# Supplementary material for: Host cell-dependent late entry step as determinant of hepatitis B virus infection
Source: PLoS Pathog. 2022 Jun 17;18(6):e1010633. doi: 10.1371/journal.ppat.1010633 (PMC9246237; doi:10.1371/journal.ppat.1010633)
Supplement: S1 Dataset — (XLSX) [file ppat.1010633.s013.xlsx]

## Sheet: WCH-17-huNTCP vs. WC3-huNTCP
GeneID	logFC	logCPM	F	PValue	FDR	WC3_NTCP_1	WC3_NTCP_2	WCH17_NTCP_1	WCH17_NTCP_2	desc	human_gene
GHT09_000001	1.5462	1.34444	17.9231	2.30517e-05	7.17842e-05	0.859193	-0.329951	1.78881	1.82007	hypothetical protein	0
GHT09_000002	1.19697	5.04195	93.9013	3.50289e-22	2.66725e-21	4.38202	4.21279	5.56479	5.42013	plexin-B1	PLXNB1
GHT09_000003	1.19935	2.50116	24.6391	6.94091e-07	2.45018e-06	1.78726	1.71014	2.87041	2.93727	three-prime repair exonuclease 1	TREX1
GHT09_000013	-1.90335	4.01752	150.396	1.72496e-34	1.96801e-33	4.90986	4.53519	2.66638	2.98507	transmembrane prolyl 4-hydroxylase	P4HTM
GHT09_000014	4.60576	5.42311	836.548	4.10855e-182	3.72105e-180	1.65285	1.88153	6.36521	6.25358	WD repeat-containing protein 6	WDR6
GHT09_000016	-1.938	8.49684	505.275	3.17294e-111	1.41502e-109	9.18391	9.15207	7.16955	7.28749	inosine-5'-monophosphate dehydrogenase 2	IMPDH2
GHT09_000021	-2.30908	2.28929	77.1601	1.63601e-18	1.07562e-17	3.26189	2.9465	0.93532	0.890429	kelch domain-containing protein 8B	KLHDC8B
GHT09_000029	1.2447	8.57046	217.344	4.58346e-49	7.5993e-48	7.76052	7.86646	9.06783	9.04931	dystroglycan	DAG1
GHT09_000031	1.80689	-0.0836009	7.4287	0.00642189	0.0153378	-0.539088	-1.83829	-0.231886	0.674178	protein bassoon	BSN
GHT09_000037	1.53069	3.22905	59.4419	1.28781e-14	7.13451e-14	2.1619	2.29949	3.75324	3.70912	ubiquitin modifier-activating enzyme 7	UBA7
GHT09_000045	-3.99474	5.16679	745.681	3.95009e-159	2.93177e-157	5.86313	6.3702	2.1121	2.24995	semaphorin-3F	SEMA3F
GHT09_000046	-4.06481	2.19596	155.557	1.22773e-35	1.45565e-34	3.04647	3.4057	-0.231886	-0.671073	hypothetical protein	0
GHT09_000049	-4.72065	0.2901	46.5086	9.24757e-12	4.47028e-11	1.2177	1.40754	-2.5025	-1.7108	sodium-coupled neutral amino acid transporter 3	SLC38A3
GHT09_000055	-1.42782	3.84163	80.9792	2.37605e-19	1.61699e-18	4.21715	4.62238	3.01511	3.03134	N-acetyltransferase 6	NAT6
GHT09_000056	-2.08504	1.49199	38.8811	4.54787e-10	1.99487e-09	1.87037	2.57402	0.307153	0.348389	hyaluronidase-1	HYAL1
GHT09_000063	1.56867	0.220934	7.85681	0.00506532	0.0122343	-1.04838	-0.329951	0.698669	0.614642	uncharacterized protein	0
GHT09_000066	1.14033	6.44369	127.512	1.58632e-29	1.56194e-28	5.68803	5.81261	6.80417	6.96582	cytokine-inducible SH2-containing protein	CISH
GHT09_000068	2.44276	5.57811	387.615	6.81248e-86	2.13829e-84	3.71968	3.99669	6.2854	6.30156	glucoside xylosyltransferase 2	GXYLT2
GHT09_000071	1.86687	5.14694	216.988	5.47617e-49	9.07208e-48	3.80667	3.98734	5.68324	5.81672	hypothetical protein	0
GHT09_000072	2.21527	3.2149	108.341	2.43344e-25	2.08194e-24	1.74383	1.61616	3.76352	3.89576	E3 ubiquitin-protein ligase PDZRN3-like	PDZRN3
GHT09_000078	-6.14734	-0.974737	16.2468	5.57035e-05	0.000167575	-0.16343	0.00277842	-2.5025	-2.5025	hypothetical protein	0
GHT09_000090	1.21787	6.6352	152.891	4.67263e-35	5.41819e-34	5.92276	5.85695	7.08906	7.12163	protein SCAF8	SCAF8
GHT09_000091	-1.93482	2.47889	64.5824	9.50296e-16	5.55032e-15	3.01028	3.4057	1.13857	1.4964	60S ribosomal protein L36a	RPL36A
GHT09_000092	1.3835	4.77519	111.38	5.67566e-26	4.97382e-25	3.56609	4.1638	5.27615	5.26177	connector enhancer of kinase suppressor of ras 3	CNKSR3
GHT09_000093	-2.98524	1.05336	49.4767	2.03875e-12	1.02056e-11	1.94896	1.99791	-0.602418	-0.671073	interactor protein for cytohesin exchange factors 1	IPCEF1
GHT09_000099	1.62441	3.19801	64.6543	9.16272e-16	5.35464e-15	1.94896	2.29949	3.8815	3.57498	regulator of G-protein signaling 17	RGS17
GHT09_000101	1.4433	4.57069	110.519	8.13341e-26	7.09138e-25	3.63901	3.65057	5.11688	5.03927	F-box only protein 5	FBXO5
GHT09_000102	2.87766	0.46991	23.8388	1.05141e-06	3.65379e-06	-1.04838	-1.38521	1.42428	0.786352	hypothetical protein	0
GHT09_000103	3.24732	2.38116	107.775	3.23548e-25	2.74189e-24	-0.539088	0.500452	3.17769	3.03134	hypothetical protein	0
GHT09_000104	2.55569	1.69707	50.112	1.47538e-12	7.43804e-12	0.134344	-0.154015	2.68813	1.99369	hypothetical protein	0
GHT09_000105	4.4923	-0.0173559	24.3268	8.16158e-07	2.86338e-06	-2.5025	-1.83829	0.698669	0.614642	hypothetical protein	0
GHT09_000106	2.83566	0.849464	31.1804	2.36615e-08	9.29772e-08	-0.771375	-1.04092	1.86717	1.12186	hypothetical protein	0
GHT09_000107	2.5143	5.81552	433.454	8.99799e-96	3.31523e-94	4.13549	3.94929	6.6589	6.43555	hypothetical protein	0
GHT09_000112	5.31384	4.69156	683.69	5.33864e-149	3.55201e-147	0.938376	-0.329951	5.57358	5.57262	A-kinase anchor protein 12	AKAP12
GHT09_000118	4.0274	-0.377934	15.7003	7.43358e-05	0.000221392	-2.5025	-1.83829	0.307153	0.194237	hypothetical protein	0
GHT09_000128	2.49651	2.26165	70.9101	3.85809e-17	2.40213e-16	0.859193	0.14419	2.98027	2.83664	protein FAM151B	FAM151B
GHT09_000139	-2.38535	6.36301	494.565	6.36523e-109	2.76082e-107	7.14275	7.1249	4.87283	4.64831	arylsulfatase B	ARSB
GHT09_000148	-6.07744	0.72374	76.3176	2.50454e-18	1.63411e-17	1.65285	1.96015	-2.5025	-2.05301	hypothetical protein	0
GHT09_000149	-3.65587	-1.10661	8.91619	0.0028282	0.0070693	-0.539088	-0.154015	-1.87352	-2.5025	hypothetical protein	0
GHT09_000171	2.3337	7.33176	598.038	3.8813e-131	2.13357e-129	5.79827	5.65018	8.09068	8.02213	single-stranded DNA-binding protein 3	SSBP3
GHT09_000172	2.22808	3.67997	142.911	6.97053e-33	7.52664e-32	2.02349	2.23771	4.33879	4.3018	hypothetical protein	0
GHT09_000178	-7.21783	3.83317	611.638	4.71758e-134	2.64275e-132	4.9	4.96506	-1.87352	-1.20254	tetratricopeptide repeat protein 22	TTC22
GHT09_000180	1.57491	5.85668	196.281	1.71318e-44	2.5339e-43	4.75989	4.92152	6.27646	6.52821	hypothetical protein	0
GHT09_000181	1.67196	6.94765	300.662	4.09897e-67	9.44739e-66	5.82977	5.9099	7.5541	7.52531	delta(24)-sterol reductase	DHCR24
GHT09_000189	4.0373	7.37961	1404.61	2.6402e-302	5.65416e-300	4.2793	4.2208	8.2985	8.25351	hypothetical protein	0
GHT09_000203	-1.08244	5.19943	84.9845	3.37082e-20	2.37983e-19	5.39708	5.88996	4.61343	4.56426	hippocalcin protein 1-like	HPCAL1
GHT09_000204	2.49969	4.24924	235.564	5.11868e-53	9.16681e-52	2.45904	2.49701	4.98252	4.90593	ribonucleoside-diphosphate reductase subunit M2	RRM2
GHT09_000210	-1.09733	4.74831	75.2151	4.37278e-18	2.82882e-17	5.10697	5.32952	4.23917	4.03852	integrin beta-1-binding protein 1	ITGB1BP1
GHT09_000211	-1.0203	4.5845	61.4057	4.75581e-15	2.68833e-14	4.9629	5.10139	4.07552	3.97484	hypothetical protein	0
GHT09_000212	1.51523	5.53691	168.505	1.86751e-38	2.39814e-37	4.59861	4.53519	6.17035	5.98338	lysophospholipid acyltransferase 2	MBOAT2
GHT09_000213	-2.05708	3.42562	124.65	6.68223e-29	6.45279e-28	4.1522	4.2208	2.14393	2.19003	DNA-binding protein inhibitor ID-2	ID2
GHT09_000214	-3.24894	-1.32986	5.87441	0.0153668	0.0348705	-0.339066	-1.04092	-1.87352	-2.5025	hypothetical protein	0
GHT09_000217	-7.2732	-0.135954	40.3927	2.09883e-10	9.39673e-10	1.27983	0.391189	-2.5025	-2.5025	hypothetical protein	0
GHT09_000218	-3.23652	-0.797876	10.8982	0.000963411	0.0025511	-0.16343	0.14419	-1.87352	-2.05301	UMP-CMP kinase 2 mitochondrial	CMPK2
GHT09_000257	-1.0168	5.34025	78.2573	9.90135e-19	6.56228e-18	5.53721	5.98937	4.84889	4.69577	hypothetical protein	0
GHT09_000262	-1.7746	6.87942	338.709	2.45015e-75	6.58466e-74	7.53946	7.5093	5.67237	5.82166	NADH dehydrogenase ubiquinone 1 beta subcomplex subunit 2 mitochondrial	NDUFB2
GHT09_000263	-1.72205	2.443	51.3485	7.8639e-13	4.01475e-12	3.02849	3.22646	1.5244	1.42887	putative aarF domain-containing protein kinase 2	0
GHT09_000264	3.31577	1.27221	51.2788	8.14751e-13	4.15541e-12	-1.39151	-0.530361	1.74797	2.08427	DENN domain-containing protein 2A	DENND2A
GHT09_000266	-1.32825	3.05214	45.8022	1.32569e-11	6.36649e-11	3.71968	3.51391	2.26465	2.36282	hypothetical protein	0
GHT09_000271	-3.88009	-0.975494	11.1061	0.000861214	0.00229467	-0.339066	0.00277842	-2.5025	-2.05301	hypothetical protein	0
GHT09_000274	-1.5046	6.33761	213.589	3.53682e-48	5.74356e-47	6.84304	6.98971	5.59677	5.2373	ubinuclein-2	UBN2
GHT09_000276	-1.25002	5.93324	133.923	6.69792e-31	6.86111e-30	6.30161	6.57456	5.32903	5.07284	zinc finger CCCH-type antiviral protein 1-like	ZC3HAV1L
GHT09_000277	-2.1094	3.43249	129.853	5.17629e-30	5.1836e-29	4.02192	4.36503	2.45429	1.84619	hypothetical protein	0
GHT09_000278	-2.56944	4.4935	311.016	2.36364e-69	5.61782e-68	5.24185	5.41225	2.98027	2.62665	hypothetical protein	0
GHT09_000283	-7.18434	-0.20854	37.6026	8.75156e-10	3.76409e-09	0.490195	1.09554	-2.5025	-2.5025	3-oxo-5-beta-steroid 4-dehydrogenase	AKR1D1
GHT09_000285	1.15653	0.491593	5.71943	0.0167853	0.0379176	0.490195	-1.38521	0.698669	0.939781	hypothetical protein	0
GHT09_000286	1.60387	3.47534	74.2705	7.61861e-18	4.87795e-17	2.85567	1.79838	4.05055	3.95096	SAM and SH3 domain-containing protein 1	SASH1
GHT09_000287	-1.33056	5.45143	135.294	3.18639e-31	3.30353e-30	5.89076	6.08895	4.65268	4.68133	semaphorin-4F	SEMA4F
GHT09_000289	5.76895	1.09009	69.3428	8.52791e-17	5.23047e-16	-2.5025	-1.83829	1.47521	2.06215	hypothetical protein	0
GHT09_000290	2.78617	5.21011	421.058	4.21039e-93	1.49502e-91	3.08178	3.30387	5.85652	6.04951	docking protein 1	DOK1
GHT09_000291	3.74633	3.40587	241.864	2.20487e-54	4.0329e-53	0.77541	0.391189	4.28271	4.10493	hypothetical protein	0
GHT09_000303	-4.86645	2.33119	199.733	3.04934e-45	4.59278e-44	3.39417	3.43352	-0.602418	-1.20254	rhotekin	RTKN
GHT09_000309	2.93403	0.752656	30.1483	4.02593e-08	1.55435e-07	-0.771375	-1.38521	1.31668	1.42887	hypothetical protein	0
GHT09_000310	1.32609	7.37112	215.287	1.28131e-48	2.10236e-47	6.59529	6.50906	7.77281	7.97186	bifunctional methylenetetrahydrofolate dehydrogenase/cyclohydrolase mitochondrial	MTHFD2
GHT09_000312	2.09531	2.47655	62.6705	2.52557e-15	1.44432e-14	1.45162	0.500452	2.88931	3.18251	hypothetical protein	0
GHT09_000313	2.18385	5.65834	330.26	1.63832e-73	4.21555e-72	4.1522	4.17209	6.36521	6.30745	methylcytosine dioxygenase TET3	TET3
GHT09_000324	-7.2749	2.66377	305.191	5.63478e-68	1.32093e-66	3.44929	4.06943	-1.87352	-2.05301	putative N-acetyltransferase CML1	0
GHT09_000328	5.0158	-1.41803	5.98677	0.0144177	0.0328619	-2.5025	-2.5025	-1.43697	-0.671073	hypothetical protein	0
GHT09_000334	-4.3822	-0.638821	17.9837	2.23289e-05	6.96071e-05	0.77541	-0.530361	-1.87352	-2.5025	mitochondrial sodium/hydrogen exchanger 9B2	SLC9B2
GHT09_000339	-1.10419	3.31633	37.4988	9.22957e-10	3.95974e-09	3.70843	3.90029	2.75149	2.70009	hypothetical protein	0
GHT09_000341	-2.13809	7.07573	497.615	5.13027e-109	2.22988e-107	7.95752	7.61255	5.63086	5.68724	zinc transporter ZIP8	SLC39A8
GHT09_000352	-3.95099	0.465792	44.9546	2.06426e-11	9.79439e-11	1.69906	1.16357	-0.83081	-2.5025	hypothetical protein	0
GHT09_000353	1.32348	2.75721	34.2219	4.95434e-09	2.03468e-08	1.9102	1.92138	3.22309	3.18251	hypothetical protein	0
GHT09_000355	-2.6314	3.00442	144.881	2.59442e-33	2.8417e-32	3.76383	3.98734	1.66265	1.03369	hypothetical protein	0
GHT09_000357	5.72888	-0.984118	10.7629	0.00103643	0.00273215	-2.5025	-2.5025	-1.10229	-0.0731063	hypothetical protein	0
GHT09_000379	-8.71542	1.13549	116.204	4.66111e-27	4.23642e-26	2.09436	2.41564	-2.5025	-2.5025	hypothetical protein	0
GHT09_000380	-8.5457	0.977801	102.812	3.93506e-24	3.23087e-23	2.09436	2.1056	-2.5025	-2.5025	hypothetical protein	0
GHT09_000386	-8.98656	3.54827	547.925	2.18768e-120	1.09166e-118	4.61677	4.7103	-2.5025	-2.05301	mitogen-activated protein kinase kinase kinase 15	MAP3K15
GHT09_000387	1.73897	6.432	278.931	3.93273e-62	8.30113e-61	5.51801	5.03937	6.9973	7.06715	SH3 domain-containing kinase-binding protein 1	SH3KBP1
GHT09_000398	2.46682	8.37468	762.992	1.99953e-166	1.62484e-164	6.68986	6.63422	9.18791	9.06486	discoidin CUB and LCCL domain-containing protein 2	DCBLD2
GHT09_000400	1.30051	1.33505	13.18	0.000283298	0.000794372	0.591662	0.500452	1.82852	1.68187	G-protein coupled receptor 15	GPR15
GHT09_000403	3.29966	5.06879	503.257	2.76124e-108	1.18762e-106	2.02349	3.02175	5.9291	5.81341	band 4.1 protein 3	EPB41L3
GHT09_000406	1.75027	6.09945	253.674	6.08285e-57	1.17756e-55	4.94384	4.96506	6.6726	6.72403	membrane-associated guanylate kinase WW and PDZ domain-containing protein 3	MAGI3
GHT09_000407	1.769	2.68128	54.1049	1.93606e-13	1.01695e-12	1.50462	1.51561	3.23792	3.20286	hypothetical protein	0
GHT09_000420	-5.42388	-1.4125	9.02973	0.00265784	0.00667113	-0.771375	-0.530361	-2.5025	-2.5025	hypothetical protein	0
GHT09_000423	2.98688	1.80291	65.523	5.90052e-16	3.48188e-15	-0.539088	0.00277842	2.32143	2.58071	liprin-alpha-4	PPFIA4
GHT09_000426	-1.06739	7.53951	147.482	7.03817e-34	7.84269e-33	7.99563	7.97043	6.85673	6.97102	adiponectin receptor protein 1	ADIPOR1
GHT09_000438	5.82803	-0.921845	11.6517	0.000642048	0.001737	-2.5025	-2.5025	-0.602418	-0.174493	hypothetical protein	0
GHT09_000442	5.03675	-1.41532	6.05652	0.0138591	0.0317258	-2.5025	-2.5025	-0.405289	-1.4344	hypothetical protein	0
GHT09_000445	-7.68607	0.209824	56.41	6.00203e-14	3.22014e-13	1.50462	1.02414	-2.5025	-2.5025	tyrosine-protein phosphatase non-receptor type 7	PTPN7
GHT09_000447	-4.85557	-1.69345	5.70784	0.0168938	0.0380145	-1.04838	-1.04092	-2.5025	-2.5025	prosaposin receptor GPR37L1	GPR37L1
GHT09_000448	-1.06375	7.00257	131.751	2.01895e-30	2.03969e-29	7.27447	7.60186	6.33967	6.42584	ETS-related transcription factor Elf-3	ELF3
GHT09_000453	1.03024	5.1562	73.4253	1.12375e-17	7.14385e-17	4.75443	4.26792	5.66142	5.45661	neuron navigator 1	NAV1
GHT09_000454	3.94435	6.55438	1057.86	3.88139e-229	5.46558e-227	3.59081	3.41968	7.37208	7.48847	pleckstrin domain family A member 3	0
GHT09_000455	3.79743	5.79507	771.911	2.49632e-168	2.04469e-166	2.83513	2.92706	6.60132	6.69198	hypothetical protein	0
GHT09_000458	10.0098	8.2286	3397.44	0	0	-0.339066	-0.530361	9.17714	9.25111	troponin T cardiac muscle	TNNT2
GHT09_000460	1.83071	6.33587	296.966	2.5832e-66	5.87478e-65	5.13245	5.12717	6.87462	7.02847	hypothetical protein	0
GHT09_000466	4.52405	6.22943	1095.48	4.1701e-237	6.12379e-235	2.63574	2.64713	7.01247	7.231	hypothetical protein	0
GHT09_000467	-5.25799	-1.50026	7.89615	0.00495636	0.0119978	-0.539088	-1.04092	-2.5025	-2.5025	hypothetical protein	0
GHT09_000468	2.4669	3.11255	119.34	9.6321e-28	8.98079e-27	1.15278	1.56676	3.56623	3.90821	uncharacterized protein	0
GHT09_000469	1.95471	7.43676	447.174	9.99363e-99	3.81185e-97	6.2267	6.05129	8.1783	8.00702	actin-binding protein anillin	ANLN
GHT09_000470	-1.04085	5.46791	84.9108	3.26432e-20	2.30623e-19	5.9397	5.89246	4.79478	4.94875	dnaJ subfamily B member 9	0
GHT09_000473	-1.87429	2.12433	48.6899	3.04333e-12	1.50584e-11	2.87593	2.82572	1.42428	0.731355	hypothetical protein	0
GHT09_000489	3.73591	0.104395	23.2623	1.41845e-06	4.87495e-06	-1.39151	-2.5025	0.698669	0.786352	hypothetical protein	0
GHT09_000493	3.51329	5.38855	614.462	1.17091e-134	6.68687e-133	2.91561	2.52314	6.20471	6.22151	GRAM domain-containing protein 3	GRAMD3
GHT09_000497	1.63309	4.08352	108.109	2.73438e-25	2.32875e-24	2.99183	3.02175	4.45753	4.74519	hypothetical protein	0
GHT09_000499	-5.46604	0.944062	83.7978	5.72519e-20	3.98997e-19	1.74383	2.26893	-1.43697	-2.5025	hypothetical protein	0
GHT09_000500	-3.34983	5.92434	730.017	2.62202e-129	1.41116e-127	6.48752	7.10125	3.58953	3.4184	cyclic AMP-responsive element-binding protein 5	CREB5
GHT09_000501	8.88964	1.62636	117.753	2.1388e-27	1.97182e-26	-2.5025	-2.5025	2.57595	2.30749	TLR4 interactor with leucine rich repeats	TRIL
GHT09_000506	-2.14838	1.01785	29.1625	6.69234e-08	2.5404e-07	1.55574	1.99791	-0.231886	-0.0731063	small VCP/p97-interacting protein	SVIP
GHT09_000513	1.09035	1.01793	7.58877	0.00587589	0.0141025	-0.00687362	0.696902	1.61802	1.16401	histone-lysine N-methyltransferase SETMAR	SETMAR
GHT09_000515	1.55593	4.95507	147.241	7.94177e-34	8.82566e-33	3.81718	4.06943	5.55299	5.43956	inositol 1 4 5-trisphosphate receptor type 1	ITPR1
GHT09_000525	-4.51336	2.49813	208.828	3.79159e-47	5.99165e-46	3.78541	3.30387	-1.43697	-0.174493	hypothetical protein	0
GHT09_000532	5.64272	-1.04643	9.99682	0.00156925	0.00404642	-2.5025	-2.5025	-0.602418	-0.401522	hypothetical protein	0
GHT09_000533	4.79043	1.8484	107.475	3.76286e-25	3.18487e-24	-1.39151	-1.38521	2.70956	2.54926	hypothetical protein	0
GHT09_000534	4.0293	1.89534	96.2814	1.05554e-22	8.20447e-22	-0.771375	-1.04092	2.55242	2.70009	hypothetical protein	0
GHT09_000549	7.64322	4.53758	745.71	7.10686e-162	5.39151e-160	-2.5025	-0.763173	5.52304	5.36474	hypothetical protein	0
GHT09_000559	-5.25831	-1.50022	7.8974	0.00495292	0.0119978	-1.39151	-0.329951	-2.5025	-2.5025	hypothetical protein	0
GHT09_000562	3.16624	0.105794	19.5679	9.73361e-06	3.12433e-05	-1.84261	-1.38521	0.781941	0.674178	hypothetical protein	0
GHT09_000563	-1.03216	7.0687	126.123	3.18739e-29	3.10861e-28	7.46118	7.54241	6.48498	6.45901	hypothetical protein	0
GHT09_000564	5.02624	-1.41668	6.02146	0.014137	0.0322997	-2.5025	-2.5025	-0.83081	-1.00283	hypothetical protein	0
GHT09_000566	-1.85673	6.63228	344.888	1.1335e-76	3.11129e-75	7.26874	7.32755	5.36323	5.51477	mitochondrial pyruvate carrier 2	MPC2
GHT09_000573	-1.2519	4.20114	76.3229	2.49776e-18	1.6302e-17	4.56781	4.88167	3.61246	3.39205	hypothetical protein	0
GHT09_000574	1.40249	0.558883	8.48371	0.00358534	0.00887123	-0.771375	0.14419	1.07395	0.890429	hypothetical protein	0
GHT09_000575	3.3223	3.12622	178.332	1.36234e-40	1.84023e-39	0.490195	0.869781	4.01657	3.74427	iroquois-class homeodomain protein IRX-5	IRX5
GHT09_000577	-6.0496	-1.03911	15.0034	0.000107549	0.000315028	-1.04838	0.391189	-2.5025	-2.5025	hypothetical protein	0
GHT09_000578	-5.83064	-1.17718	12.5589	0.000394755	0.00109317	-0.771375	0.00277842	-2.5025	-2.5025	72 kDa type IV collagenase	MMP2
GHT09_000580	-4.91942	-0.247041	29.3051	6.21794e-08	2.36731e-07	0.490195	0.949025	-2.5025	-2.05301	sodium-dependent noradrenaline transporter	SLC6A2
GHT09_000583	-5.83023	-1.17723	12.5564	0.000395281	0.00109346	-0.00687362	-0.763173	-2.5025	-2.5025	hypothetical protein	0
GHT09_000585	-1.77311	1.56686	30.932	2.68887e-08	1.05276e-07	1.94896	2.52314	0.307153	0.786352	hypothetical protein	0
GHT09_000590	-1.19412	2.66213	29.4968	5.64563e-08	2.155e-07	3.4357	2.88737	2.26465	1.82007	neuroserpin	SERPINI1
GHT09_000602	-1.5881	0.717048	13.8322	0.000200147	0.00057206	1.2177	1.46259	0.307153	-0.401522	ectonucleoside triphosphate diphosphohydrolase 8	0
GHT09_000603	-1.04455	4.55287	63.3284	1.79412e-15	1.0361e-14	5.05905	4.96029	4.09193	3.87053	NADPH oxidase activator 1	NOXA1
GHT09_000604	-4.7073	4.36559	628.754	3.75074e-137	2.22223e-135	5.52123	5.25741	1.25972	0.419699	notch-regulated ankyrin repeat-containing protein	NRARP
GHT09_000607	1.16411	9.71419	196.315	1.68455e-44	2.49335e-43	9.08243	8.94688	10.1258	10.2321	tubulin beta-4B chain	TUBB4B
GHT09_000624	1.24037	3.73254	54.0815	1.9592e-13	1.02858e-12	3.11624	2.76131	4.23178	4.12107	hypothetical protein	0
GHT09_000625	1.71365	0.324115	9.89808	0.00165801	0.00426194	-2.5025	0.14419	0.698669	0.839329	hypothetical protein	0
GHT09_000626	2.61901	-0.297866	10.4973	0.00119644	0.00313266	-1.84261	-1.38521	0.190081	0.273371	alpha-(1 3)-fucosyltransferase 7	FUT7
GHT09_000628	-2.83479	2.77455	141.026	1.92666e-32	2.06196e-31	3.35141	3.9589	0.698669	1.12186	chloride intracellular channel protein 3	CLIC3
GHT09_000633	-3.0789	3.51177	244.706	5.33885e-55	9.87063e-54	4.27168	4.598	1.31668	1.52901	hypothetical protein	0
GHT09_000637	-1.97038	0.0879617	12.2902	0.000455832	0.0012527	0.262963	1.16357	-1.10229	-0.671073	hypothetical protein	0
GHT09_000639	1.26127	2.4231	25.7193	3.96575e-07	1.42563e-06	1.3966	1.84056	3.04912	2.67116	hypothetical protein	0
GHT09_000641	-1.49888	3.53283	75.1601	4.49601e-18	2.90671e-17	4.1522	4.1471	2.62187	2.71434	hypothetical protein	0
GHT09_000643	-1.23407	7.70465	199.734	3.04762e-45	4.59278e-44	8.19169	8.20895	6.86272	7.0595	hypothetical protein	0
GHT09_000646	-11.9399	4.34945	886.331	1.03033e-192	1.01352e-190	5.33624	5.54252	-2.5025	-2.5025	epidermal growth factor protein 7	EGFL7
GHT09_000653	1.31179	0.169017	5.51345	0.0188755	0.0421668	-0.339066	-0.763173	0.93532	0.194237	hypothetical protein	0
GHT09_000659	-3.3231	-0.743128	11.9504	0.000546907	0.00149044	-0.539088	0.500452	-1.87352	-2.05301	hypothetical protein	0
GHT09_000660	-3.2548	0.391396	34.031	5.46457e-09	2.23708e-08	1.3966	1.22854	-1.10229	-1.4344	hypothetical protein	0
GHT09_000662	2.48369	-0.0811236	12.0423	0.000520589	0.00142154	-1.39151	-1.38521	0.516152	0.419699	LIM/homeobox protein Lhx3	LHX3
GHT09_000663	-1.48051	1.38043	19.6438	9.35486e-06	3.00745e-05	2.12852	1.84056	0.698669	0.552542	hypothetical protein	0
GHT09_000664	4.09041	5.34594	721.967	1.15663e-157	8.37296e-156	2.1619	2.17317	6.27286	6.14335	hypothetical protein	0
GHT09_000665	4.64667	3.48155	307.973	1.07526e-68	2.53222e-67	0.262963	-0.530361	4.31102	4.29708	hypothetical protein	0
GHT09_000666	1.05084	7.18567	132.346	1.4e-30	1.42277e-29	6.53924	6.57924	7.53847	7.67353	ubiquitin-associated domain-containing protein 1	UBAC1
GHT09_000675	4.4923	-0.0173559	24.3268	8.16158e-07	2.86338e-06	-2.5025	-1.83829	0.698669	0.614642	hypothetical protein	0
GHT09_000680	1.56151	5.79396	190.297	4.40828e-43	6.2633e-42	4.97704	4.5732	6.20282	6.4664	hypothetical protein	0
GHT09_000684	-2.39359	2.27451	80.4737	3.16419e-19	2.14129e-18	2.93505	3.2734	1.37148	0.273371	melanoregulin	MREG
GHT09_000690	7.05929	0.011849	31.8396	1.6854e-08	6.68277e-08	-2.5025	-2.5025	0.516152	0.839329	MAM domain-containing glycosylphosphatidylinositol anchor protein 1	MDGA1
GHT09_000696	-1.69185	6.3044	264.155	3.26382e-59	6.61744e-58	6.84561	7.01985	5.16809	5.31417	serine/threonine-protein kinase pim-1	PIM1
GHT09_000703	-4.33109	2.86765	250.089	6.11734e-56	1.16021e-54	3.51534	4.23668	-0.405289	0.0216203	hypothetical protein	0
GHT09_000705	-7.46837	4.3456	823.399	2.60432e-179	2.30785e-177	5.40755	5.4536	-1.87352	-1.00283	ras-related protein Rab-44	RAB44
GHT09_000706	1.51803	7.11506	262.232	1.19051e-58	2.39021e-57	6.19682	6.11066	7.49286	7.82281	cyclin-dependent kinase inhibitor 1	CDKN1A
GHT09_000709	1.85017	2.8039	62.557	2.65274e-15	1.51662e-14	1.82941	1.22854	3.11484	3.51925	hypothetical protein	0
GHT09_000710	1.35289	5.03847	117.787	2.10348e-27	1.94187e-26	4.20919	4.15548	5.48005	5.56871	peroxisome proliferator-activated receptor gamma coactivator 1-alpha	PPARGC1A
GHT09_000713	-1.49256	4.84955	139.729	3.44125e-32	3.6506e-31	5.57177	5.30714	4.04213	3.89576	transmembrane protein 261	DMAC1
GHT09_000717	-2.34069	8.16037	693.706	3.9738e-151	2.75076e-149	8.77282	9.03209	6.61699	6.52417	mannan-binding lectin serine protease 1	MASP1
GHT09_000728	1.38012	4.8794	115.519	6.77473e-27	6.12227e-26	3.92804	4.06943	5.1758	5.52491	alanine aminotransferase 2	GPT2
GHT09_000737	6.87392	4.88768	861.504	1.98546e-187	1.88106e-185	-1.04838	-0.329951	5.89678	5.70519	transcription factor Maf	MAF
GHT09_000738	-1.28952	1.56365	17.1727	3.41986e-05	0.000104814	2.19453	2.03471	0.781941	0.987501	dynein light chain roadblock-type 2	DYNLRB2
GHT09_000739	-3.10261	-0.497452	14.1137	0.000172319	0.000495483	0.381049	0.272969	-1.87352	-1.7108	hypothetical protein	0
GHT09_000740	-3.32565	1.08406	58.5556	2.01931e-14	1.10855e-13	2.09436	1.99791	-1.43697	-0.530011	chromodomain Y protein 2-like	CDYL2
GHT09_000749	-5.67138	0.368227	56.173	6.76963e-14	3.62345e-13	1.3394	1.51561	-2.5025	-2.05301	beta beta-carotene 15 15'-dioxygenase	BCO1
GHT09_000754	-1.063	3.68077	42.1622	8.49625e-11	3.90453e-10	4.16048	4.1471	3.29573	2.93727	zinc finger protein 605	ZNF605
GHT09_000755	1.50448	6.06212	190.287	3.43557e-43	4.8914e-42	5.00949	5.19376	6.59988	6.60861	golgin subfamily A member 3	GOLGA3
GHT09_000762	4.97501	1.15414	67.4456	2.22827e-16	1.33911e-15	-2.5025	-1.38521	1.97727	1.84619	hypothetical protein	0
GHT09_000773	6.6093	-0.341814	22.1766	2.49784e-06	8.43651e-06	-2.5025	-2.5025	-0.405289	0.674178	hypothetical protein	0
GHT09_000790	-1.83412	6.53966	328.094	4.81329e-73	1.22927e-71	7.26874	7.13023	5.36323	5.37823	hypothetical protein	0
GHT09_000797	1.3797	6.40099	180.467	4.67929e-41	6.36675e-40	5.56243	5.51348	6.90047	6.9281	retinoblastoma-binding protein 5	RBBP5
GHT09_000798	1.48182	4.83737	129.197	6.80452e-30	6.77781e-29	3.78541	3.97792	5.35645	5.35568	dual serine/threonine and tyrosine protein kinase	DSTYK
GHT09_000800	-2.08399	6.51425	410.218	9.12466e-91	3.10073e-89	7.17274	7.28428	5.07622	5.21242	NUAK family SNF1 kinase 2-like	NUAK2
GHT09_000801	-2.22505	4.27407	223.709	1.90681e-50	3.25598e-49	4.94384	5.16085	2.68813	2.97327	hypothetical protein	0
GHT09_000802	-13.8449	6.30633	2024.53	0	0	7.187	7.48541	-2.5025	-2.5025	kelch domain-containing protein 8A	KLHDC8A
GHT09_000803	7.41191	0.296953	42.0222	9.12628e-11	4.18531e-10	-2.5025	-2.5025	1.20041	0.890429	hypothetical protein	0
GHT09_000805	-2.42985	6.67079	560.513	4.34575e-123	2.2225e-121	7.3	7.57869	5.00868	5.0336	cyclin-dependent kinase 18	CDK18
GHT09_000808	-3.93109	3.05545	254.199	4.68144e-57	9.12282e-56	3.9183	4.2208	0.516152	0.194237	solute carrier family 45 member 3	SLC45A3
GHT09_000810	-4.40012	2.85263	251.854	1.50784e-56	2.89987e-55	4.03999	3.76449	-0.83081	0.110509	ras-related protein Rab-7L1	RAB29
GHT09_000814	-5.2581	-1.50025	7.89657	0.00495521	0.0119978	-0.771375	-0.763173	-2.5025	-2.5025	putative carboxypeptidase PM20D1	0
GHT09_000817	-6.23883	-0.913099	17.5041	2.87286e-05	8.86301e-05	0.381049	-0.530361	-2.5025	-2.5025	hypothetical protein	0
GHT09_000818	-2.03313	6.46165	386.246	1.34493e-85	4.18945e-84	7.24558	7.08379	5.11287	5.16132	ras-related protein Rab-7b	RAB7B
GHT09_000827	4.94662	2.28773	149.099	3.12782e-34	3.52936e-33	-0.771375	-1.83829	3.03221	3.1089	ras association domain-containing protein 5	RASSF5
GHT09_000830	-1.11717	6.95113	143.157	6.16088e-33	6.67342e-32	7.43667	7.39012	6.26565	6.32729	MAP kinase-activated protein kinase 2	MAPKAPK2
GHT09_000831	-1.04508	5.52099	86.7694	1.27779e-20	9.16614e-20	5.96355	5.97761	4.79478	5.03644	hypothetical protein	0
GHT09_000832	-3.37312	-0.00350364	25.2752	4.99146e-07	1.77573e-06	0.77541	1.02414	-2.5025	-1.20254	interleukin-10	IL10
GHT09_000835	1.09743	5.3433	87.7152	7.92914e-21	5.72787e-20	4.62876	4.71598	5.73379	5.79341	methylcytosine dioxygenase TET2	TET2
GHT09_000836	3.69444	1.76889	81.5113	1.81617e-19	1.23966e-18	-0.771375	-0.763173	2.50419	2.48422	hypothetical protein	0
GHT09_000837	4.20741	3.46853	281.044	7.19623e-63	1.54112e-61	0.381049	0.14419	4.30399	4.24894	regulator of G-protein signaling 2	RGS2
GHT09_000840	2.37707	6.87173	548.969	3.38935e-120	1.67908e-118	5.01862	5.40875	7.6263	7.57106	frizzled-4	FZD4
GHT09_000845	-4.36874	1.70873	120.863	4.47958e-28	4.2207e-27	2.70531	2.82572	-0.602418	-1.4344	ammonium transporter Rh type A	RHAG
GHT09_000850	-1.0286	0.610648	5.64762	0.0174837	0.0392452	1.08479	1.02414	0.0626637	0.194237	UDP-N-acetylglucosamine transporter	SLC35A3
GHT09_000854	5.79463	1.90407	124.935	5.79097e-29	5.6053e-28	-1.39151	-2.5025	2.70956	2.6857	vascular endothelial growth factor C	VEGFC
GHT09_000856	-1.02954	5.44251	82.4415	1.13542e-19	7.79401e-19	5.89573	5.87735	4.90104	4.82616	N(4)-(beta-N-acetylglucosaminyl)-L-asparaginase	AGA
GHT09_000857	1.99365	7.72144	484.128	1.11698e-106	4.71541e-105	6.36389	6.4284	8.38178	8.39404	transducin enhancer protein 1	TLE1
GHT09_000860	-1.12174	5.54206	99.5706	2.01281e-23	1.60954e-22	6.05078	5.97997	5.03862	4.76586	corepressor interacting with RBPJ 1	CIR1
GHT09_000863	1.46722	4.65689	118.21	1.70036e-27	1.57325e-26	3.61511	3.80765	5.2398	5.10565	hypothetical protein	0
GHT09_000864	-5.96207	0.621513	70.0622	5.92523e-17	3.65706e-16	1.78726	1.61616	-2.5025	-2.05301	dedicator of cytokinesis protein 2	DOCK2
GHT09_000868	7.06619	4.28409	631.106	3.1822e-138	1.91856e-136	-1.39151	-1.04092	5.15643	5.1871	sortilin-related receptor	SORL1
GHT09_000878	2.04312	7.14315	453.522	4.29804e-100	1.68311e-98	5.73869	5.80996	7.76003	7.86534	out at first protein-like	OAF
GHT09_000880	-1.94331	7.03478	414.804	9.37599e-92	3.23968e-90	7.63094	7.7952	5.80021	5.75257	nectin-1	NECTIN1
GHT09_000882	15.6995	8.20991	3505.01	0	0	-2.5025	-2.5025	9.16168	9.23174	thy-1 membrane glycoprotein	THY1
GHT09_000883	1.90227	4.16498	146.391	1.21631e-33	1.34514e-32	2.68249	3.05795	4.7695	4.75211	ubiquitin carboxyl-terminal hydrolase 2	USP2
GHT09_000885	-8.0071	0.489549	71.0718	3.555e-17	2.21477e-16	1.3966	1.75494	-2.5025	-2.5025	complement C1q tumor necrosis factor-related protein 5	C1QTNF5
GHT09_000887	1.38175	8.77694	267.555	5.98921e-60	1.22642e-58	7.91533	7.93132	9.27448	9.33348	cell surface glycoprotein MUC18	MCAM
GHT09_000889	-6.7359	2.65239	294.965	1.22405e-65	2.75331e-64	3.36581	4.09578	-1.87352	-1.7108	Na(+)/H(+) exchange regulatory cofactor NHE-RF4	PDZD3
GHT09_000892	-1.12755	4.7596	79.6063	4.75338e-19	3.18945e-18	5.18616	5.2996	4.2094	4.0498	C2 domain-containing protein 2	C2CD2
GHT09_000894	1.43508	6.68987	211.729	7.58214e-48	1.21782e-46	5.82977	5.74483	7.08599	7.33783	histone H2AX	H2AX
GHT09_000898	-1.01187	5.30351	77.0306	1.80433e-18	1.18326e-17	5.54672	5.91731	4.59628	4.84571	glucose-6-phosphate translocase	SLC37A4
GHT09_000904	-2.52785	9.73237	844.912	6.78785e-184	6.20228e-182	10.4413	10.5652	7.99358	7.96182	ferritin light chain	FTL
GHT09_000906	-5.55769	2.99287	330.349	1.56704e-73	4.03719e-72	3.89864	4.26018	-1.43697	-0.671073	trehalase	TREH
GHT09_000908	1.53311	6.13566	201.832	1.06732e-45	1.62783e-44	5.2222	5.08832	6.65062	6.71786	intraflagellar transport protein 46	IFT46
GHT09_000911	1.72232	7.21703	338.899	3.92853e-75	1.05028e-73	5.9445	6.24626	7.92253	7.71974	histone-lysine N-methyltransferase 2A	KMT2A
GHT09_000918	-2.60861	0.869674	35.5071	2.56187e-09	1.07095e-08	1.3966	1.99791	-0.231886	-0.827436	myelin protein zero protein 3-like	MPZL3
GHT09_000921	14.5206	7.0447	2418.24	0	0	-2.5025	-2.5025	8.03023	8.0081	sodium channel subunit beta-4	SCN4B
GHT09_000922	5.02101	-1.41736	6.00407	0.014277	0.0325846	-2.5025	-2.5025	-1.10229	-0.827436	hypothetical protein	0
GHT09_000925	3.32065	7.78309	1151.7	5.34072e-249	8.57811e-247	5.22615	5.40173	8.54377	8.71294	FXYD domain-containing ion transport regulator 6	FXYD6
GHT09_000926	-1.01084	8.33223	144.609	2.97304e-33	3.24603e-32	8.62545	8.87292	7.72823	7.75937	hypothetical protein	0
GHT09_000929	1.26417	6.134	140.786	2.0243e-32	2.1642e-31	5.37945	5.32582	6.6381	6.59037	centrosomal protein of 164 kDa	CEP164
GHT09_000935	-6.32551	-0.853894	18.7793	1.471e-05	4.66198e-05	-0.00687362	0.14419	-2.5025	-2.5025	apolipoprotein A-I	APOA1
GHT09_000936	-5.42399	-1.41249	9.0302	0.00265716	0.00667113	-1.04838	-0.329951	-2.5025	-2.5025	hypothetical protein	0
GHT09_000937	-8.54605	0.977872	102.829	3.90078e-24	3.20528e-23	1.82941	2.32942	-2.5025	-2.5025	apolipoprotein A-IV	APOA4
GHT09_000940	2.54187	6.03247	468.277	2.86958e-103	1.15001e-101	4.1522	4.32102	6.71162	6.82352	extracellular tyrosine-protein kinase PKDCC	PKDCC
GHT09_000943	2.34445	6.48734	478.162	2.14454e-105	8.94314e-104	4.80284	4.92642	7.19065	7.21605	acetyl-coenzyme A synthetase 2 mitochondrial-like	ACSS1
GHT09_000946	1.76547	3.65461	96.6534	8.751e-23	6.82001e-22	2.61179	2.32942	4.24652	4.18386	ectonucleoside triphosphate diphosphohydrolase 6	0
GHT09_000949	1.44834	6.31309	192.256	1.28325e-43	1.85222e-42	5.4487	5.34792	6.83982	6.84797	DNA replication complex GINS protein PSF1	GINS1
GHT09_000950	1.11819	4.75711	74.6005	5.96623e-18	3.84272e-17	3.99439	4.13867	5.23241	5.12977	ninein protein-like	NINL
GHT09_000964	-1.1575	5.73969	110.691	7.71911e-26	6.74733e-25	6.3404	6.0955	5.21753	4.9275	U3 small nucleolar ribonucleoprotein MPP10	0
GHT09_000965	-1.50141	3.89369	91.4993	1.17585e-21	8.79385e-21	4.5553	4.45601	3.01511	3.03134	methylmalonyl-CoA epimerase mitochondrial	MCEE
GHT09_000972	-6.03025	3.11581	372.395	1.30851e-82	3.92724e-81	4.23294	4.20474	-0.602418	-1.7108	hypothetical protein	0
GHT09_000980	-9.94719	4.53427	961.791	9.32951e-209	1.0597e-206	5.6266	5.61417	-2.5025	-2.05301	ADP-ribosyl cyclase/cyclic ADP-ribose hydrolase 2	BST1
GHT09_000984	4.75721	3.48889	315.092	3.10809e-70	7.49991e-69	-0.16343	-0.154015	4.35927	4.27802	hypothetical protein	0
GHT09_000985	-7.31612	-0.100909	41.8051	1.01966e-10	4.65952e-10	1.2177	0.602018	-2.5025	-2.5025	hypothetical protein	0
GHT09_000986	-1.94252	-0.498391	6.83927	0.0089208	0.0209723	0.381049	-0.154015	-1.10229	-1.4344	hypothetical protein	0
GHT09_000987	-1.08438	3.11762	32.3335	1.30731e-08	5.21377e-08	3.50237	3.69722	2.52851	2.54926	HRAS suppressor 3-like	PLAAT3
GHT09_000996	1.02614	3.95101	43.1541	5.11949e-11	2.38288e-10	3.08178	3.52688	4.39938	4.27802	leucine-rich repeat transmembrane protein FLRT1	FLRT1
GHT09_000999	-3.47953	1.56636	86.7112	1.31586e-20	9.4359e-20	2.56265	2.5488	-0.83081	-0.401522	fermitin family 3	0
GHT09_001011	1.01353	7.08308	120.502	5.37265e-28	5.04136e-27	6.50713	6.45579	7.47028	7.51619	ribosomal protein S6 kinase alpha-4	RPS6KA4
GHT09_001012	3.15205	-0.98067	6.45361	0.0110763	0.0256209	-1.84261	-2.5025	-0.231886	-0.671073	hypothetical protein	0
GHT09_001013	-1.35902	9.45018	264.797	2.36916e-59	4.82731e-58	9.90703	10.0444	8.67652	8.55982	solute carrier family 22 member 11	SLC22A11
GHT09_001014	-10.1765	4.77024	1079.4	1.22121e-232	1.74353e-230	5.67941	6.00104	-2.5025	-2.05301	hypothetical protein	0
GHT09_001015	1.43739	7.58408	259.247	4.46207e-58	8.88051e-57	6.52488	6.83141	8.11898	8.12506	hypothetical protein	0
GHT09_001016	6.13793	-0.701337	15.0534	0.000104675	0.000307167	-2.5025	-2.5025	-0.602418	0.194237	hypothetical protein	0
GHT09_001029	-1.20874	3.58183	51.6454	6.76131e-13	3.46475e-12	4.07545	4.13867	2.62187	3.1089	basic leucine zipper transcriptional factor ATF 2	BATF2
GHT09_001032	1.12753	3.8986	49.9836	1.57498e-12	7.92853e-12	3.26189	3.12773	4.32497	4.29708	sororin	CDCA5
GHT09_001043	1.46446	6.36852	199.791	2.96126e-45	4.46666e-44	5.50181	5.38044	6.79166	7.00185	hypothetical protein	0
GHT09_001046	-1.51631	6.21417	209.174	2.71861e-47	4.31265e-46	6.80921	6.79031	5.36323	5.21743	solute carrier family 25 member 45	SLC25A45
GHT09_001047	2.4039	5.91614	414.595	1.03977e-91	3.58669e-90	4.31683	4.15548	6.59269	6.66839	FERM domain-containing protein 8	FRMD8
GHT09_001048	2.3475	4.53645	247.463	1.3487e-55	2.53687e-54	2.95422	2.82572	5.14074	5.27385	hypothetical protein	0
GHT09_001054	-1.13836	7.56376	167.629	2.89609e-38	3.69818e-37	8.05291	8.00676	6.86868	6.91505	mitogen-activated protein kinase kinase kinase 11	MAP3K11
GHT09_001057	-1.14035	8.13763	179.908	6.18977e-41	8.4108e-40	8.5463	8.65685	7.40693	7.51466	transcription factor p65	RELA
GHT09_001059	-2.06832	6.4655	398.906	2.50355e-88	8.19593e-87	7.13542	7.21983	5.04706	5.17169	AP-5 complex subunit beta-1	AP5B1
GHT09_001067	-1.69784	5.08168	191.882	1.54723e-43	2.22289e-42	5.73869	5.72245	3.9551	4.11033	fos-related antigen 1	FOSL1
GHT09_001073	-1.46294	-0.10771	6.01944	0.0141533	0.0323308	-0.00687362	0.785929	-1.43697	-0.401522	cystatin-M	CST6
GHT09_001080	-1.26065	7.69545	207.703	5.66987e-47	8.93233e-46	8.19723	8.20037	6.935	6.94331	60S ribosomal protein L37	RPL37
GHT09_001082	-1.42835	6.63686	212.009	6.59125e-48	1.06032e-46	7.27828	7.10774	5.65591	5.86542	kinesin light chain 2	KLC2
GHT09_001086	3.81479	6.34122	939.336	5.50597e-204	6.02113e-202	3.61511	3.17794	7.13334	7.27492	transmembrane protein 151A	TMEM151A
GHT09_001087	1.95905	4.18824	155.601	1.20075e-35	1.4253e-34	2.95422	2.76131	4.8633	4.73474	endosialin	CD248
GHT09_001110	1.81171	1.41578	24.5292	7.3483e-07	2.58821e-06	0.381049	0.14419	1.94149	1.92183	hypothetical protein	0
GHT09_001111	2.14384	4.25395	186.374	2.43423e-42	3.39982e-41	2.85567	2.6939	4.91955	4.87137	synaptotagmin-12	SYT12
GHT09_001112	-6.60766	5.28519	1187.32	1.58448e-256	2.60602e-254	6.38878	6.27345	0.307153	-0.283546	rho-related GTP-binding protein RhoD	RHOD
GHT09_001115	-1.47501	1.78106	25.2959	4.93812e-07	1.75767e-06	2.1619	2.59881	1.13857	0.890429	hypothetical protein	0
GHT09_001116	-1.08238	2.38501	20.8205	5.05862e-06	1.664e-05	2.72778	3.0033	1.86717	1.79347	hypothetical protein	0
GHT09_001123	5.80085	2.79462	227.111	3.48526e-51	6.0213e-50	-1.84261	-1.04092	3.51847	3.68761	hypothetical protein	0
GHT09_001133	-1.63364	6.84665	287.853	2.97353e-64	6.5593e-63	7.29625	7.60263	5.82497	5.82823	membrane-associated phosphatidylinositol transfer protein 1	PITPNM1
GHT09_001138	-1.07941	7.99731	159.333	1.84986e-36	2.24109e-35	8.44274	8.44339	7.34752	7.38035	NADH dehydrogenase ubiquinone flavoprotein 1 mitochondrial	NDUFV1
GHT09_001142	-1.84686	3.36814	100.451	1.292e-23	1.03962e-22	3.8887	4.25239	2.07956	2.39856	nucleoside diphosphate-linked moiety X motif 8	NUDT8
GHT09_001146	-4.31491	-0.690324	16.8457	4.06242e-05	0.000123531	-0.00687362	0.391189	-2.5025	-2.05301	aldehyde dehydrogenase family 3 member B1-like	ALDH3B1
GHT09_001148	-2.14017	0.866082	25.952	3.51555e-07	1.26867e-06	1.78726	1.46259	-0.405289	-0.174493	hypothetical protein	0
GHT09_001150	-1.35637	5.59325	145.158	2.25785e-33	2.47966e-32	6.23456	6.04002	4.82455	4.759	choline kinase alpha	CHKA
GHT09_001154	-1.81067	3.0292	79.6389	4.67584e-19	3.13947e-18	3.65082	3.81824	1.90481	2.01688	low-density lipoprotein receptor-related protein 5	LRP5
GHT09_001158	-3.32282	-0.74316	11.948	0.000547601	0.00149193	-0.00687362	0.14419	-1.87352	-2.05301	hypothetical protein	0
GHT09_001159	-2.20052	-0.545063	8.06313	0.00451973	0.0110214	0.490195	-0.329951	-1.87352	-1.20254	hypothetical protein	0
GHT09_001164	-1.4142	2.58223	38.7155	4.95006e-10	2.16897e-09	3.13317	3.22646	2.17507	1.46303	mas-related G-protein coupled receptor member F	MRGPRF
GHT09_001165	-1.37575	5.63065	150.591	1.48007e-34	1.69331e-33	6.01925	6.33191	4.77459	4.84571	two pore calcium channel protein 2	TPCN2
GHT09_001168	1.49899	9.61089	318.998	4.44738e-71	1.09109e-69	8.6898	8.65574	10.1028	10.2365	G1/S-specific cyclin-D1	CCND1
GHT09_001170	7.30662	0.215641	38.9467	4.39773e-10	1.9319e-09	-2.5025	-2.5025	0.860668	0.987501	fibroblast growth factor 19	FGF19
GHT09_001179	5.37812	2.92225	238.656	1.09336e-53	1.97873e-52	-1.39151	-0.763173	3.8815	3.62864	hypothetical protein	0
GHT09_001181	4.91987	3.73318	373.77	6.60764e-83	1.99188e-81	-0.16343	0.00277842	4.65268	4.50401	hypothetical protein	0
GHT09_001182	-7.74984	0.264777	59.2225	1.43948e-14	7.96403e-14	1.60511	1.02414	-2.5025	-2.5025	putative beta-lactamase 1-like	LACTBL1
GHT09_001186	1.12673	7.66165	164.609	1.31475e-37	1.64116e-36	7.05664	6.91026	8.11045	8.11166	heterogeneous nuclear ribonucleoprotein R	HNRNPR
GHT09_001188	-4.85568	-1.69344	5.70815	0.0168908	0.0380145	-1.39151	-0.763173	-2.5025	-2.5025	transcription elongation factor A protein 3	TCEA3
GHT09_001190	1.34149	3.70887	61.5458	4.42968e-15	2.50605e-14	2.83513	2.86711	4.14007	4.19914	hypothetical protein	0
GHT09_001191	1.45575	1.98436	24.8158	6.33329e-07	2.2403e-06	0.591662	1.40754	2.17507	2.6115	hypothetical protein	0
GHT09_001208	-3.19045	2.28415	123.688	1.08322e-28	1.03823e-27	3.1828	3.30387	0.516152	0.0216203	calcipressin-3	RCAN3
GHT09_001212	1.55268	7.42037	292.45	2.44885e-65	5.46645e-64	6.53447	6.33006	7.92482	8.04451	hypothetical protein	0
GHT09_001218	1.18511	4.56762	77.029	1.74812e-18	1.14713e-17	3.9085	3.74241	4.90569	5.08386	low density lipoprotein receptor adapter protein 1	LDLRAP1
GHT09_001219	1.36819	3.59208	59.9478	1.00437e-14	5.59742e-14	2.89591	2.49701	3.83351	4.21927	hypothetical protein	0
GHT09_001220	3.99628	0.319619	29.9127	4.54571e-08	1.74888e-07	-1.39151	-2.5025	0.781941	1.12186	hypothetical protein	0
GHT09_001222	2.49009	0.754722	24.3742	7.96346e-07	2.79817e-06	-1.04838	-0.530361	1.37148	1.32125	hypothetical protein	0
GHT09_001225	-3.00084	3.83848	281.23	6.56122e-63	1.40781e-61	4.75443	4.74957	1.94149	1.71059	membrane progestin receptor alpha	PAQR7
GHT09_001228	-3.53299	-1.17724	7.8753	0.005015	0.0121227	-1.84261	0.272969	-1.87352	-2.5025	exostosin 1	EXT1
GHT09_001231	5.72412	-0.98479	10.7339	0.00105317	0.00277308	-2.5025	-2.5025	-1.43697	0.0216203	hypothetical protein	0
GHT09_001234	-5.95852	0.622249	69.9459	6.28435e-17	3.8729e-16	1.3394	1.99791	-1.87352	-2.5025	connector enhancer of kinase suppressor of ras 1	CNKSR1
GHT09_001238	3.02332	1.71761	63.0559	2.05994e-15	1.18297e-14	-0.539088	-0.154015	2.50419	2.30749	UBX domain-containing protein 11	UBXN11
GHT09_001243	1.4324	3.97567	80.7884	2.61636e-19	1.77758e-18	3.16645	2.92706	4.42551	4.4999	hypothetical protein	0
GHT09_001244	1.32407	6.00573	147.618	6.57368e-34	7.33704e-33	5.21824	5.1399	6.41497	6.57484	hypothetical protein	0
GHT09_001245	1.72519	7.01417	323.872	3.93297e-72	9.83674e-71	5.98002	5.8073	7.62418	7.61349	non-histone chromosomal protein HMG-17	HMGN2
GHT09_001247	1.20092	5.49214	108.183	2.63508e-25	2.24697e-24	4.69296	4.80919	6.10313	5.79005	hypothetical protein	0
GHT09_001248	1.0036	5.89162	84.8933	3.2933e-20	2.3259e-19	5.13245	5.43307	6.30489	6.27777	AT-rich interactive domain-containing protein 1A	ARID1A
GHT09_001249	-1.17951	4.80896	88.5548	5.19133e-21	3.78068e-20	5.20629	5.40875	4.07552	4.18897	GPI mannosyltransferase 2	PIGV
GHT09_001250	-2.26497	4.83627	292.571	2.30601e-65	5.15879e-64	5.59945	5.62928	3.23792	3.46128	palmitoyltransferase ZDHHC18	ZDHHC18
GHT09_001251	-4.41003	3.70752	413.291	1.98606e-91	6.82798e-90	4.91965	4.54159	0.781941	0.273371	14-3-3 protein sigma	SFN
GHT09_001252	-1.37332	5.39336	141.685	1.28934e-32	1.38566e-31	6.00092	5.89497	4.48884	4.65571	GPN-loop GTPase 2	GPN2
GHT09_001255	-5.5765	0.291537	52.2218	5.04321e-13	2.60249e-12	0.938376	1.66392	-1.87352	-2.5025	keratinocyte differentiation factor 1	KDF1
GHT09_001256	1.37749	4.57124	101.73	6.7855e-24	5.51832e-23	3.55357	3.81824	4.91495	5.17169	protein FAM46B	TENT5B
GHT09_001260	1.03462	7.17614	128.15	1.15157e-29	1.13877e-28	6.58302	6.53818	7.5204	7.66163	WD and tetratricopeptide repeats protein 1	WDTC1
GHT09_001261	-1.82528	2.30151	52.0316	5.55545e-13	2.86324e-12	2.99183	3.03996	1.61802	0.939781	transmembrane protein 222	TMEM222
GHT09_001262	-3.22444	4.51662	439.744	3.97713e-97	1.48936e-95	5.33624	5.53612	2.37605	2.16949	mitogen-activated protein kinase kinase kinase 6	MAP3K6
GHT09_001263	5.18203	-1.33334	6.82593	0.00898766	0.021115	-2.5025	-2.5025	-0.405289	-1.20254	hypothetical protein	0
GHT09_001274	-3.60917	3.60889	317.588	1.12036e-70	2.72586e-69	4.49109	4.69314	0.516152	1.39388	hypothetical protein	0
GHT09_001276	1.12547	7.0934	147.839	5.88291e-34	6.57319e-33	6.40977	6.42147	7.53247	7.54637	eyes absent 3	EYA3
GHT09_001277	1.20438	7.72031	188.675	8.50587e-43	1.20022e-41	6.89855	7.07609	8.06649	8.3068	platelet-activating factor receptor	PTAFR
GHT09_001280	2.08876	6.46991	390.743	2.93396e-86	9.27988e-85	5.14919	4.96029	6.96537	7.29106	sestrin-2	SESN2
GHT09_001284	1.03027	4.71083	62.9093	2.23864e-15	1.28201e-14	4.25631	3.88021	4.98252	5.20234	tRNA selenocysteine 1-associated protein 1	TRNAU1AP
GHT09_001291	-1.38624	0.459543	8.88465	0.00287746	0.00718368	0.68646	1.29071	0.190081	-0.530011	transmembrane protein 200B	TMEM200B
GHT09_001295	3.23797	-0.921082	7.09862	0.00771735	0.0182705	-2.5025	-1.83829	-0.602418	-0.283546	hypothetical protein	0
GHT09_001298	-5.57267	-1.32974	10.1862	0.00141599	0.00367323	-1.04838	-0.154015	-2.5025	-2.5025	hypothetical protein	0
GHT09_001299	-6.97707	2.36621	250.939	3.15682e-56	6.04294e-55	3.1499	3.7754	-2.5025	-1.7108	hypothetical protein	0
GHT09_001305	13.2674	5.81805	1430.99	7.60311e-308	1.77628e-305	-2.5025	-2.5025	6.79542	6.73979	beta-secretase 2	BACE2
GHT09_001308	3.8924	7.64877	1415.06	1.6841e-304	3.84704e-302	4.53634	4.76608	8.50791	8.56892	hypothetical protein	0
GHT09_001313	-2.5393	0.20589	20.6652	5.48571e-06	1.79988e-05	1.2177	0.785929	-1.10229	-1.00283	serine incorporator 2	SERINC2
GHT09_001314	-8.11134	2.66362	314.578	4.01482e-70	9.66519e-69	3.75292	3.8392	-2.5025	-2.05301	hypothetical protein	0
GHT09_001318	-4.75057	4.77711	768.813	1.32587e-165	1.06896e-163	5.53721	6.01952	1.20041	1.12186	hypothetical protein	0
GHT09_001319	-5.62929	1.58268	135.174	3.8812e-31	4.01982e-30	2.09436	3.1106	-1.87352	-1.7108	hypothetical protein	0
GHT09_001320	6.29462	2.37527	179.818	6.47417e-41	8.78564e-40	-1.84261	-1.83829	3.09869	3.25254	hypothetical protein	0
GHT09_001321	4.37462	1.47661	77.6614	1.28647e-18	8.49346e-18	-0.771375	-2.5025	2.20555	2.23025	hypothetical protein	0
GHT09_001322	6.15181	1.42092	91.9519	9.35885e-22	7.01965e-21	-1.84261	-2.5025	2.29332	2.12751	hypothetical protein	0
GHT09_001323	5.0158	-1.41803	5.98677	0.0144177	0.0328619	-2.5025	-2.5025	-1.43697	-0.671073	hypothetical protein	0
GHT09_001331	3.15692	-0.979995	6.47784	0.0109264	0.0252967	-1.84261	-2.5025	-0.0771072	-0.827436	doublecortin domain-containing protein 2B	DCDC2B
GHT09_001339	1.74563	-0.145447	6.67196	0.00979755	0.0228298	-1.04838	-1.04092	0.781941	-0.174493	hypothetical protein	0
GHT09_001348	4.1499	1.56945	79.0778	6.20819e-19	4.14935e-18	-1.84261	-0.763173	2.07956	2.45056	fibronectin type III domain-containing protein 5-like	FNDC5
GHT09_001349	3.00158	1.326	47.5662	5.39454e-12	2.63435e-11	-0.771375	-0.530361	1.94149	2.01688	transmembrane protein 54	TMEM54
GHT09_001352	3.28158	3.72184	250.224	3.40091e-56	6.49807e-55	1.27983	1.29071	4.36603	4.56426	antizyme inhibitor 2	AZIN2
GHT09_001354	5.09368	4.59653	633.04	1.22567e-138	7.47729e-137	0.591662	0.500452	5.57358	5.37599	zinc finger protein 362	ZNF362
GHT09_001357	-6.37551	0.993568	94.7639	2.26784e-22	1.73778e-21	2.28819	1.88153	-2.5025	-2.05301	lysosomal-associated transmembrane protein 5	LAPTM5
GHT09_001360	1.75644	1.67257	27.7459	1.39033e-07	5.16979e-07	0.591662	0.500452	2.17507	2.19003	2'-5'-oligoadenylate synthase protein 2-like	OASL2
GHT09_001361	-6.13761	0.782311	79.7833	4.40894e-19	2.96511e-18	2.22643	1.40754	-1.87352	-2.5025	2'-5'-oligoadenylate synthase protein 1	OAS1
GHT09_001363	-2.44775	6.06752	471.107	7.06088e-104	2.85757e-102	6.77051	6.93237	4.45118	4.38434	hepatocyte nuclear factor 1-alpha	HNF1A
GHT09_001365	-1.48844	6.69379	232.685	2.155e-52	3.80952e-51	7.21509	7.32012	5.68324	5.86702	short-chain specific acyl-CoA dehydrogenase mitochondrial	ACADS
GHT09_001378	-1.52156	-0.287795	5.43263	0.0197687	0.0440282	-0.00687362	0.500452	-0.405289	-1.4344	hypothetical protein	0
GHT09_001379	2.1557	8.3927	602.1	5.22535e-132	2.89563e-130	6.92674	6.95174	9.034	9.14973	paxillin	PXN
GHT09_001386	1.35777	5.31554	129.447	6.00175e-30	5.99563e-29	4.47126	4.44921	5.89444	5.7317	hypothetical protein	0
GHT09_001387	1.06536	4.68494	66.2466	4.08978e-16	2.42941e-15	4.04893	4.01522	5.13679	5.04774	hypothetical protein	0
GHT09_001397	-6.49957	2.41695	252.053	1.36568e-56	2.62893e-55	3.60301	3.47428	-2.5025	-1.4344	ras-related protein Rab-38	RAB38
GHT09_001398	-1.28446	7.66311	214.389	2.00622e-48	3.27348e-47	8.17288	8.17433	6.90629	6.87518	hypothetical protein	0
GHT09_001399	-1.39453	5.44764	147.548	6.80944e-34	7.59606e-33	6.00323	6.01262	4.66918	4.57601	UDP-glucuronic acid decarboxylase 1	UXS1
GHT09_001400	-1.31328	6.19678	157.999	5.13312e-36	6.14271e-35	6.74596	6.70156	5.65867	5.15611	GRIP and coiled-coil domain-containing protein 2	GCC2
GHT09_001401	-1.59027	7.90256	331.429	9.15866e-74	2.37444e-72	8.49647	8.49422	7.02961	6.78015	E3 SUMO-protein ligase RanBP2	RANBP2
GHT09_001404	-1.16728	3.01892	34.9894	3.34127e-09	1.38662e-08	3.54094	3.52688	2.62187	2.19003	hypothetical protein	0
GHT09_001405	-1.40752	5.80454	163.43	2.37347e-37	2.94307e-36	6.24433	6.476	4.97369	4.95176	formin-binding protein 1	FNBP1
GHT09_001411	-6.14743	-0.974727	16.2476	5.56808e-05	0.000167556	-0.339066	0.14419	-2.5025	-2.5025	prostaglandin E synthase	PTGES
GHT09_001417	6.29253	-0.599401	16.9975	3.75016e-05	0.00011451	-2.5025	-2.5025	0.190081	-0.0731063	hypothetical protein	0
GHT09_001422	1.50379	8.15214	303.216	1.14886e-67	2.67793e-66	7.22203	7.19261	8.70481	8.71538	endophilin-B2	SH3GLB2
GHT09_001427	-1.24805	7.37928	194.712	4.06377e-44	5.94218e-43	7.74271	8.00561	6.67533	6.59327	hypothetical protein	0
GHT09_001437	1.3104	7.11421	198.763	4.95128e-45	7.42476e-44	6.21283	6.39341	7.50746	7.71044	hypothetical protein	0
GHT09_001440	-2.73728	5.31304	463.654	2.83498e-102	1.13174e-100	6.10112	6.21052	3.50627	3.38316	putative inactive glycosyltransferase 25 family member 3	0
GHT09_001445	2.34995	1.62138	42.1584	8.51271e-11	3.91003e-10	-0.16343	0.272969	2.29332	2.16949	hypothetical protein	0
GHT09_001446	2.03586	0.24659	12.2387	0.000468567	0.00128598	-0.339066	-1.83829	0.781941	0.731355	hypothetical protein	0
GHT09_001447	1.21532	6.38035	141.157	1.68091e-32	1.80177e-31	5.53721	5.72808	6.85793	6.83905	cip1-interacting zinc finger protein	CIZ1
GHT09_001463	5.58424	3.12303	277.846	3.54365e-62	7.49526e-61	-1.04838	-1.04092	3.91877	3.98074	SH2 domain-containing protein 3C	SH2D3C
GHT09_001464	2.79526	2.3945	90.3766	2.07112e-21	1.53387e-20	0.381049	0.500452	3.29573	2.8752	hypothetical protein	0
GHT09_001469	1.5816	10.3382	355.843	4.88637e-79	1.38183e-77	9.36276	9.31565	10.8399	10.9969	niban protein 1-like	NIBAN2
GHT09_001474	-1.67491	2.29466	44.6893	2.33857e-11	1.10602e-10	2.81429	3.1106	1.25972	1.42887	hypothetical protein	0
GHT09_001477	-1.24147	5.02025	104.509	1.67429e-24	1.39303e-23	5.4214	5.64722	4.43197	4.18897	zinc finger and BTB domain-containing protein 34	ZBTB34
GHT09_001491	1.20996	4.8525	89.6518	2.98515e-21	2.19734e-20	4.12707	4.06943	5.27974	5.31884	golgin subfamily A member 1	GOLGA1
GHT09_001507	-1.87728	5.48869	258.172	6.4506e-58	1.2764e-56	6.19076	6.15729	4.24652	4.3528	hypothetical protein	0
GHT09_001523	-5.2582	-1.50024	7.89698	0.00495407	0.0119978	-1.04838	-0.530361	-2.5025	-2.5025	hypothetical protein	0
GHT09_001524	-4.20354	2.10562	151.426	2.79503e-34	3.15905e-33	2.45904	3.62667	-0.602418	-0.671073	hypothetical protein	0
GHT09_001527	-8.61619	1.04294	108.229	2.57473e-25	2.19642e-24	1.94896	2.35874	-2.5025	-2.5025	solute carrier family 22 member 24-like	0
GHT09_001528	-9.86407	6.79917	2400.93	0	0	7.7578	7.8905	-0.83081	-1.7108	solute carrier family 22 member 9-like	SLC22A9
GHT09_001529	-6.87657	-0.451131	29.3462	6.10226e-08	2.32413e-07	-0.16343	1.02414	-2.5025	-2.5025	hypothetical protein	0
GHT09_001531	-3.87477	-0.974807	11.0724	0.00087697	0.00233363	-0.539088	0.14419	-1.87352	-2.5025	hypothetical protein	0
GHT09_001532	-2.85037	0.721794	36.3508	1.6802e-09	7.10619e-09	0.938376	2.07059	-0.231886	-1.4344	solute carrier family 22 member 8	SLC22A8
GHT09_001540	5.8415	3.12297	284.508	1.28096e-63	2.78976e-62	-1.04838	-1.38521	3.92794	3.98074	hypothetical protein	0
GHT09_001546	2.59329	2.39609	81.6364	1.70497e-19	1.16492e-18	0.938376	0.14419	3.13081	2.98507	LRRN4 C-terminal protein-like	LRRN4CL
GHT09_001548	1.1592	3.12102	33.8396	6.02894e-09	2.45882e-08	2.12852	2.62317	3.60104	3.46971	methyltransferase protein 12 mitochondrial-like	CSKMT
GHT09_001556	-1.18728	4.3355	73.7152	9.33509e-18	5.9547e-17	4.79754	4.89174	3.63504	3.69482	hypothetical protein	0
GHT09_001558	1.82087	6.72757	331.148	1.05345e-73	2.72425e-72	5.55617	5.51022	7.37962	7.32222	inner centromere protein	INCENP
GHT09_001561	-4.55124	1.24827	91.9984	9.14227e-22	6.86221e-21	2.25764	2.35874	-1.43697	-1.4344	bestrophin-1	BEST1
GHT09_001568	1.03031	9.35516	153.959	2.73502e-35	3.1858e-34	8.78191	8.71362	9.74592	9.80947	hypothetical protein	0
GHT09_001571	5.84706	-0.919153	11.7741	0.000601199	0.00163212	-2.5025	-2.5025	0.0626637	-0.671073	hypothetical protein	0
GHT09_001583	-6.05157	0.704582	74.9558	5.08529e-18	3.2815e-17	1.2177	2.2058	-1.87352	-2.5025	von Willebrand factor C and EGF domain-containing protein	VWCE
GHT09_001591	1.43268	4.23596	92.9813	5.56968e-22	4.21757e-21	3.24642	3.37733	4.64157	4.80301	solute carrier family 15 member 3	SLC15A3
GHT09_001603	2.09463	4.00484	156.747	6.75983e-36	8.07058e-35	2.45904	2.6707	4.70696	4.56426	hypothetical protein	0
GHT09_001605	-1.14939	1.41229	12.4808	0.000411611	0.00113542	2.05936	1.75494	0.610295	0.987501	hypothetical protein	0
GHT09_001613	-1.43348	6.99334	232.411	2.07631e-51	3.61446e-50	7.31862	7.7489	6.23273	6.00528	NF-kappa-B inhibitor zeta	NFKBIZ
GHT09_001614	-6.6273	-0.638636	23.99	9.72041e-07	3.3906e-06	-0.339066	0.785929	-2.5025	-2.5025	hypothetical protein	0
GHT09_001615	-4.58736	-0.496634	21.6969	3.20311e-06	1.07269e-05	0.68646	0.14419	-2.5025	-2.05301	hypothetical protein	0
GHT09_001616	-4.06989	-0.85466	13.3493	0.000258835	0.000729401	-0.00687362	0.00277842	-2.5025	-2.05301	hypothetical protein	0
GHT09_001617	1.01513	5.79553	84.8342	3.39297e-20	2.39464e-19	5.12823	5.24176	6.24928	6.1486	BTB/POZ domain-containing protein 7	BTBD7
GHT09_001620	1.15178	4.20023	61.3127	4.98546e-15	2.81354e-14	3.63901	3.30387	4.54356	4.68495	modulator of apoptosis 1	MOAP1
GHT09_001623	5.44411	-1.18094	8.44938	0.00365362	0.00903365	-2.5025	-2.5025	-0.0771072	-1.20254	hypothetical protein	0
GHT09_001627	1.29566	6.41213	160.98	8.10259e-37	9.92737e-36	5.61459	5.60502	6.80914	6.98578	ras and Rab interactor 3	RIN3
GHT09_001637	4.46007	4.51005	543.347	4.695e-119	2.3092e-117	0.381049	1.46259	5.41632	5.31183	hypothetical protein	0
GHT09_001638	3.45289	0.676669	34.4029	4.51483e-09	1.85827e-08	-1.84261	-1.04092	1.37148	1.32125	hypothetical protein	0
GHT09_001639	-1.15316	4.35738	70.4723	4.81474e-17	2.98511e-16	4.73792	4.96506	3.63504	3.77178	interferon alpha-inducible protein 27 protein 2-like	IFI27L2
GHT09_001645	-5.25836	4.05748	586.4	1.21446e-128	6.48519e-127	5.06788	5.16501	0.415434	-0.174493	ankyrin repeat and SOCS box protein 2	ASB2
GHT09_001650	2.18387	4.15851	182.353	2.25411e-41	3.08743e-40	2.43194	2.84656	5.02587	4.58767	zinc finger protein Helios	IKZF2
GHT09_001657	1.17736	6.76423	148.506	4.21168e-34	4.72384e-33	6.08815	6.008	7.23103	7.2173	protein Shroom2	SHROOM2
GHT09_001665	-1.11729	5.516	98.7025	3.11685e-23	2.46934e-22	6.03735	5.94173	4.68007	5.0279	apoptosis-enhancing nuclease	AEN
GHT09_001668	-1.47846	3.08168	57.1492	4.12353e-14	2.23212e-13	3.61511	3.7754	1.86717	2.48422	hyaluronan and proteoglycan link protein 3	HAPLN3
GHT09_001669	-1.64519	8.48048	372.041	1.55955e-82	4.6603e-81	9.04964	9.1206	7.33033	7.53989	lactadherin	MFGE8
GHT09_001680	1.39277	1.2312	13.8023	0.00020336	0.000581002	-0.16343	0.785929	1.74797	1.59211	hypothetical protein	0
GHT09_001681	5.29848	-1.25785	7.5444	0.00602232	0.0144237	-2.5025	-2.5025	-1.10229	-0.530011	hypothetical protein	0
GHT09_001683	-2.27788	9.18224	693.759	1.23933e-151	8.60787e-150	9.90225	9.92917	7.63192	7.64545	aminopeptidase N	ANPEP
GHT09_001690	-1.08163	1.82382	14.4323	0.000145497	0.000421364	2.48565	2.1056	1.42428	1.16401	GDP-D-glucose phosphorylase 1	GDPGP1
GHT09_001697	-1.46784	4.53175	119.935	7.14388e-28	6.69116e-27	5.05905	5.18969	3.71137	3.63614	guanosine-3' 5'-bis(diphosphate) 3'-pyrophosphohydrolase MESH1	HDDC3
GHT09_001699	1.16935	0.494183	5.85288	0.0155559	0.0352723	0.134344	-0.530361	1.0063	0.731355	tyrosine-protein kinase Fes/Fps	FES
GHT09_001702	1.19164	1.88461	16.2341	5.60791e-05	0.000168606	1.2177	1.09554	2.57595	2.01688	hypothetical protein	0
GHT09_001706	-1.83246	2.91333	75.5547	3.68305e-18	2.38939e-17	3.54094	3.70866	1.94149	1.76637	zinc finger and SCAN domain-containing protein 2	ZSCAN2
GHT09_001709	-8.17961	0.64336	80.1848	3.62149e-19	2.44352e-18	1.27983	2.1056	-2.5025	-2.5025	neuromedin-B	NMB
GHT09_001712	4.83975	0.269561	33.448	7.37235e-09	2.98951e-08	-2.5025	-1.83829	0.93532	0.987501	hypothetical protein	0
GHT09_001716	-2.82706	-0.138308	17.5812	2.75872e-05	8.53887e-05	0.68646	0.696902	-1.43697	-1.4344	prestin	SLC26A5
GHT09_001719	-1.21333	1.48406	14.5209	0.000138816	0.000402527	2.09436	1.92138	0.698669	0.987501	N-acyl-phosphatidylethanolamine-hydrolyzing phospholipase D	NAPEPLD
GHT09_001721	-7.58562	0.123447	51.9961	5.76208e-13	2.96527e-12	0.490195	1.66392	-2.5025	-2.5025	leucine-rich repeat-containing protein 17	LRRC17
GHT09_001735	2.03037	2.71963	69.1904	9.21175e-17	5.64484e-16	1.27983	1.40754	3.28149	3.31932	putative 8-oxo-dGTP diphosphatase NUDT15	0
GHT09_001736	1.15307	4.11164	58.6078	1.96653e-14	1.08015e-13	3.51534	3.25792	4.54356	4.52438	mediator of RNA polymerase II transcription subunit 4	MED4
GHT09_001738	1.68276	4.97725	170.545	6.7248e-39	8.71723e-38	3.95685	3.78623	5.62241	5.47347	retinoblastoma-associated protein	RB1
GHT09_001739	2.34861	4.28754	218.729	2.29438e-49	3.84121e-48	2.45904	2.80457	4.94687	4.96969	RCC1 and BTB domain-containing protein 2	RCBTB2
GHT09_001749	4.62234	4.69797	616.584	4.11002e-135	2.37354e-133	1.01344	1.09554	5.63926	5.49013	hepatoma-derived growth factor-related protein 3	HDGFL3
GHT09_001750	-1.06649	3.53778	39.5951	3.15605e-10	1.39538e-09	4.16048	3.84956	2.87041	3.03134	UPF0235 protein C15orf40-like	C15ORF40
GHT09_001751	3.43042	5.54728	628.637	1.07556e-137	6.42804e-136	3.1499	2.76131	6.45833	6.28614	homer protein 2	0
GHT09_001752	-1.04886	4.03824	50.1124	1.47505e-12	7.43804e-12	4.59861	4.40071	3.48158	3.45281	WASP protein with actin membranes and microtubules	0
GHT09_001753	-3.10225	-0.497494	14.11	0.000172664	0.000496336	0.77541	-0.329951	-1.87352	-1.7108	fibronectin type III and SPRY domain-containing protein 2	FSD2
GHT09_001756	-2.27103	1.1686	35.8442	2.16745e-09	9.10886e-09	2.37614	1.40754	-0.602418	0.194237	cytoplasmic polyadenylation element-binding protein 1	CPEB1
GHT09_001757	-1.34162	8.75529	254.482	4.06403e-57	7.93471e-56	9.2955	9.2626	7.84659	8.02142	40S ribosomal protein S17	RPS17
GHT09_001763	-1.30422	8.92697	241.985	2.07576e-54	3.80014e-53	9.43002	9.44878	8.16042	8.11133	myotrophin	MTPN
GHT09_001767	-1.17735	6.27533	131.781	1.85887e-30	1.88258e-29	6.76645	6.75629	5.60251	5.57262	protein AF-9	MLLT3
GHT09_001768	2.61651	4.05366	226.168	5.58387e-51	9.59053e-50	2.25764	2.1056	4.77967	4.73474	hypothetical protein	0
GHT09_001769	-10.8018	3.18362	452.139	8.52723e-100	3.32029e-98	4.36061	4.26018	-2.5025	-2.5025	very-long-chain (3R)-3-hydroxyacyl-CoA dehydratase 4	HACD4
GHT09_001773	-1.50178	6.08879	197.657	8.60901e-45	1.28255e-43	6.69414	6.64913	5.24347	5.11104	kelch protein 9-like	KLHL9
GHT09_001789	-2.98825	9.25083	1119.04	4.30692e-242	6.51073e-240	10.1709	9.99177	7.07572	7.11762	cyclin-dependent kinase inhibitor 2A-like	CDKN2A
GHT09_001791	5.02624	-1.41668	6.02146	0.014137	0.0322997	-2.5025	-2.5025	-0.83081	-1.00283	doublesex- and mab-3-related transcription factor A1	DMRTA1
GHT09_001797	5.87544	5.76695	1147.75	3.64801e-248	5.81392e-246	1.15278	0.696902	6.69695	6.68657	glia-derived nexin	SERPINE2
GHT09_001801	1.22106	2.08286	19.448	1.03639e-05	3.32146e-05	1.50462	1.09554	2.1121	2.71434	nucleoside diphosphate kinase 5	0
GHT09_001805	1.31668	6.24694	157.579	4.45495e-36	5.34048e-35	5.45208	5.40524	6.7522	6.73281	hypothetical protein	0
GHT09_001807	1.71885	6.13167	247.97	1.04704e-55	1.9785e-54	5.07228	4.95069	6.85312	6.59616	adenomatous polyposis coli protein	APC
GHT09_001812	-1.11463	4.93879	82.9806	8.90644e-20	6.14773e-19	5.1821	5.62023	4.28984	4.32521	pecanex protein 4	PCNX4
GHT09_001813	-1.82652	5.99411	276.34	7.50698e-62	1.57808e-60	6.66097	6.65948	4.84406	4.83597	dehydrogenase/reductase SDR family member 7	DHRS7
GHT09_001821	2.14133	4.10379	171.624	3.9178e-39	5.12156e-38	2.43194	2.80457	4.8147	4.67406	cell adhesion molecule-related/down-regulated by oncogenes	CDON
GHT09_001828	-5.42377	-1.41251	9.02926	0.00265852	0.00667113	-0.539088	-0.763173	-2.5025	-2.5025	neuromodulin	GAP43
GHT09_001829	1.72207	3.87533	105.205	1.1792e-24	9.84292e-24	2.53743	2.90735	4.50732	4.36188	hypothetical protein	0
GHT09_001833	-2.42271	1.08417	37.0887	1.13873e-09	4.86114e-09	1.74383	2.07059	0.190081	-0.671073	hypothetical protein	0
GHT09_001834	-8.88346	6.78508	2334.86	0	0	7.79882	7.82176	-0.602418	-0.671073	interferon-inducible protein AIM2	AIM2
GHT09_001835	3.04437	-1.04499	5.74869	0.0165053	0.0373222	-2.5025	-1.83829	-0.405289	-0.671073	cell adhesion molecule 3	CADM3
GHT09_001836	-5.42377	-1.41251	9.02926	0.00265852	0.00667113	-0.539088	-0.763173	-2.5025	-2.5025	atypical chemokine receptor 1	ACKR1
GHT09_001846	-1.62526	1.16497	20.0733	7.47307e-06	2.42486e-05	1.87037	1.75494	-0.0771072	0.552542	C-reactive protein	CRP
GHT09_001851	3.08082	0.390552	24.0699	9.33804e-07	3.26276e-06	-1.84261	-1.04092	0.307153	1.35802	hypothetical protein	0
GHT09_001866	-4.85546	-1.69346	5.70752	0.0168968	0.0380145	-0.771375	-1.38521	-2.5025	-2.5025	SLAM family member 5	CD84
GHT09_001868	6.49643	1.73997	117.388	2.56957e-27	2.35944e-26	-2.5025	-1.83829	2.59909	2.48422	dual adapter for phosphotyrosine and 3-phosphotyrosine and 3-phosphoinositide	DAPP1
GHT09_001874	1.55297	5.92699	194.424	4.33699e-44	6.33718e-43	5.00029	4.86133	6.56944	6.39188	homeobox protein SIX1	SIX1
GHT09_001877	-1.61306	4.28819	128.276	1.08072e-29	1.06974e-28	4.89505	4.96029	3.13081	3.46971	major facilitator superfamily domain-containing protein 6	MFSD6
GHT09_001878	-2.22593	1.39988	40.5538	1.93288e-10	8.68024e-10	2.37614	1.99791	0.610295	-0.283546	hypothetical protein	0
GHT09_001880	-1.27565	4.50216	90.8825	1.60479e-21	1.19323e-20	5.10697	4.96506	3.87202	3.68761	hypothetical protein	0
GHT09_001882	-1.99085	8.29604	524.542	2.29914e-115	1.08662e-113	8.95879	8.99756	7.11338	6.86084	glutaminase kidney	GLS
GHT09_001886	-2.08295	5.14051	280.749	8.33678e-63	1.77981e-61	5.99862	5.74205	3.77373	3.83184	SOSS complex subunit B2	NABP1
GHT09_001887	1.16774	3.73469	48.4324	3.46986e-12	1.71113e-11	3.09911	2.90735	4.33879	3.98663	serum deprivation-response protein	CAVIN2
GHT09_001892	10.8238	3.47188	410.88	6.5703e-91	2.2364e-89	-2.5025	-2.5025	4.17129	4.45817	polymeric immunoglobulin receptor	PIGR
GHT09_001894	-2.12584	5.43906	316.05	3.94677e-70	9.51251e-69	5.96592	6.36118	4.19428	3.94493	ubiquitin thioesterase OTU1	YOD1
GHT09_001895	-1.57834	3.0176	61.7374	4.01952e-15	2.27965e-14	3.73085	3.59005	2.1121	2.12751	6-phosphofructo-2-kinase/fructose-2 6-bisphosphatase 2	PFKFB2
GHT09_001897	-4.08481	2.77963	223.177	2.48654e-50	4.22836e-49	3.9183	3.70866	-0.231886	0.110509	C4b-binding protein alpha chain-like	C4BPA
GHT09_001904	-1.76619	0.459766	13.8433	0.000198965	0.000568917	1.01344	1.22854	-0.231886	-0.530011	signal peptide CUB and EGF domain-containing protein 2-like	SCUBE2
GHT09_001905	-5.93825	1.36881	120.579	5.16681e-28	4.85486e-27	2.28819	2.64713	-2.5025	-1.7108	nuclear receptor-interacting protein 3	NRIP3
GHT09_001906	1.09067	3.00123	28.0933	1.16201e-07	4.34202e-07	2.19453	2.44328	3.41792	3.36521	hypothetical protein	0
GHT09_001913	-1.05604	4.0777	51.8495	6.09455e-13	3.13166e-12	4.73792	4.32102	3.50627	3.49469	hypothetical protein	0
GHT09_001916	4.41735	2.58807	166.537	5.00685e-38	6.33062e-37	-1.04838	-0.329951	3.13081	3.52735	carbohydrate sulfotransferase 7	CHST7
GHT09_001919	1.00193	8.67156	143.194	6.0463e-33	6.55276e-32	7.95276	8.20189	9.07533	9.09274	procollagen-lysine 2-oxoglutarate 5-dioxygenase 1	PLOD1
GHT09_001925	5.18203	-1.33334	6.82593	0.00898766	0.021115	-2.5025	-2.5025	-0.405289	-1.20254	hypothetical protein	0
GHT09_001930	1.64136	2.3254	38.3067	6.10235e-10	2.65458e-09	1.08479	1.40754	2.70956	2.91276	F-box only protein 2	FBXO2
GHT09_001939	-7.35796	-0.0666611	43.226	4.93497e-11	2.29803e-10	1.01344	0.949025	-2.5025	-2.5025	hypothetical protein	0
GHT09_001941	-5.41599	0.152092	45.5459	1.51081e-11	7.22678e-11	0.68646	1.56676	-2.5025	-2.05301	hypothetical protein	0
GHT09_001944	5.43406	-1.1823	8.40272	0.00374858	0.00924953	-2.5025	-2.5025	-0.405289	-0.827436	hypothetical protein	0
GHT09_001950	2.10892	-0.337511	7.41662	0.00646515	0.0154375	-1.39151	-1.38521	-0.0771072	0.273371	hypothetical protein	0
GHT09_001956	-1.33279	1.63115	19.0403	1.28297e-05	4.08938e-05	1.78726	2.52314	1.13857	0.786352	hypothetical protein	0
GHT09_001957	7.17888	0.104239	35.0632	3.21712e-09	1.33618e-08	-2.5025	-2.5025	0.860668	0.786352	putative G-protein coupled receptor 157	0
GHT09_001963	-1.14623	7.20029	159.278	2.24618e-36	2.71482e-35	7.49021	7.8316	6.46149	6.5836	leukemia inhibitory factor	LIF
GHT09_001965	-1.43337	4.87468	131.138	2.56828e-30	2.58323e-29	5.31414	5.58345	3.91877	4.11571	GATS protein 3-like	CASTOR1
GHT09_001969	1.28068	2.08081	21.1769	4.20034e-06	1.39304e-05	1.27983	1.29071	2.70956	2.32617	hypothetical protein	0
GHT09_001970	1.48235	5.03285	138.822	5.42491e-32	5.71074e-31	3.99439	4.1638	5.53209	5.57458	thyroid hormone receptor alpha	THRA
GHT09_001971	2.04379	6.09729	332.903	1.09876e-73	2.83786e-72	4.43075	4.96029	6.71427	6.79447	nuclear receptor subfamily 1 group D member 1	NR1D1
GHT09_001975	1.73437	0.193184	9.04819	0.00263113	0.00662099	-1.39151	-0.329951	0.698669	0.614642	hypothetical protein	0
GHT09_001976	2.67019	2.51321	91.5334	1.15578e-21	8.64692e-21	0.134344	1.02414	3.25259	3.11965	hypothetical protein	0
GHT09_001983	-1.40672	4.00252	86.0501	1.83689e-20	1.30764e-19	4.50416	4.66408	3.1466	3.23287	hypothetical protein	0
GHT09_001992	1.21701	3.49816	45.9983	1.19953e-11	5.77276e-11	2.63574	2.82572	4.06724	3.80546	hypothetical protein	0
GHT09_001996	1.13578	3.93169	51.6841	6.62976e-13	3.39819e-12	3.04647	3.37733	4.15577	4.48336	hypothetical protein	0
GHT09_001999	-10.0382	4.62793	1009.08	8.54533e-219	1.09802e-216	5.64442	5.77505	-2.5025	-2.05301	hypothetical protein	0
GHT09_002002	2.724	7.43452	791.782	6.28146e-168	5.12463e-166	5.22615	5.72527	8.2486	8.18417	hypothetical protein	0
GHT09_002003	3.55128	8.24823	1366.33	2.94608e-294	6.05684e-292	5.51801	5.62627	9.06576	9.17103	hypothetical protein	0
GHT09_002008	4.66633	7.87755	1865.38	0	0	4.06667	4.23668	8.74816	8.86319	hypothetical protein	0
GHT09_002012	1.40412	5.64471	150.824	1.31689e-34	1.50914e-33	4.74345	4.77154	6.14305	6.16815	hypothetical protein	0
GHT09_002013	1.16635	4.89717	85.0766	3.00229e-20	2.12402e-19	3.96633	4.35779	5.33248	5.33507	hypothetical protein	0
GHT09_002024	-4.72019	1.8436	141.383	1.50022e-32	1.6106e-31	2.79314	3.03996	-1.43697	-1.00283	nicotinamide N-methyltransferase	NNMT
GHT09_002033	-1.04956	4.58944	65.0389	7.54035e-16	4.42162e-15	5.12823	4.96506	4.02514	3.99249	Golgi-associated plant pathogenesis-related protein 1	GLIPR2
GHT09_002034	-2.48475	2.39522	92.5846	6.80284e-22	5.13058e-21	3.29235	3.21047	0.860668	0.890429	reversion-inducing cysteine-rich protein with Kazal motifs	RECK
GHT09_002041	-1.27554	2.60225	32.3952	1.26653e-08	5.05409e-08	3.08178	3.22646	1.97727	1.87185	transmembrane protein 8B	TMEM8B
GHT09_002042	-2.8268	5.33764	492.03	2.23266e-108	9.66342e-107	6.33126	6.04228	3.30983	3.44428	histidine triad nucleotide-binding protein 2 mitochondrial	HINT2
GHT09_002045	10.4039	3.06261	316.114	1.8691e-70	4.53147e-69	-2.5025	-2.5025	3.96405	3.87688	prostate-associated microseminoprotein	MSMP
GHT09_002050	3.72372	4.1793	380.109	2.83369e-84	8.65643e-83	1.15278	1.51561	4.84889	5.08386	carbonic anhydrase 9	CA9
GHT09_002052	-1.93584	3.96229	150.036	1.95524e-34	2.22703e-33	4.61677	4.75509	2.75149	2.79701	coiled-coil domain-containing protein 107	CCDC107
GHT09_002056	-2.33955	5.4286	371.312	2.24064e-82	6.65684e-81	6.16218	6.25018	3.99055	3.78535	iporin	RUSC2
GHT09_002057	-3.48682	-0.640171	14.1545	0.000168623	0.000485197	-0.16343	0.500452	-2.5025	-1.7108	hypothetical protein	0
GHT09_002060	-2.59989	3.03866	145.699	1.7208e-33	1.8939e-32	3.97574	3.8392	1.47521	1.32125	hypothetical protein	0
GHT09_002061	-1.35617	4.0942	84.2933	4.45807e-20	3.12277e-19	4.71562	4.60414	3.29573	3.33785	protein FAM214B	FAM214B
GHT09_002062	-1.51897	7.26331	277.031	6.99099e-62	1.47262e-60	7.9414	7.73569	6.18381	6.44413	stomatin protein 2 mitochondrial	STOML2
GHT09_002063	-1.24906	4.90582	102.111	5.59987e-24	4.57219e-23	5.41102	5.44679	4.14794	4.21927	GPI ethanolamine phosphate transferase 3	PIGO
GHT09_002066	-1.50954	1.65413	24.3421	8.09699e-07	2.84314e-06	2.25764	2.29949	1.13857	0.614642	dnaJ subfamily B member 5	0
GHT09_002072	-8.86668	1.2779	129.165	6.91568e-30	6.8852e-29	2.51177	2.29949	-2.5025	-2.5025	hypothetical protein	0
GHT09_002073	1.3573	1.82678	19.7401	8.89527e-06	2.86508e-05	0.859193	1.09554	2.37605	2.16949	non-histone chromosomal protein HMG-17	HMGN2
GHT09_002077	-2.1137	3.6109	143.797	4.4693e-33	4.85903e-32	4.1769	4.56064	2.37605	2.24995	chymotrypsin elastase family member 3B-like	CELA3B
GHT09_002079	1.56334	9.62703	209.185	3.26131e-18	2.1198e-17	8.28742	8.9253	10.27	10.1358	basement membrane-specific heparan sulfate proteoglycan core protein	HSPG2
GHT09_002082	2.35652	8.0935	684.577	1.14028e-149	7.73697e-148	6.51038	6.43357	8.72894	8.91694	rap1 GTPase-activating protein 1	RAP1GAP
GHT09_002083	-2.70947	-0.743271	9.03854	0.00264506	0.00665358	0.262963	-0.329951	-1.43697	-2.05301	alkaline phosphatase tissue-nonspecific isozyme	ALPL
GHT09_002084	2.34704	6.39868	465.661	1.04869e-102	4.19455e-101	4.75989	4.78779	7.07055	7.15402	hypothetical protein	0
GHT09_002099	1.32688	1.91919	20.161	7.1382e-06	2.32059e-05	0.68646	1.40754	2.37605	2.32617	protein FAM43B	FAM43B
GHT09_002105	8.29853	1.09305	78.7105	7.4742e-19	4.97449e-18	-2.5025	-2.5025	1.74797	1.94618	UBX domain-containing protein 10	UBXN10
GHT09_002107	4.17408	-0.261344	18.1118	2.08771e-05	6.53291e-05	-2.5025	-1.83829	0.190081	0.487649	hypothetical protein	0
GHT09_002109	-3.39548	1.14523	62.8125	2.33037e-15	1.33417e-14	1.82941	2.35874	-1.10229	-0.671073	hypothetical protein	0
GHT09_002118	-2.16381	1.39688	38.7904	4.7639e-10	2.08785e-09	1.94896	2.38747	0.190081	0.194237	hypothetical protein	0
GHT09_002121	-4.84855	3.8779	498.489	9.12643e-110	3.98366e-108	4.8394	5.01655	0.0626637	0.419699	aflatoxin B1 aldehyde reductase member 3	AKR7A3
GHT09_002136	-5.57246	-1.32976	10.1852	0.00141679	0.00367323	-0.539088	-0.530361	-2.5025	-2.5025	hypothetical protein	0
GHT09_002137	-5.41289	4.50304	753.941	1.71084e-164	1.35282e-162	5.48212	5.62023	0.781941	-0.0731063	hypothetical protein	0
GHT09_002145	-1.44622	2.78589	45.2954	1.71668e-11	8.17919e-11	3.29235	3.48761	2.23541	1.76637	rootletin	CROCC
GHT09_002146	-1.97378	0.311615	15.0022	0.000107553	0.000315028	0.859193	1.16357	-0.83081	-0.530011	hypothetical protein	0
GHT09_002152	1.24238	3.24189	41.3301	1.29977e-10	5.90673e-10	2.56265	2.32942	3.41792	3.84485	REM2- and Rab small GTPase 1-like	CPLANE2
GHT09_002154	2.76807	0.133913	17.0269	3.69257e-05	0.000112802	-1.39151	-1.38521	0.610295	0.786352	hypothetical protein	0
GHT09_002155	1.66274	8.17722	367.171	1.75358e-81	5.12829e-80	7.01957	7.20073	8.71511	8.83045	hypothetical protein	0
GHT09_002157	-6.14714	-0.974758	16.2453	5.57489e-05	0.000167663	0.134344	-0.329951	-2.5025	-2.5025	chloride channel protein ClC-Kb	CLCNKB
GHT09_002160	-3.67115	0.925192	58.1021	2.54192e-14	1.39061e-13	1.94896	1.88153	-0.602418	-1.7108	SH3 domain-binding glutamic acid-rich protein 2-like	SH3BGRL2
GHT09_002168	-6.98651	-0.365726	32.0715	1.49593e-08	5.94755e-08	0.262963	0.949025	-2.5025	-2.5025	hypothetical protein	0
GHT09_002172	1.26839	7.9898	215.369	1.37598e-48	2.2523e-47	7.06328	7.35327	8.49755	8.46845	unconventional myosin-XVIIIa	MYO18A
GHT09_002173	-1.06669	5.63576	92.5188	7.03231e-22	5.29975e-21	6.05078	6.12992	5.0638	4.99618	peroxisomal sarcosine oxidase	PIPOX
GHT09_002184	1.49119	4.58264	117.847	2.04049e-27	1.88456e-26	3.71968	3.51391	5.11688	5.08386	protein PROCA1	PROCA1
GHT09_002189	1.1153	6.51569	124.769	6.29219e-29	6.08186e-28	5.87072	5.81261	6.98527	6.92581	sperm-associated antigen 5	SPAG5
GHT09_002190	3.03468	-1.04635	5.70491	0.016922	0.0380509	-1.84261	-2.5025	-0.83081	-0.401522	fructose-bisphosphate aldolase C	ALDOC
GHT09_002192	-1.25783	4.96056	105.558	9.8754e-25	8.2599e-24	5.43511	5.53612	4.10007	4.33907	protein unc-119 A	0
GHT09_002194	-6.5575	-0.68955	22.6704	1.92965e-06	6.57249e-06	-0.16343	0.602018	-2.5025	-2.5025	solute carrier family 13 member 2	SLC13A2
GHT09_002209	-12.1091	4.52383	970.652	1.22458e-210	1.42238e-208	5.54672	5.67371	-2.5025	-2.5025	hypothetical protein	0
GHT09_002210	-15.5009	7.98547	3624.21	0	0	9.01353	8.9841	-2.5025	-2.5025	hypothetical protein	0
GHT09_002211	-2.10148	0.67679	22.0358	2.68473e-06	9.04249e-06	1.27983	1.56676	-0.602418	-0.283546	hypothetical protein	0
GHT09_002214	-1.04678	5.52655	86.8218	1.24444e-20	8.93003e-20	5.93729	6.01262	5.04706	4.82616	kelch protein 11-like	KLHL11
GHT09_002218	8.3026	5.9243	1416.56	9.52988e-303	2.06237e-300	-1.84261	-0.329951	6.95307	6.7928	hypothetical protein	0
GHT09_002219	11.8071	4.40981	734.28	2.70667e-160	2.02351e-158	-2.5025	-2.5025	5.24714	5.36474	hypothetical protein	0
GHT09_002220	10.7616	3.4072	395.139	1.62542e-87	5.27081e-86	-2.5025	-2.5025	4.24652	4.29234	hypothetical protein	0
GHT09_002223	5.53504	-1.11374	9.15795	0.00247793	0.00625536	-2.5025	-2.5025	-0.83081	-0.401522	hypothetical protein	0
GHT09_002224	7.44333	0.322682	42.9737	5.61364e-11	2.60698e-10	-2.5025	-2.5025	1.25972	0.890429	glypican-2	GPC2
GHT09_002231	-2.2478	2.2232	70.5247	4.68878e-17	2.90877e-16	3.11624	2.9465	1.31668	0.487649	ankyrin repeat and BTB/POZ domain-containing protein 2-like	ABTB2
GHT09_002232	-2.0922	3.25283	116.289	4.46632e-27	4.06476e-26	3.77466	4.23668	2.1121	1.87185	ankyrin repeat and BTB/POZ domain-containing protein 2	ABTB2
GHT09_002233	-2.00631	1.3319	32.7152	1.07436e-08	4.30728e-08	1.98671	2.17317	0.0626637	0.348389	hypothetical protein	0
GHT09_002235	6.96207	-0.0814575	29.274	6.31835e-08	2.40509e-07	-2.5025	-2.5025	0.860668	0.419699	rhombotin-2	LMO2
GHT09_002241	-7.6744	5.29366	1268.83	9.96814e-274	1.81358e-271	6.31094	6.38631	-0.405289	-1.20254	hypothetical protein	0
GHT09_002247	1.04389	8.62472	154.835	2.15557e-35	2.52514e-34	8.17032	7.82374	8.99472	9.10412	importin subunit alpha-1	KPNA1
GHT09_002248	2.12764	0.87934	21.2095	4.12946e-06	1.37042e-05	-1.04838	0.00277842	1.37148	1.46303	UPF0450 protein C17orf58-like	C17ORF58
GHT09_002253	-12.848	7.50003	3149.36	0	0	8.41013	8.61873	-1.87352	-2.5025	acyl-CoA desaturase 1	SCD1
GHT09_002256	-12.4122	4.83595	790.333	4.63108e-29	4.4953e-28	5.53084	6.21654	-2.5025	-2.5025	acyl-CoA desaturase 1-like	SCD1
GHT09_002265	-1.35694	3.78145	71.1172	3.47418e-17	2.16704e-16	4.26401	4.43552	3.04912	2.98507	hypothetical protein	0
GHT09_002266	-8.45377	6.76084	2281.67	0	0	7.9092	7.65009	-0.602418	-0.174493	canalicular multispecific organic anion transporter 1	ABCC2
GHT09_002267	2.08751	2.08811	48.3392	3.63852e-12	1.79344e-11	0.490195	0.869781	2.55242	2.74243	copper homeostasis protein cutC-like	CUTC
GHT09_002269	1.1578	4.26348	63.9113	1.33521e-15	7.75879e-15	3.47607	3.60236	4.56135	4.78624	aspartate aminotransferase cytoplasmic	GOT1
GHT09_002272	1.68847	0.164286	8.42464	0.00370367	0.0091453	-0.339066	-1.38521	0.516152	0.674178	hypothetical protein	0
GHT09_002281	-3.27912	0.597871	40.2293	2.28177e-10	1.01916e-09	1.08479	1.88153	-1.10229	-1.20254	hypothetical protein	0
GHT09_002285	-1.31165	3.70816	64.2198	1.14195e-15	6.65272e-15	4.22507	4.30605	2.79223	3.09808	hypothetical protein	0
GHT09_002287	1.001	5.92623	85.1319	2.91967e-20	2.06699e-19	5.36519	5.28822	6.38198	6.27055	zinc finger CCHC domain-containing protein 2	ZCCHC2
GHT09_002290	1.20851	5.45348	108.415	2.47013e-25	2.1107e-24	4.91965	4.45601	5.96741	5.85581	lisH domain and HEAT repeat-containing protein KIAA1468	0
GHT09_002295	-1.69136	2.38186	47.8685	4.62432e-12	2.26522e-11	2.99183	3.12773	1.57197	1.32125	small nuclear ribonucleoprotein Sm D3	SNRPD3
GHT09_002305	-2.21232	2.47106	80.5558	2.94256e-19	1.99459e-18	3.29235	3.25792	1.0063	1.24477	thrombospondin type-1 domain-containing protein 1	THSD1
GHT09_002307	1.70029	6.14889	244.525	5.84178e-55	1.07908e-53	5.11976	4.96506	6.87225	6.60287	hypothetical protein	0
GHT09_002313	1.01675	1.92646	12.4959	0.000408297	0.00112704	1.15278	1.46259	2.50419	2.08427	hypothetical protein	0
GHT09_002316	8.39177	1.18729	84.3376	4.42549e-20	3.10101e-19	-2.5025	-2.5025	1.57197	2.19003	hypothetical protein	0
GHT09_002317	-3.1305	3.26363	218.279	2.87244e-49	4.78949e-48	4.1769	4.23668	0.93532	1.32125	methylated-DNA--protein-cysteine methyltransferase	MGMT
GHT09_002324	2.05798	5.60949	295.043	6.73237e-66	1.52435e-64	4.36778	4.04258	6.22531	6.29683	receptor-type tyrosine-protein phosphatase epsilon	PTPRE
GHT09_002325	-6.62721	-0.638647	23.9889	9.72576e-07	3.39132e-06	-0.16343	0.696902	-2.5025	-2.5025	clarin-3	CLRN3
GHT09_002330	-2.4054	1.57112	51.8465	6.10397e-13	3.13572e-12	2.45904	2.35874	-0.231886	0.419699	hypothetical protein	0
GHT09_002331	-1.80888	-0.411111	6.59388	0.0102365	0.0237879	0.134344	0.272969	-1.10229	-1.20254	hypothetical protein	0
GHT09_002332	3.69527	3.36214	232.073	2.92458e-52	5.16106e-51	0.68646	0.500452	4.17129	4.11033	hypothetical protein	0
GHT09_002333	2.26503	-0.548971	6.69633	0.00966458	0.0225456	-1.84261	-1.38521	0.415434	-0.530011	hypothetical protein	0
GHT09_002334	2.08028	-0.114509	9.02285	0.00266785	0.00669127	-1.84261	-0.763173	0.415434	0.348389	hypothetical protein	0
GHT09_002342	-5.70716	-1.25149	11.361	0.000750729	0.0020115	-0.339066	-0.530361	-2.5025	-2.5025	zinc finger protein DZIP1	DZIP1
GHT09_002343	5.32903	-1.25378	7.6712	0.00561595	0.0135102	-2.5025	-2.5025	0.0626637	-1.7108	claudin-10	CLDN10
GHT09_002345	3.49011	-0.0839136	18.1251	2.07318e-05	6.49336e-05	-1.84261	-1.83829	0.307153	0.674178	transcription factor SOX-21	SOX21
GHT09_002346	1.33284	4.52323	93.5444	4.19324e-22	3.18466e-21	3.71968	3.63867	5.14074	4.86819	integral membrane protein GPR180	GPR180
GHT09_002384	1.08803	4.64953	67.9308	1.74295e-16	1.05238e-15	4.00363	3.9589	5.17195	4.95776	WW domain-binding protein 4	WBP4
GHT09_002391	-1.13303	7.187	155.191	1.47484e-35	1.7406e-34	7.67134	7.63444	6.5562	6.48833	hypothetical protein	0
GHT09_002395	-1.08481	2.58239	23.509	1.24781e-06	4.31228e-06	3.21496	2.90735	2.04626	1.99369	hypothetical protein	0
GHT09_002396	-1.52169	4.02027	100.501	1.25947e-23	1.01384e-22	4.62876	4.64636	3.08235	3.17222	zinc finger protein 398	ZNF398
GHT09_002414	1.56368	-0.0795649	5.89877	0.0151557	0.0344637	-0.771375	-1.04092	0.415434	0.273371	hypothetical protein	0
GHT09_002416	1.95918	2.60498	61.0279	5.76003e-15	3.24084e-14	1.3966	1.16357	3.03221	3.27194	ataxin-7 protein 1-like	ATXN7L1
GHT09_002425	2.55956	8.37146	813.21	3.87129e-177	3.40127e-175	6.48423	6.66975	9.10064	9.17265	CD44 antigen	CD44
GHT09_002427	2.03475	2.56829	63.3722	1.75472e-15	1.01449e-14	1.45162	0.869781	2.99779	3.25254	hypothetical protein	0
GHT09_002429	1.00646	7.76524	134.06	5.92072e-31	6.07405e-30	7.21609	7.1249	8.22508	8.12839	tripartite motif-containing protein 44	TRIM44
GHT09_002430	-1.88918	2.26678	54.159	1.88354e-13	9.90124e-13	3.11624	2.86711	1.42428	0.987501	low-density lipoprotein receptor class A domain-containing protein 3	LDLRAD3
GHT09_002433	2.15775	-0.601155	5.86851	0.0154184	0.0349759	-1.39151	-1.83829	-0.83081	0.194237	proline-rich protein 5-like	PRR5L
GHT09_002459	-4.27604	-0.0681535	30.8026	2.87406e-08	1.12206e-07	0.938376	0.869781	-2.5025	-1.7108	hypothetical protein	0
GHT09_002463	2.54551	2.80344	102.142	5.51158e-24	4.50189e-23	0.77541	1.22854	3.50627	3.42708	sushi domain-containing protein 1	SUSD1
GHT09_002467	-1.00842	4.63108	61.3007	5.01596e-15	2.82994e-14	5.05016	5.10139	4.05055	4.09407	hypothetical protein	0
GHT09_002470	5.97133	2.08007	143.085	6.3865e-33	6.91053e-32	-1.84261	-1.83829	2.59909	3.05393	thymic stromal cotransporter-like	SLC46A2
GHT09_002476	1.31177	4.32535	82.7896	9.52447e-20	6.56432e-19	3.67414	3.28871	4.8633	4.73124	WD repeat-containing protein 31	WDR31
GHT09_002477	-5.32308	2.77063	278.048	3.2039e-62	6.79061e-61	3.89864	3.82876	-0.602418	-1.20254	B box and SPRY domain-containing protein	BSPRY
GHT09_002482	1.91355	7.12048	401.212	1.41314e-88	4.65588e-87	6.0238	5.66493	7.72495	7.80503	regulator of G-protein signaling 3	RGS3
GHT09_002483	2.23501	3.69921	145.123	2.29753e-33	2.52054e-32	2.05936	2.23771	4.4764	4.21927	hypothetical protein	0
GHT09_002484	2.28943	6.18957	416.697	3.6636e-92	1.27878e-90	4.45115	4.75509	6.85553	6.92658	hypothetical protein	0
GHT09_002485	-4.39615	0.0306528	34.5194	4.25269e-09	1.75353e-08	0.591662	1.3503	-1.87352	-2.05301	protein AMBP	AMBP
GHT09_002486	-1.74039	9.33632	423.239	2.52683e-93	8.98774e-92	9.87892	10.0392	8.34289	8.0927	hypothetical protein	0
GHT09_002488	2.65903	4.56975	303.05	1.24789e-67	2.90219e-66	2.70531	2.62317	5.35645	5.23236	hypothetical protein	0
GHT09_002498	1.70978	1.11958	18.0215	2.1921e-05	6.84187e-05	0.68646	-1.04092	1.78881	1.46303	ribonucleoside-diphosphate reductase subunit M2	RRM2
GHT09_002500	-7.13682	-0.246348	36.2007	1.79511e-09	7.57817e-09	1.01344	0.500452	-2.5025	-2.5025	fez family zinc finger protein 1	FEZF1
GHT09_002501	-2.51789	2.96487	132.768	1.13282e-30	1.15295e-29	3.63901	3.98734	1.31668	1.42887	hypothetical protein	0
GHT09_002502	-2.09658	0.755054	23.2198	1.45018e-06	4.97816e-06	1.55574	1.46259	-0.602418	-0.174493	hypothetical protein	0
GHT09_002511	-5.94381	-1.10655	13.7698	0.000206902	0.000589726	-0.00687362	-0.530361	-2.5025	-2.5025	transmembrane protein 229A	TMEM229A
GHT09_002512	5.30861	-1.25649	7.5867	0.00588264	0.0141171	-2.5025	-2.5025	-0.602418	-0.827436	prosaposin receptor GPR37	GPR37
GHT09_002526	-3.62069	3.39131	281.244	6.51581e-63	1.39978e-61	4.43758	4.32102	1.13857	0.674178	fibrinogen protein 1-like	FGL1
GHT09_002532	-9.14138	1.539	155.334	1.37254e-35	1.62173e-34	2.63574	2.71672	-2.5025	-2.5025	xylosyltransferase 1	XYLT1
GHT09_002538	3.64668	2.95992	177.384	2.18975e-40	2.94435e-39	-0.16343	0.602018	3.73246	3.70912	synaptotagmin-17	SYT17
GHT09_002541	-2.13796	3.2746	122.075	2.43722e-28	2.31014e-27	4.06667	4.04258	2.1121	1.84619	transmembrane channel protein 7-like	TMC7
GHT09_002543	-5.2581	-1.50025	7.89657	0.00495521	0.0119978	-0.771375	-0.763173	-2.5025	-2.5025	hypothetical protein	0
GHT09_002544	-7.65108	2.20753	233.157	1.70235e-52	3.01972e-51	3.30735	3.37733	-2.5025	-2.05301	transmembrane channel protein 5-like	TMC5
GHT09_002546	1.17398	4.39797	69.845	6.61357e-17	4.07213e-16	3.77466	3.55248	4.97811	4.69217	centriolar coiled-coil protein of 110 kDa	CCP110
GHT09_002554	-13.0064	5.44771	1455.25	6.13270616268957e-313	1.48332124704392e-310	6.49245	6.52046	-2.5025	-2.5025	uromodulin	UMOD
GHT09_002556	-8.49068	0.927036	98.9427	2.76155e-23	2.19122e-22	2.05936	2.03471	-2.5025	-2.5025	hypothetical protein	0
GHT09_002558	-9.12998	1.52769	154.119	3.04635e-35	3.54642e-34	2.22643	3.0033	-2.5025	-2.5025	acyl-coenzyme A synthetase ACSM2B mitochondrial	ACSM2B
GHT09_002560	-1.03605	8.91107	154.693	1.89316e-35	2.22409e-34	9.39667	9.2821	8.28919	8.31997	C-1-tetrahydrofolate synthase cytoplasmic	MTHFD1
GHT09_002561	-2.31004	5.61774	381.435	1.46643e-84	4.50646e-83	6.31651	6.45409	4.24652	3.94493	zinc finger and BTB domain-containing protein 25	ZBTB25
GHT09_002562	-1.87111	6.29809	316.084	1.89693e-70	4.59351e-69	6.95677	6.98267	5.22127	4.99326	zinc finger and BTB domain-containing protein 1	ZBTB1
GHT09_002564	7.46127	2.64817	227.896	2.35544e-51	4.09691e-50	-1.84261	-2.5025	3.49398	3.46971	spectrin beta chain erythrocytic	SPTB
GHT09_002567	1.82155	3.15658	76.4864	2.29962e-18	1.5028e-17	1.60511	2.2058	3.63504	3.77178	hypothetical protein	0
GHT09_002568	-2.8132	5.98315	576.482	1.62809e-126	8.51703e-125	6.70409	6.9348	4.10816	3.95096	hypothetical protein	0
GHT09_002569	-1.0918	4.64702	71.9884	2.23577e-17	1.40351e-16	5.15334	5.08832	3.96405	4.09407	hypothetical protein	0
GHT09_002570	-1.41151	6.23789	184.488	6.25251e-42	8.68549e-41	6.79066	6.79969	5.31512	5.44811	hypothetical protein	0
GHT09_002581	4.6771	2.65513	182.426	3.00436e-41	4.10137e-40	-2.5025	0.00277842	3.56623	3.35615	ras protein family member 11A-like	RASL11A
GHT09_002584	4.57043	0.0451176	26.1414	3.18736e-07	1.15429e-06	-2.5025	-1.83829	0.781941	0.674178	cortactin-binding protein 2	CTTNBP2
GHT09_002586	2.23162	2.77958	83.0876	8.4193e-20	5.82215e-19	1.60511	0.785929	3.64619	3.17222	hypothetical protein	0
GHT09_002589	-1.204	3.93403	61.7033	4.08959e-15	2.31799e-14	4.52355	4.37941	3.33762	3.20286	hypothetical protein	0
GHT09_002591	-4.23777	-0.74307	15.6645	7.57571e-05	0.000225299	-0.00687362	0.272969	-2.5025	-2.05301	laminin subunit alpha-2	LAMA2
GHT09_002595	-1.83339	0.11785	11.1448	0.000843446	0.00225054	0.68646	0.869781	-0.83081	-0.671073	hypothetical protein	0
GHT09_002605	-1.14983	9.42522	191.502	1.87089e-43	2.68039e-42	9.79448	9.98017	8.82625	8.65178	L-lactate dehydrogenase A chain	LDHA
GHT09_002608	-2.37892	2.66597	101.172	8.98646e-24	7.27659e-23	3.71968	3.24228	1.37148	1.07845	serum amyloid A-3 protein-like	SAA3
GHT09_002625	7.22282	0.134881	36.2458	1.75402e-09	7.41537e-09	-2.5025	-2.5025	1.07395	0.674178	hypothetical protein	0
GHT09_002626	1.58792	1.59517	22.2848	2.35837e-06	7.97595e-06	0.490195	0.696902	2.17507	1.99369	hypothetical protein	0
GHT09_002627	-4.36707	5.06934	793.212	7.11993e-173	5.97464e-171	5.93488	6.1821	1.97727	1.59211	APOBEC1 complementation factor	A1CF
GHT09_002639	-1.43306	0.337126	8.60541	0.00335352	0.00832166	0.262963	1.3503	-0.0771072	-0.530011	hypothetical protein	0
GHT09_002640	6.28036	5.9328	1269.46	7.34061e-274	1.34746e-271	0.262963	1.09554	6.93954	6.79782	A-kinase anchor protein SPHKAP	SPHKAP
GHT09_002642	-6.75355	1.34375	125.552	4.24617e-29	4.12947e-28	2.22643	2.6707	-2.5025	-2.05301	hypothetical protein	0
GHT09_002658	4.85338	-1.50502	5.23912	0.0220895	0.0488215	-2.5025	-2.5025	-1.43697	-0.827436	sodium-dependent glucose transporter 1B-like	MFSD4B2
GHT09_002663	1.82442	4.61147	169.932	9.14231e-39	1.17989e-37	3.47607	3.30387	5.1758	5.22242	tyrosine-protein kinase Fyn	FYN
GHT09_002664	1.78867	2.15888	39.6235	3.11054e-10	1.37645e-09	1.2177	0.696902	2.47946	2.82355	hypothetical protein	0
GHT09_002672	1.46906	5.56374	155.883	1.66363e-32	1.78417e-31	4.18504	4.96982	6.23458	5.94764	sodium- and chloride-dependent betaine transporter	SLC6A12
GHT09_002675	1.21977	7.06864	171.411	4.3583e-39	5.68542e-38	6.3239	6.32635	7.6164	7.46917	lysine-specific demethylase 5A	KDM5A
GHT09_002680	3.95124	2.53596	146.691	1.04639e-33	1.1591e-32	-0.16343	-0.530361	3.41792	3.20286	hypothetical protein	0
GHT09_002685	1.37191	4.03265	77.1505	1.64394e-18	1.08049e-17	3.36581	2.90735	4.53758	4.48751	hypothetical protein	0
GHT09_002686	1.11743	4.43552	65.0043	7.67365e-16	4.49338e-15	3.73085	3.75349	4.70162	4.96672	hypothetical protein	0
GHT09_002687	-2.23685	0.595333	22.9394	1.67773e-06	5.73441e-06	1.55574	1.16357	-0.405289	-0.671073	interferon-inducible GTPase 1-like	IIGP1
GHT09_002695	1.10374	7.32017	149.813	2.18623e-34	2.48462e-33	6.55973	6.75077	7.73085	7.78912	bifunctional heparan sulfate N-deacetylase/N-sulfotransferase 1	NDST1
GHT09_002700	7.09718	7.68086	2588.33	0	0	1.87037	1.3503	8.66697	8.63993	hypothetical protein	0
GHT09_002701	-2.06785	0.65694	21.1102	4.34906e-06	1.43912e-05	1.55574	1.22854	-0.405289	-0.401522	hypothetical protein	0
GHT09_002707	1.11517	3.6725	43.0426	5.4194e-11	2.51962e-10	3.1828	2.73919	4.1162	4.04417	zinc finger BED domain-containing protein 3	ZBED3
GHT09_002711	-1.3261	1.23298	14.4718	0.000142478	0.000412856	1.82941	1.75494	0.190081	0.786352	small EDRK-rich factor 1	SERF1
GHT09_002717	2.06988	2.37115	57.6112	3.26138e-14	1.77383e-13	1.08479	0.869781	3.06583	2.86246	hypothetical protein	0
GHT09_002720	2.50648	4.82932	311.072	2.29886e-69	5.47017e-68	3.04647	3.05795	5.41306	5.63576	sulfotransferase 1A1	SULT1A1
GHT09_002723	3.2042	2.81733	139.275	4.32166e-32	4.56338e-31	0.77541	0.14419	3.50627	3.56715	coronin-1A	CORO1A
GHT09_002725	1.09952	7.80692	160.043	1.29578e-36	1.57446e-35	7.11213	7.18649	8.21153	8.28339	mitogen-activated protein kinase 3	MAPK3
GHT09_002731	2.78907	-0.598565	8.42615	0.0037006	0.00913957	-1.84261	-1.83829	0.0626637	-0.174493	protein FAM57B	TLCD3B
GHT09_002733	-2.31134	-0.977049	5.49261	0.0191017	0.0426352	-0.00687362	-0.763173	-2.5025	-1.4344	hypothetical protein	0
GHT09_002735	1.90344	3.90257	126.507	2.62883e-29	2.57485e-28	2.53743	2.6939	4.50732	4.47919	hypothetical protein	0
GHT09_002738	-1.9307	3.46429	113.744	1.60577e-26	1.43723e-25	4.16871	4.2208	2.50419	2.12751	aspartate beta-hydroxylase domain-containing protein 1	ASPHD1
GHT09_002739	-1.9408	7.47932	454.861	2.21324e-100	8.70021e-99	8.11654	8.19581	6.10515	6.31448	seizure 6 protein 2-like	SEZ6L2
GHT09_002741	-1.44598	5.76977	170.882	7.07529e-39	9.15425e-38	6.52808	6.12779	4.78976	4.99033	hypothetical protein	0
GHT09_002743	2.62337	1.84004	56.9542	4.55263e-14	2.45792e-13	-0.00687362	0.14419	2.70956	2.28856	hypothetical protein	0
GHT09_002747	-4.12156	0.872139	63.5466	1.60631e-15	9.29732e-15	1.98671	1.79838	-1.43697	-1.4344	transmembrane protein C16orf54-like	C16ORF54
GHT09_002748	-2.13989	5.32891	311.385	1.96783e-69	4.6879e-68	6.09681	6.04904	3.85289	4.01569	nicotinate-nucleotide pyrophosphorylase carboxylating	QPRT
GHT09_002751	-2.03083	2.60046	75.2561	4.28316e-18	2.77347e-17	3.38006	3.34839	1.31668	1.46303	sesquipedalian-1-like	PHETA1
GHT09_002753	-1.2131	4.51252	83.1788	7.825e-20	5.41846e-19	5.10267	4.95069	3.78387	3.85775	zinc finger protein 48	ZNF48
GHT09_002762	7.0912	0.0417713	32.7247	1.06913e-08	4.28967e-08	-2.5025	-2.5025	0.415434	0.939781	hypothetical protein	0
GHT09_002763	-3.95977	0.464568	45.199	1.80318e-11	8.57938e-11	1.3394	1.56676	-1.43697	-1.7108	hypothetical protein	0
GHT09_002791	1.27067	7.44807	201.08	1.55474e-45	2.35722e-44	6.78397	6.54617	7.93793	7.94076	hypothetical protein	0
GHT09_002794	2.1767	2.64594	73.7968	8.9577e-18	5.71752e-17	1.08479	1.22854	3.20812	3.28154	integrin alpha-X	ITGAX
GHT09_002803	-2.21492	2.78291	95.8832	1.29008e-22	9.98977e-22	3.5282	3.63867	1.78881	1.12186	hypothetical protein	0
GHT09_002805	-1.02155	5.17122	75.5234	3.74167e-18	2.42665e-17	5.69375	5.53291	4.5195	4.66308	28S ribosomal protein S17 mitochondrial	MRPS17
GHT09_002819	-4.85534	-1.69347	5.70721	0.0168999	0.0380145	-0.539088	-1.83829	-2.5025	-2.5025	hypothetical protein	0
GHT09_002832	-3.18986	1.09935	56.1049	7.00791e-14	3.74807e-13	1.98671	2.1056	-1.10229	-0.530011	hypothetical protein	0
GHT09_002838	-2.2404	4.15359	212.796	4.44782e-48	7.19739e-47	4.89505	4.984	2.70956	2.74243	C-X-C motif chemokine 10	CXCL10
GHT09_002843	1.24423	2.29236	23.1023	1.54148e-06	5.281e-06	1.3966	1.61616	2.59909	2.78356	protein FAM47E	FAM47E
GHT09_002844	1.91206	6.17579	304.516	6.01546e-68	1.40696e-66	4.8394	4.96506	6.69292	6.91197	starch-binding domain-containing protein 1	STBD1
GHT09_002845	1.13934	3.60532	43.2457	4.88564e-11	2.27609e-10	2.99183	2.7831	3.90954	4.09407	hypothetical protein	0
GHT09_002846	1.68432	7.17519	322.351	8.38356e-72	2.0791e-70	6.05966	6.11925	7.75553	7.78702	protein Shroom3	SHROOM3
GHT09_002847	-6.96952	2.35931	249.761	4.28387e-56	8.16238e-55	3.61511	3.34839	-2.5025	-1.7108	ankyrin repeat domain-containing protein SOWAHB	SOWAHB
GHT09_002848	-8.54052	3.09728	415.974	5.24471e-92	1.81831e-90	4.0128	4.40774	-1.87352	-2.5025	hypothetical protein	0
GHT09_002854	-6.30795	3.57927	499.5	5.53274e-110	2.42016e-108	4.61074	4.73846	-0.83081	-1.20254	hypothetical protein	0
GHT09_002857	1.99283	0.218793	11.5431	0.00068066	0.00183476	-0.539088	-1.38521	0.610295	0.786352	hypothetical protein	0
GHT09_002858	-1.92407	9.84345	514.411	6.09109e-113	2.79524e-111	10.4144	10.5961	8.67924	8.48543	integrin alpha-V	ITGAV
GHT09_002863	-2.76531	0.0289352	19.8456	8.41749e-06	2.71758e-05	0.938376	0.785929	-1.10229	-1.4344	leukemia NUP98 fusion partner 1	LNP1
GHT09_002871	-1.42906	2.67305	41.744	1.05199e-10	4.80299e-10	3.16645	3.37733	1.94149	1.84619	collagen alpha-1(VIII) chain	COL8A1
GHT09_002872	-2.82783	-1.03999	6.9235	0.00851019	0.0200643	-0.539088	-0.154015	-1.87352	-2.05301	hypothetical protein	0
GHT09_002887	1.75258	8.5999	416.53	3.98083e-92	1.38715e-90	7.41521	7.51907	9.17714	9.2604	adiponectin receptor protein 2	ADIPOR2
GHT09_002888	-3.46184	-0.247917	20.7012	5.3836e-06	1.76807e-05	0.77541	0.500452	-1.87352	-1.7108	hypothetical protein	0
GHT09_002889	1.12276	6.56734	128.352	1.04043e-29	1.03036e-28	6.03285	5.72808	7.01247	7.0062	F-box/LRR-repeat protein 14	FBXL14
GHT09_002890	1.86022	6.83873	354.801	8.20291e-79	2.31019e-77	5.62958	5.59889	7.47733	7.46496	hypothetical protein	0
GHT09_002894	-2.08163	-0.249574	9.81811	0.00172924	0.00443782	0.490195	0.391189	-1.10229	-1.20254	V-set and transmembrane domain-containing protein 2B	VSTM2B
GHT09_002903	1.24028	5.56387	117.236	2.7744e-27	2.54177e-26	4.79754	4.79317	6.07451	5.98926	teashirt 3	TSHZ3
GHT09_002904	-1.48	5.83714	180.906	3.7559e-41	5.12053e-40	6.41842	6.41625	4.95587	4.93055	hypothetical protein	0
GHT09_002906	-1.03285	5.63974	87.2045	1.02593e-20	7.38519e-20	6.14768	6.01722	4.92872	5.15611	selenide water dikinase 1	SEPHS1
GHT09_002907	-1.21588	1.74813	17.2682	3.25231e-05	9.97528e-05	1.94896	2.5488	1.07395	1.16401	BEN domain-containing protein 7	BEND7
GHT09_002916	4.89957	1.08373	63.3524	1.77246e-15	1.02417e-14	-2.5025	-1.38521	1.97727	1.71059	hypothetical protein	0
GHT09_002917	3.72037	2.54451	138.657	5.89157e-32	6.18299e-31	0.262963	-0.763173	3.20812	3.35615	hypothetical protein	0
GHT09_002920	-3.15337	6.23216	745.847	9.15711e-163	7.07748e-161	7.15212	7.06613	3.91877	4.00992	tissue-type plasminogen activator	PLAT
GHT09_002921	-1.23364	5.75762	125.832	3.68895e-29	3.59437e-28	6.16836	6.35755	5.07209	5.0049	inhibitor of nuclear factor kappa-B kinase subunit beta	IKBKB
GHT09_002925	-2.58151	4.36647	297.231	2.26337e-66	5.15882e-65	5.23009	5.18969	2.45429	2.79701	sodium-dependent phosphate transporter 2	SLC20A2
GHT09_002926	-2.8931	1.72017	75.3017	4.18556e-18	2.71112e-17	2.70531	2.57402	-0.602418	0.273371	hypothetical protein	0
GHT09_002934	7.21918	0.134231	36.1747	1.81919e-09	7.67667e-09	-2.5025	-2.5025	1.0063	0.731355	hypothetical protein	0
GHT09_002940	2.50084	6.37662	513.113	6.56303e-113	3.00511e-111	4.49764	4.73846	7.17437	7.05741	peptidyl-prolyl cis-trans isomerase FKBP9	FKBP9
GHT09_002944	-3.18323	3.31417	229.497	1.05864e-51	1.85388e-50	4.11006	4.40071	1.07395	1.24477	hypothetical protein	0
GHT09_002945	4.94784	0.367775	36.6307	1.44e-09	6.11166e-09	-2.5025	-1.83829	0.781941	1.24477	hypothetical protein	0
GHT09_002947	-1.53861	3.26392	67.9273	1.74601e-16	1.05391e-15	3.79608	3.98734	2.52851	2.26939	pyroglutamyl-peptidase 1	PGPEP1
GHT09_002949	-1.09982	7.05504	142.291	9.51237e-33	1.02497e-31	7.48692	7.53521	6.39527	6.42908	single-stranded DNA-binding protein 4	SSBP4
GHT09_002950	-6.75432	6.78857	2075.81	0	0	7.7855	7.81979	1.42428	0.939781	inositol-3-phosphate synthase 1	ISYNA1
GHT09_002955	-3.90513	0.416072	42.9987	5.54246e-11	2.57508e-10	1.45162	1.3503	-1.87352	-1.4344	cytokine receptor factor 1-like	CRLF1
GHT09_002956	3.19704	2.97889	154.517	2.0679e-35	2.42383e-34	0.381049	0.869781	3.48158	3.85775	transmembrane protein 59-like	TMEM59L
GHT09_002963	1.02951	1.03439	6.91837	0.00853466	0.0201151	0.262963	0.602018	1.66265	1.12186	ceramide synthase 1	CERS1
GHT09_002970	2.4403	0.351692	17.4468	2.96062e-05	9.11599e-05	-1.39151	-0.763173	1.25972	0.614642	myocyte-specific enhancer factor 2B	MEF2B
GHT09_002976	-4.2922	4.9113	735.93	1.20204e-160	9.05228e-159	5.88078	5.93445	1.5244	1.79347	transmembrane 6 superfamily member 2	TM6SF2
GHT09_002991	-1.37523	4.19975	91.3214	1.28615e-21	9.59777e-21	4.70999	4.83027	3.36488	3.44428	hypothetical protein	0
GHT09_002995	-4.11605	3.53829	354.28	1.94598e-78	5.45803e-77	4.37492	4.73287	-0.0771072	0.939781	chondroitin sulfate proteoglycan 5	CSPG5
GHT09_002998	-4.701	-0.408004	24.1189	9.10567e-07	3.18373e-06	1.08479	-0.329951	-1.87352	-2.5025	15 kDa protein B-like	0
GHT09_003000	1.1064	1.65546	12.2348	0.000469551	0.00128851	0.591662	1.29071	1.90481	2.10605	hypothetical protein	0
GHT09_003004	1.27247	5.15848	109.414	1.41797e-25	1.22539e-24	4.33157	4.39364	5.63926	5.61881	coiled-coil domain-containing protein 12	CCDC12
GHT09_003012	1.67923	5.51623	201.703	1.70509e-45	2.58136e-44	4.10149	4.68159	6.03898	6.13807	hypothetical protein	0
GHT09_003022	-3.72984	1.89709	115.79	5.74012e-27	5.19644e-26	2.93505	2.88737	-0.0771072	-0.827436	C-C chemokine receptor type 1	CCR1
GHT09_003032	3.01343	1.00865	37.6832	8.39754e-10	3.61409e-09	-0.771375	-1.04092	1.70594	1.62266	hypothetical protein	0
GHT09_003033	10.0365	5.95271	1482.5	1.17920129889868e-318	2.99298757845459e-316	-1.84261	-1.83829	6.87344	6.9304	CUB domain-containing protein 1	CDCP1
GHT09_003034	-2.13327	-0.798057	5.85454	0.0155412	0.0352429	-0.16343	-0.154015	-1.10229	-2.05301	tetranectin	CLEC3B
GHT09_003039	1.64854	3.33805	72.0582	2.1582e-17	1.35565e-16	2.48565	1.96015	3.71137	3.97484	hypothetical protein	0
GHT09_003040	1.84351	5.63676	245.631	3.36503e-55	6.25512e-54	4.38908	4.44238	6.3753	6.12613	kinesin protein KIF15-like	KIF15
GHT09_003041	1.93865	4.79579	203.216	5.34221e-46	8.18409e-45	3.39417	3.57764	5.40651	5.41578	uncharacterized protein	0
GHT09_003043	-3.94646	0.959253	64.4554	1.01346e-15	5.91251e-15	2.19453	1.71014	-0.83081	-1.7108	hypothetical protein	0
GHT09_003045	-9.68086	2.06264	221.542	5.62871e-50	9.49308e-49	3.32219	3.07571	-2.5025	-2.5025	zinc finger protein 197	ZNF197
GHT09_003047	-10.2207	2.5979	313.489	6.9013e-70	1.65366e-68	3.9085	3.53974	-2.5025	-2.5025	hypothetical protein	0
GHT09_003050	10.4595	3.11852	327.764	5.67116e-73	1.44478e-71	-2.5025	-2.5025	3.9551	3.98663	neuropilin and tolloid protein 2-like	NETO2
GHT09_003063	-7.84075	0.343574	63.2181	1.89736e-15	1.09327e-14	1.55574	1.29071	-2.5025	-2.5025	G protein-regulated inducer of neurite outgrowth 3	GPRIN3
GHT09_003065	-9.62269	2.0054	212.971	4.0747e-48	6.60661e-47	3.09911	3.19429	-2.5025	-2.5025	docking protein 5	DOK5
GHT09_003069	-7.61994	0.152817	53.4742	2.66772e-13	1.39202e-12	0.859193	1.51561	-2.5025	-2.5025	translocating chain-associated membrane protein 1 1-like	TRAM1L1
GHT09_003081	1.10408	5.67815	96.8523	7.91665e-23	6.19089e-22	4.88509	5.11863	6.13317	6.08147	TPR and ankyrin repeat-containing protein 1	TRANK1
GHT09_003083	1.04888	5.07559	74.1618	7.44824e-18	4.77631e-17	4.54901	4.31356	5.40979	5.53899	DNA mismatch repair protein Mlh1	MLH1
GHT09_003092	-3.97821	-0.913813	12.2193	0.000473482	0.0012986	-0.339066	0.14419	-2.5025	-2.05301	hypothetical protein	0
GHT09_003098	-3.88776	6.55588	1116.29	1.6474e-241	2.47218e-239	7.47784	7.50275	3.53056	3.68761	PDZK1-interacting protein 1	PDZK1IP1
GHT09_003100	-9.47027	1.85638	191.971	1.47978e-43	2.13195e-42	2.7499	3.21047	-2.5025	-2.5025	cytochrome P450 4A5-like	0
GHT09_003110	6.86917	-0.151218	27.2123	1.8318e-07	6.74788e-07	-2.5025	-2.5025	0.610295	0.487649	amphoterin-induced protein 2	AMIGO2
GHT09_003113	3.35857	-0.186871	15.7903	7.08867e-05	0.000211395	-1.84261	-1.83829	0.307153	0.487649	poly(U)-specific endoribonuclease	ENDOU
GHT09_003115	1.27076	5.67434	126.235	3.16931e-29	3.09244e-28	4.66994	5.07071	6.07244	6.21776	heme transporter HRG1	SLC48A1
GHT09_003116	2.26225	3.52485	134.214	5.48182e-31	5.63222e-30	1.94896	1.96015	4.2611	4.08313	hypothetical protein	0
GHT09_003117	2.36263	8.49313	712.685	1.11429e-155	7.92691e-154	6.81709	6.9189	9.23277	9.22693	histone deacetylase 7	HDAC7
GHT09_003118	5.53751	5.44478	978.679	2.41851e-212	2.84127e-210	1.2177	0.602018	6.34138	6.36617	hypothetical protein	0
GHT09_003119	5.28167	7.20064	1805.23	0	0	2.72778	3.03996	8.1433	8.14031	vitamin D3 receptor	VDR
GHT09_003129	5.78315	1.89497	123.908	9.69886e-29	9.31335e-28	-1.84261	-1.83829	2.66638	2.70009	carboxypeptidase M	CPM
GHT09_003132	1.19696	6.78331	154.024	2.64782e-35	3.08772e-34	6.13092	5.97288	7.26399	7.23471	hypothetical protein	0
GHT09_003141	-5.38976	6.68812	1681.84	0	0	7.76052	7.59802	2.70956	1.99369	retinal dehydrogenase 1	ALDH1A1
GHT09_003147	1.34243	0.864208	9.82432	0.00172341	0.00442342	-0.00687362	0.14419	1.13857	1.35802	hypothetical protein	0
GHT09_003156	4.68023	1.75578	99.0252	2.71395e-23	2.15512e-22	-2.5025	-0.763173	2.42868	2.58071	matrix metalloproteinase-15	MMP15
GHT09_003164	-1.81282	6.41561	309.74	4.46189e-69	1.05682e-67	7.02864	7.11742	5.24714	5.28105	kinesin protein KIFC3-like	KIFC3
GHT09_003165	1.09039	5.70751	95.3472	1.69014e-22	1.30043e-21	5.124	4.96029	6.04321	6.20772	katanin p80 WD40 repeat-containing subunit B1	KATNB1
GHT09_003201	2.76444	4.72775	344.276	1.53716e-76	4.19687e-75	2.68249	2.7831	5.54705	5.39159	T-lymphoma invasion and metastasis-inducing protein 1	TIAM1
GHT09_003206	-2.13525	1.26877	34.6615	3.95344e-09	1.63145e-08	1.74383	2.29949	0.307153	-0.0731063	hypothetical protein	0
GHT09_003207	-2.44785	2.59861	102.342	4.98435e-24	4.08097e-23	3.1828	3.67409	0.781941	1.28352	hypothetical protein	0
GHT09_003208	1.58685	2.69473	45.3812	1.64315e-11	7.83066e-11	1.74383	1.56676	3.13081	3.24274	hypothetical protein	0
GHT09_003209	-7.89822	0.393837	65.8601	4.97401e-16	2.94191e-15	1.60511	1.3503	-2.5025	-2.5025	melanocortin-2 receptor accessory protein	MRAP
GHT09_003214	1.95997	5.9791	298.158	3.20123e-66	7.27227e-65	4.57402	4.76059	6.82026	6.40951	synaptojanin-1	SYNJ1
GHT09_003216	3.12975	2.50501	111.551	4.83919e-26	4.25348e-25	0.490195	0.00277842	3.13081	3.27194	uncharacterized protein	0
GHT09_003218	2.98275	-0.462483	10.5144	0.00118545	0.00310505	-1.39151	-2.5025	0.0626637	0.110509	oligodendrocyte transcription factor 2	OLIG2
GHT09_003219	3.03958	-1.04567	5.72698	0.0167106	0.0377573	-1.84261	-2.5025	-0.602418	-0.530011	oligodendrocyte transcription factor 1	OLIG1
GHT09_003221	1.14387	5.18979	90.4893	1.95669e-21	1.44964e-20	4.57402	4.39364	5.71272	5.54099	interferon alpha/beta receptor 1	IFNAR1
GHT09_003222	1.16049	4.62506	75.9652	2.99272e-18	1.9483e-17	4.07545	3.70866	5.013	5.09207	hypothetical protein	0
GHT09_003225	1.03582	8.35661	150.839	1.30728e-34	1.49896e-33	7.85984	7.61862	8.78679	8.77246	trifunctional purine biosynthetic protein adenosine-3	GART
GHT09_003227	1.02898	7.01435	122.011	2.51596e-28	2.38367e-27	6.43217	6.372	7.48434	7.37587	hypothetical protein	0
GHT09_003228	1.50413	5.26467	153.735	3.06e-35	3.5603e-34	4.28689	4.31356	5.85412	5.74217	protein downstream neighbor of Son	DONSON
GHT09_003229	1.24237	4.6985	88.8191	4.5433e-21	3.31735e-20	3.77466	4.05158	5.08445	5.20991	quinone oxidoreductase protein 1	CRYZL1
GHT09_003230	1.45158	5.50864	154.669	1.91563e-35	2.24919e-34	4.69296	4.46951	6.08274	5.98191	protein ecdysoneless	ECD
GHT09_003235	1.09758	5.99955	103.296	3.08313e-24	2.53849e-23	5.33989	5.32952	6.45675	6.40293	serine/threonine-protein phosphatase 2B catalytic subunit beta	PPP3CB
GHT09_003236	1.31091	5.40406	124.518	7.14008e-29	6.88522e-28	4.43758	4.71598	5.92453	5.8542	inactive ubiquitin carboxyl-terminal hydrolase 54	USP54
GHT09_003238	3.24275	-0.920409	7.1244	0.00760715	0.0180241	-2.5025	-1.83829	-0.405289	-0.401522	myozenin-1	MYOZ1
GHT09_003239	1.45848	0.947073	12.0319	0.000523524	0.00142918	-0.339066	0.391189	1.20041	1.4964	synaptopodin 2 protein	SYNPO2L
GHT09_003243	1.04467	7.28849	133.752	6.91264e-31	7.0705e-30	6.5861	6.74384	7.76131	7.65979	zinc finger SWIM domain-containing protein 8	ZSWIM8
GHT09_003244	1.09454	4.29197	58.3441	2.24808e-14	1.23216e-13	3.69709	3.52688	4.64714	4.74171	bifunctional heparan sulfate N-deacetylase/N-sulfotransferase 2	NDST2
GHT09_003245	1.17076	4.80871	83.0111	8.51667e-20	5.8875e-19	4.00363	4.15548	5.13679	5.33277	calcium/calmodulin-dependent protein kinase type II subunit gamma	CAMK2G
GHT09_003246	2.96297	5.30563	475.612	7.58142e-105	3.11111e-103	3.1499	3.12773	5.98289	6.16036	urokinase-type plasminogen activator	PLAU
GHT09_003251	1.35172	5.40447	131.735	1.90259e-30	1.92496e-29	4.54269	4.56694	6.01552	5.78669	histone acetyltransferase KAT6B	KAT6B
GHT09_003253	1.67259	2.64241	48.0865	4.17419e-12	2.04912e-11	1.15278	1.84056	2.83185	3.36521	dual specificity protein phosphatase 13	DUSP13
GHT09_003259	-1.32913	1.55146	18.0648	2.13982e-05	6.69293e-05	2.05936	2.17317	0.516152	1.07845	hypothetical protein	0
GHT09_003264	1.18116	3.81041	51.7706	6.34419e-13	3.25587e-12	3.06423	3.07571	4.25383	4.21927	hypothetical protein	0
GHT09_003272	-1.62408	8.25183	357.961	1.70557e-79	4.8499e-78	8.8751	8.82875	7.2421	7.21668	60S ribosomal protein L5	RPL5
GHT09_003280	-5.42399	-1.41249	9.0302	0.00265716	0.00667113	-1.04838	-0.329951	-2.5025	-2.5025	hypothetical protein	0
GHT09_003281	-1.69452	0.572134	13.9938	0.000183667	0.000526712	1.15278	1.29071	-0.0771072	-0.401522	hypothetical protein	0
GHT09_003282	-1.15554	4.78341	84.133	4.83385e-20	3.38139e-19	5.24963	5.30337	4.23178	4.03852	hypothetical protein	0
GHT09_003284	-6.75709	-0.5419	26.6492	2.45089e-07	8.94988e-07	0.134344	0.696902	-2.5025	-2.5025	neuritin	NRN1
GHT09_003289	-4.99573	2.45393	219.821	4.14131e-49	6.87176e-48	3.01028	3.92989	-0.602418	-1.20254	protein phosphatase 1 regulatory subunit 3G	PPP1R3G
GHT09_003291	-6.69316	-0.589524	25.3087	4.90546e-07	1.74665e-06	0.591662	0.14419	-2.5025	-2.5025	hypothetical protein	0
GHT09_003292	-3.25441	-1.33056	5.89485	0.0151895	0.0345206	-0.16343	-1.38521	-2.5025	-2.05301	guanylin	GUCA1A
GHT09_003294	-2.24709	-0.745339	6.77959	0.00922391	0.0215812	-0.339066	0.14419	-2.5025	-1.20254	hypothetical protein	0
GHT09_003295	-3.84452	0.366722	40.6998	1.79388e-10	8.07894e-10	0.938376	1.66392	-1.87352	-1.4344	hypothetical protein	0
GHT09_003296	2.33698	-0.502975	7.34654	0.006722	0.0160285	-1.84261	-1.38521	0.516152	-0.530011	zinc finger MYND domain-containing protein 12	ZMYND12
GHT09_003300	-8.26926	0.724478	85.2923	2.69266e-20	1.90849e-19	1.60511	2.03471	-2.5025	-2.5025	claudin-19	CLDN19
GHT09_003308	2.43547	0.136591	14.4183	0.000146581	0.000424266	-1.04838	-1.38521	0.860668	0.552542	non-histone chromosomal protein HMG-17	HMGN2
GHT09_003321	-7.05835	2.97912	366.711	3.0452e-81	8.86774e-80	4.08418	4.11309	-1.10229	-2.5025	hypothetical protein	0
GHT09_003322	-10.1723	6.54886	2188.63	0	0	7.58323	7.57713	-1.43697	-1.7108	tyrosine-protein kinase receptor Tie-1	TIE1
GHT09_003324	1.02418	7.00921	120.816	4.84265e-28	4.55652e-27	6.55973	6.22054	7.36788	7.47389	cell division cycle protein 20-like	CDC20
GHT09_003326	1.35409	4.50829	95.8489	1.3126e-22	1.01564e-21	3.65082	3.63867	4.79979	5.13243	mediator of RNA polymerase II transcription subunit 8	MED8
GHT09_003329	-1.1912	3.99227	62.4232	2.83882e-15	1.62166e-14	4.38202	4.62238	3.36488	3.30056	hypothetical protein	0
GHT09_003332	-2.42058	0.25953	20.143	7.20585e-06	2.34147e-05	0.859193	1.22854	-1.43697	-0.671073	hypothetical protein	0
GHT09_003338	2.10764	1.8895	42.7377	6.33252e-11	2.93089e-10	0.490195	0.500452	2.52851	2.4161	coiled-coil domain-containing protein 24	CCDC24
GHT09_003347	1.74496	7.06845	335.267	1.35684e-74	3.57631e-73	6.05966	5.79931	7.63961	7.71355	kinesin protein KIF2C	KIF2C
GHT09_003360	1.89116	3.08863	78.0205	1.05919e-18	7.01092e-18	2.09436	1.46259	3.56623	3.72328	uncharacterized protein	0
GHT09_003363	-1.13279	6.78116	140.961	1.8539e-32	1.98512e-31	7.31213	7.18342	6.17035	6.06905	alcohol dehydrogenase NADP(+)	0
GHT09_003371	-4.88462	2.62109	239.925	5.80273e-54	1.0548e-52	3.55357	3.8392	-1.10229	-0.530011	tetraspanin-1	TSPAN1
GHT09_003373	-2.98843	3.58563	243.631	9.13014e-55	1.68196e-53	4.43758	4.56694	1.66265	1.52901	leucine rich adaptor protein 1	LURAP1
GHT09_003376	1.08259	3.02455	28.1193	1.1465e-07	4.28484e-07	2.53743	2.13978	3.44372	3.38316	5-methylcytosine rRNA methyltransferase NSUN4	NSUN4
GHT09_003382	5.64272	-1.04643	9.99682	0.00156925	0.00404642	-2.5025	-2.5025	-0.602418	-0.401522	hypothetical protein	0
GHT09_003383	1.13194	3.06277	31.2755	2.25308e-08	8.86018e-08	2.25764	2.44328	3.33762	3.55136	MAP kinase-interacting serine/threonine-protein kinase 1	MKNK1
GHT09_003394	-3.05778	4.34091	376.182	2.70587e-83	8.21714e-82	5.42484	5.04839	2.349	2.14865	heparan sulfate glucosamine 3-O-sulfotransferase 2	HS3ST2
GHT09_003405	1.88984	6.79024	360.412	5.0445e-80	1.44644e-78	5.54356	5.53932	7.32774	7.5172	eukaryotic elongation factor 2 kinase	EEF2K
GHT09_003417	5.04636	4.60898	632.567	1.54811e-138	9.41644e-137	0.77541	0.391189	5.48316	5.47974	hypothetical protein	0
GHT09_003420	1.40657	3.23152	51.3151	7.99842e-13	4.08241e-12	2.31811	2.32942	3.58953	3.78535	MORN repeat-containing protein 4	MORN4
GHT09_003421	-1.22489	5.45359	115.846	5.58058e-27	5.05646e-26	6.02833	5.89497	4.61343	4.84571	4-hydroxy-2-oxoglutarate aldolase mitochondrial	HOGA1
GHT09_003424	1.23687	6.7678	163.332	2.4933e-37	3.0898e-36	6.02607	5.99405	7.21145	7.27613	MMS19 nucleotide excision repair protein	MMS19
GHT09_003426	1.06041	5.0428	74.8984	5.13212e-18	3.31068e-17	4.33889	4.44921	5.34965	5.53297	hypothetical protein	0
GHT09_003429	2.037	3.52868	114.101	1.34237e-26	1.20356e-25	1.98671	2.26893	4.00795	4.22426	hypothetical protein	0
GHT09_003432	1.64532	3.0182	59.1581	1.48733e-14	8.21987e-14	1.78726	2.07059	3.53056	3.5434	rho GTPase-activating protein 19	ARHGAP19
GHT09_003436	1.00718	4.11737	45.6025	1.46776e-11	7.0274e-11	3.29235	3.6857	4.61343	4.39322	uncharacterized protein	0
GHT09_003443	2.86863	4.87415	385.817	3.84228e-85	1.18431e-83	3.11624	2.35874	5.57941	5.66723	B-cell linker protein	BLNK
GHT09_003449	-1.17697	6.1188	125.524	4.30649e-29	4.18615e-28	6.56442	6.64616	5.48316	5.38493	BCL-6 corepressor	BCOR
GHT09_003450	-1.7846	2.04085	42.5154	7.09385e-11	3.27368e-10	2.63574	2.84656	0.860668	1.16401	ras-GEF domain-containing family member 1B	RASGEF1B
GHT09_003463	-1.18504	4.79033	88.6606	4.92152e-21	3.588e-20	5.23794	5.34792	4.1242	4.11033	heparanase	HPSE
GHT09_003467	-2.45418	2.81976	116.27	4.50889e-27	4.10169e-26	3.68566	3.65057	1.25972	1.32125	hypothetical protein	0
GHT09_003470	-2.2089	1.38733	39.7015	2.99965e-10	1.32909e-09	2.45904	1.84056	0.610295	-0.283546	phosphatidate cytidylyltransferase 1	CDS1
GHT09_003476	1.81245	5.63148	238.309	1.30065e-53	2.34973e-52	4.51066	4.35051	6.20093	6.27055	hypothetical protein	0
GHT09_003478	1.28597	2.02853	20.5752	5.74971e-06	1.8838e-05	1.3394	1.09554	2.37605	2.50075	serpin B9	SERPINB9
GHT09_003481	3.03958	-1.04567	5.72698	0.0167106	0.0377573	-1.84261	-2.5025	-0.602418	-0.530011	hypothetical protein	0
GHT09_003488	-3.24883	-1.32988	5.87398	0.0153705	0.0348751	-0.16343	-1.38521	-1.87352	-2.5025	hypothetical protein	0
GHT09_003490	-2.50129	-0.591866	9.41683	0.00215142	0.00547415	0.262963	0.00277842	-1.87352	-1.4344	hypothetical protein	0
GHT09_003491	2.02793	6.21933	342.267	4.17335e-76	1.13342e-74	4.81338	4.89674	6.86272	6.89095	polypeptide N-acetylgalactosaminyltransferase 12	GALNT12
GHT09_003495	1.08948	6.40004	115.287	7.39322e-27	6.6724e-26	5.6966	5.78857	6.82026	6.83987	hypothetical protein	0
GHT09_003504	-1.11399	5.3214	93.1859	5.02388e-22	3.80708e-21	5.80885	5.78318	4.60202	4.75556	peroxisomal membrane protein 4-like	PXMP4
GHT09_003506	-1.87621	0.753669	19.2009	1.17949e-05	3.76948e-05	1.2177	1.66392	-0.602418	0.0216203	N-terminal EF-hand calcium-binding protein 3	NECAB3
GHT09_003509	-3.96132	7.5477	1487.07	1.29405673958739e-319	3.36765964243038e-317	8.46673	8.4797	4.59051	4.4624	phosphotriesterase-related protein	PTER
GHT09_003511	1.4332	2.89744	43.0895	5.29122e-11	2.46113e-10	2.02349	1.92138	3.33762	3.39205	tRNA (cytosine(38)-C(5))-methyltransferase	TRDMT1
GHT09_003512	2.04693	10.7405	577.665	9.07653e-127	4.77249e-125	9.29291	9.46172	11.3972	11.455	vimentin	VIM
GHT09_003514	-7.41438	6.23874	1765.05	0	0	7.09279	7.42519	0.516152	-0.283546	insulin growth factor-binding protein 3-like	IGFBP3
GHT09_003515	-10.2211	2.59806	313.545	6.71303e-70	1.61042e-68	3.73085	3.74241	-2.5025	-2.5025	hypothetical protein	0
GHT09_003516	-10.6306	3.00982	405.798	8.18432e-90	2.74489e-88	3.96633	4.2985	-2.5025	-2.5025	hypothetical protein	0
GHT09_003538	1.30675	6.79774	182.734	1.50456e-41	2.0746e-40	6.05966	5.91731	7.2375	7.34758	DNA polymerase delta subunit 2	POLD2
GHT09_003539	3.84195	2.0595	103.559	2.70041e-24	2.22605e-23	-0.539088	-0.763173	2.73068	2.84961	adipocyte enhancer-binding protein 1	AEBP1
GHT09_003556	-1.1896	6.2601	133.611	7.4174e-31	7.57548e-30	6.80921	6.68719	5.69134	5.43741	syntaxin-binding protein 3	STXBP3
GHT09_003562	8.99317	1.74086	126.61	2.49549e-29	2.44542e-28	-2.5025	-2.5025	2.26465	2.71434	hypothetical protein	0
GHT09_003563	7.50431	0.372821	44.8753	2.12693e-11	1.00848e-10	-2.5025	-2.5025	1.37148	0.890429	hypothetical protein	0
GHT09_003565	-2.91026	7.06144	837.73	2.23839e-175	1.91746e-173	7.66117	8.10465	4.9648	5.02219	cadherin EGF LAG seven-pass G-type receptor 2	CELSR2
GHT09_003568	3.99916	7.60602	1455.47	5.52110352305864e-313	1.35129008726861e-310	4.46459	4.56064	8.53704	8.46818	sortilin	SORT1
GHT09_003573	5.73845	-0.982771	10.8197	0.00100512	0.00265436	-2.5025	-2.5025	-0.602418	-0.283546	putative G-protein coupled receptor 61	0
GHT09_003577	13.6046	6.14714	1644.42	0	0	-2.5025	-2.5025	7.10431	7.10348	hypothetical protein	0
GHT09_003578	6.67679	3.61582	410.927	1.0256e-90	3.47368e-89	-2.5025	-0.763173	4.54356	4.4239	hypothetical protein	0
GHT09_003579	-2.98885	0.679182	37.9248	7.42056e-10	3.20772e-09	1.55574	1.61616	-1.43697	-0.671073	glutathione S-transferase Mu 2-like	GSTM2
GHT09_003581	3.48515	4.89372	502.17	2.4665e-110	1.09051e-108	1.87037	2.57402	5.68595	5.71762	glutathione S-transferase Mu 1	GSTM1
GHT09_003584	1.40642	7.13958	228.503	1.73926e-51	3.0303e-50	6.21283	6.30956	7.61143	7.71753	macrophage colony-stimulating factor 1	CSF1
GHT09_003585	1.56622	7.17261	281.695	5.20353e-63	1.11903e-61	6.06849	6.2773	7.65971	7.81457	hypothetical protein	0
GHT09_003587	-10.4545	2.83234	361.632	2.75086e-80	7.94311e-79	3.9851	3.94929	-2.5025	-2.5025	hypothetical protein	0
GHT09_003589	-2.35848	2.22712	76.8021	1.96046e-18	1.2836e-17	3.26189	2.82572	0.781941	0.839329	hypothetical protein	0
GHT09_003591	-8.92407	1.3315	134.18	9.27485e-31	9.45841e-30	1.87037	2.88737	-2.5025	-2.5025	inward rectifier potassium channel 16	KCNJ16
GHT09_003596	4.87286	5.38167	865.695	2.54453e-188	2.43316e-186	1.65285	1.29071	6.19714	6.33768	hypothetical protein	0
GHT09_003599	7.8575	0.678857	57.5907	3.2955e-14	1.79191e-13	-2.5025	-2.5025	1.74797	1.16401	somatostatin receptor type 2	SSTR2
GHT09_003609	5.02101	-1.41736	6.00407	0.014277	0.0325846	-2.5025	-2.5025	-1.10229	-0.827436	hypothetical protein	0
GHT09_003610	3.79213	-0.55182	12.4705	0.000413876	0.00114121	-1.84261	-2.5025	0.190081	-0.0731063	hypothetical protein	0
GHT09_003611	-2.09972	2.19921	62.1462	3.26692e-15	1.86258e-14	2.81429	3.12773	1.25972	0.731355	hypothetical protein	0
GHT09_003619	-2.96522	-0.286755	16.3122	5.38152e-05	0.000162108	0.77541	0.272969	-1.43697	-1.7108	protein shisa-2-like	SHISA2
GHT09_003625	-4.18339	0.924826	66.9232	2.90309e-16	1.73452e-15	1.55574	2.26893	-1.43697	-1.4344	hypothetical protein	0
GHT09_003626	-1.17902	1.49567	13.8483	0.000198439	0.000567651	1.94896	2.07059	0.781941	0.987501	contactin-1	CNTN1
GHT09_003628	-1.15182	5.41526	100.141	8.37609e-23	6.53774e-22	5.58106	6.16145	4.94687	4.56426	leucine-rich repeat serine/threonine-protein kinase 2	LRRK2
GHT09_003629	1.34354	2.28052	26.3037	2.93045e-07	1.06368e-06	1.3394	1.51561	2.68813	2.74243	hypothetical protein	0
GHT09_003633	1.68713	4.8375	162.522	3.74086e-37	4.61912e-36	3.68566	3.7754	5.56773	5.24469	hypothetical protein	0
GHT09_003634	1.60513	3.94177	96.7894	8.17159e-23	6.38054e-22	2.79314	2.98461	4.62475	4.33446	hypothetical protein	0
GHT09_003636	-8.81154	4.76156	1052.97	4.22327e-228	5.90655e-226	5.82457	5.8518	-1.87352	-1.7108	GRAM domain-containing protein 1C	GRAMD1C
GHT09_003637	-2.58906	2.63429	113.723	1.62328e-26	1.451e-25	3.5282	3.48761	0.93532	1.07845	palmitoyltransferase ZDHHC23	ZDHHC23
GHT09_003638	-1.26589	3.11471	43.3658	4.59508e-11	2.14413e-10	3.65082	3.67409	2.45429	2.39856	hypothetical protein	0
GHT09_003640	-1.33034	2.68119	36.6929	1.39482e-09	5.9248e-09	3.08178	3.4057	1.97727	1.94618	multiple C2 and transmembrane domain-containing protein 2	MCTP2
GHT09_003650	-1.40503	6.5504	199.896	2.80982e-45	4.24134e-44	7.10571	7.09799	5.83475	5.56675	hypothetical protein	0
GHT09_003656	-1.7073	4.57239	160.779	9.46526e-37	1.15693e-35	5.05016	5.39112	3.65726	3.43571	nicotinamide riboside kinase 1	NMRK1
GHT09_003668	1.73824	6.43731	279.215	1.79068e-62	3.81498e-61	5.31414	5.29582	7.04339	7.03487	tyrosine-protein phosphatase non-receptor type 21	PTPN21
GHT09_003669	-1.03078	2.72881	23.0943	1.54791e-06	5.30214e-06	3.30735	3.07571	2.349	2.06215	hypothetical protein	0
GHT09_003676	1.08039	6.7714	126.203	3.06181e-29	2.99039e-28	6.13092	6.11496	7.17341	7.22789	condensin complex subunit 3	NCAPG
GHT09_003687	-2.25341	4.95046	300.931	3.58426e-67	8.28894e-66	5.65325	5.78857	3.57793	3.40967	desmocollin-2	DSC2
GHT09_003691	-6.0491	-1.03916	15.0008	0.000107633	0.000315128	-0.00687362	-0.329951	-2.5025	-2.5025	hypothetical protein	0
GHT09_003700	1.54324	7.38048	286.917	3.85607e-64	8.45169e-63	6.4643	6.33928	7.96825	7.92131	synaptojanin-2	SYNJ2
GHT09_003704	-1.06237	1.76947	13.463	0.000243624	0.000689518	2.31811	2.17317	1.5244	0.987501	lamin tail domain-containing protein 1	LMNTD1
GHT09_003708	-1.60938	6.77118	274.599	1.78733e-61	3.73433e-60	7.34882	7.40337	5.7927	5.74911	geranylgeranyl transferase type-2 subunit beta	RABGGTB
GHT09_003709	-1.16444	6.03139	119.493	8.92033e-28	8.3247e-27	6.51038	6.51883	5.50477	5.20487	medium-chain specific acyl-CoA dehydrogenase mitochondrial	ACADM
GHT09_003714	-1.37224	6.59011	193.84	5.8086e-44	8.45744e-43	7.21807	7.04261	5.69403	5.82331	phosphatidylserine synthase 1	PTDSS1
GHT09_003718	3.71199	0.551683	33.5456	7.01193e-09	2.84785e-08	-1.84261	-1.38521	1.07395	1.32125	hypothetical protein	0
GHT09_003719	-1.24208	0.672262	8.50598	0.00354172	0.00876858	1.27983	1.09554	-0.231886	0.273371	hypothetical protein	0
GHT09_003721	3.4229	6.09017	742.911	3.88012e-162	2.97654e-160	3.33687	3.6857	6.98088	6.87041	DEP domain-containing mTOR-interacting protein	DEPTOR
GHT09_003722	1.40784	5.04516	126.919	2.13668e-29	2.0978e-28	4.11859	4.18032	5.56479	5.53498	sister chromatid cohesion protein DCC1	DSCC1
GHT09_003730	-1.27985	3.31929	49.5993	1.92763e-12	9.66353e-12	3.67414	4.04258	2.87041	2.3808	phosphatidylinositol N-acetylglucosaminyltransferase subunit A	PIGA
GHT09_003731	6.28361	-0.600736	16.9151	3.91658e-05	0.000119273	-2.5025	-2.5025	-0.0771072	0.110509	vascular endothelial growth factor D	VEGFD
GHT09_003734	3.75643	2.66474	151.267	1.05466e-34	1.21133e-33	-0.00687362	-0.154015	3.48158	3.37421	carbonic anhydrase 5B mitochondrial	CA5B
GHT09_003757	-3.25473	-1.33052	5.89613	0.0151784	0.0345039	-0.771375	-0.530361	-2.5025	-2.05301	T-lymphocyte activation antigen CD86	CD86
GHT09_003763	-1.91797	1.7556	39.9126	2.68297e-10	1.19242e-09	2.56265	2.41564	0.781941	0.614642	WD repeat-containing protein 5B	WDR5B
GHT09_003766	5.02624	-1.41668	6.02146	0.014137	0.0322997	-2.5025	-2.5025	-0.83081	-1.00283	hypothetical protein	0
GHT09_003770	-2.17611	6.28042	411.507	4.81348e-91	1.64113e-89	6.99547	7.03468	4.95138	4.74865	sorting nexin-10	SNX10
GHT09_003773	-2.22229	2.93952	106.914	4.98953e-25	4.20926e-24	3.82762	3.65057	1.57197	1.59211	hypothetical protein	0
GHT09_003775	-1.83347	3.66877	115.966	5.25356e-27	4.76856e-26	4.16048	4.56064	2.57595	2.56507	phosphatidate phosphatase LPIN3	LPIN3
GHT09_003780	1.2838	1.8822	18.5285	1.67769e-05	5.295e-05	1.08479	1.09554	2.52851	2.10605	transcription factor MafB	MAFB
GHT09_003781	-2.15092	1.75355	48.6713	3.07227e-12	1.5198e-11	2.65931	2.41564	-0.0771072	0.839329	hypothetical protein	0
GHT09_003783	1.16565	5.84319	111.704	4.65919e-26	4.09878e-25	5.32155	4.9067	6.26565	6.31448	protein FAM83D	FAM83D
GHT09_003791	-11.8686	6.505	2175.61	0	0	7.2601	7.77155	-2.5025	-2.05301	lipopolysaccharide-binding protein	LBP
GHT09_003792	-5.57267	-1.32974	10.1862	0.00141599	0.00367323	-1.04838	-0.154015	-2.5025	-2.5025	hypothetical protein	0
GHT09_003794	-4.11255	4.58417	612.991	2.42087e-134	1.37869e-132	5.52764	5.62928	1.5244	1.56091	uncharacterized protein	0
GHT09_003817	-1.00183	6.86343	113.411	1.8988e-26	1.69213e-25	7.39605	7.17108	6.26203	6.31097	uncharacterized protein	0
GHT09_003819	-1.97446	6.87725	411.725	9.90293e-91	3.35964e-89	7.65605	7.47205	5.40979	5.74391	myosin regulatory light polypeptide 9	MYL9
GHT09_003832	-1.67537	6.22333	253.019	8.43291e-57	1.63097e-55	6.84818	6.85346	5.13283	5.21993	ubiquinol-cytochrome-c reductase complex assembly factor 1	UQCC1
GHT09_003833	-3.87506	-0.974775	11.0729	0.000877123	0.00233373	-1.39151	0.500452	-1.87352	-2.5025	protein FAM83C	FAM83C
GHT09_003835	2.17483	0.164141	12.5437	0.000397976	0.00110032	-1.04838	-1.04092	0.698669	0.674178	hypothetical protein	0
GHT09_003837	-1.09346	1.28828	10.3864	0.00127046	0.00331843	1.55574	1.96015	0.860668	0.674178	endothelial protein C receptor	PROCR
GHT09_003839	1.18745	5.93035	118.075	1.8192e-27	1.68245e-26	5.15748	5.24569	6.4117	6.36165	phosphatidylinositol 3-kinase regulatory subunit alpha	PIK3R1
GHT09_003859	-7.75045	0.26487	59.2396	1.42704e-14	7.89729e-14	1.08479	1.56676	-2.5025	-2.5025	hypothetical protein	0
GHT09_003863	2.13189	2.02181	47.7105	5.01204e-12	2.45048e-11	0.68646	0.500452	2.52851	2.65648	integrin beta-6	ITGB6
GHT09_003867	-1.47594	4.91556	140.458	2.38712e-32	2.54416e-31	5.59028	5.41923	3.92794	4.1264	TRAF family member-associated NF-kappa-B activator	TANK
GHT09_003872	3.24123	4.24507	335.395	1.27345e-74	3.36083e-73	1.87037	1.79838	4.98691	5.03927	E3 ubiquitin-protein ligase RNF144B	RNF144B
GHT09_003875	-1.13461	3.68049	47.8474	4.67442e-12	2.28867e-11	4.0128	4.32845	3.17769	2.96137	thiopurine S-methyltransferase	TPMT
GHT09_003886	-5.82418	1.77015	155.598	1.20229e-35	1.4263e-34	2.65931	3.07571	-1.43697	-2.05301	hypothetical protein	0
GHT09_003887	1.56117	5.28126	165.294	9.33135e-38	1.16906e-36	4.24077	4.30605	5.85892	5.79677	E3 ubiquitin-protein ligase MYLIP	MYLIP
GHT09_003890	-3.86121	3.08166	253.978	5.22651e-57	1.01561e-55	3.95685	4.22876	0.190081	0.552542	CD83 antigen	CD83
GHT09_003893	-3.46071	8.37316	1365.99	3.47108e-294	7.06554e-292	9.15415	9.35187	5.81017	5.79005	glutamate--cysteine ligase catalytic subunit	GCLC
GHT09_003894	-12.0101	4.42175	920.731	4.96177e-200	5.12608e-198	5.37945	5.63529	-2.5025	-2.5025	kelch protein 31-like	KLHL31
GHT09_003898	1.04552	5.92281	92.413	7.41781e-22	5.58209e-21	5.19021	5.39112	6.46307	6.20772	hypothetical protein	0
GHT09_003899	1.03344	4.61629	60.7786	6.53671e-15	3.66981e-14	4.08418	3.88021	5.13679	4.89346	hypothetical protein	0
GHT09_003903	1.4891	7.22493	259.504	5.80825e-58	1.15151e-56	6.3603	6.20851	7.58487	7.93507	dual specificity protein phosphatase 5	DUSP5
GHT09_003904	1.32468	4.90896	108.238	2.56291e-25	2.18816e-24	4.06667	4.07827	5.33937	5.43096	survival of motor neuron-related-splicing factor 30	SMNDC1
GHT09_003905	-1.26447	5.56825	126.168	3.11588e-29	3.04176e-28	5.96828	6.19841	4.91955	4.74519	max-interacting protein 1	MXI1
GHT09_003907	1.72036	-0.149411	6.46446	0.0110089	0.0254753	-0.771375	-1.38521	0.190081	0.348389	hypothetical protein	0
GHT09_003911	1.28676	5.0877	109.163	1.60892e-25	1.38691e-24	4.35341	4.20474	5.57358	5.54896	E3 ubiquitin-protein ligase CBL-B	CBLB
GHT09_003915	2.87769	1.21397	41.7114	1.06969e-10	4.88163e-10	-0.771375	-0.530361	2.04626	1.71059	hypothetical protein	0
GHT09_003916	1.69417	7.02953	314.445	4.28967e-70	1.03027e-68	5.9397	5.93201	7.66794	7.58712	2-phosphoxylose phosphatase 1	PXYLP1
GHT09_003917	1.09157	8.22676	165.262	9.47976e-38	1.18693e-36	7.56853	7.58413	8.72796	8.60522	zinc finger and BTB domain-containing protein 38	ZBTB38
GHT09_003932	6.95808	-0.0821136	29.211	6.527e-08	2.47992e-07	-2.5025	-2.5025	0.781941	0.487649	procollagen C-endopeptidase enhancer 2	PCOLCE2
GHT09_003935	2.07792	4.98879	245.677	3.28893e-55	6.12474e-54	3.71968	3.4057	5.64483	5.62448	carbohydrate sulfotransferase 2	CHST2
GHT09_003936	-3.0814	3.43817	234.215	1.14609e-52	2.04535e-51	4.54901	4.1638	1.66265	1.12186	diacylglycerol O-acyltransferase 2	DGAT2
GHT09_003939	1.34617	10.4295	261.415	1.28008e-58	2.56753e-57	9.55854	9.64747	10.8421	11.0493	serpin H1	SERPINH1
GHT09_003940	2.68291	4.79821	339.757	1.4546e-75	3.92454e-74	2.7499	2.98461	5.4738	5.57262	glycerophosphodiester phosphodiesterase domain-containing protein 5	GDPD5
GHT09_003948	-4.23215	-0.742427	15.6165	7.7704e-05	0.000230955	0.381049	-0.154015	-1.87352	-2.5025	sialidase-3	NEU3
GHT09_003952	4.1052	4.10889	403.241	2.91072e-89	9.65185e-88	0.591662	1.22854	4.80974	5.02219	vesicular overexpressed in cancer prosurvival protein 1	VOPP1
GHT09_003954	-1.10376	2.53116	23.6243	1.17532e-06	4.07133e-06	2.97315	3.07571	1.86717	2.01688	hypothetical protein	0
GHT09_003964	3.48407	4.35319	387.595	9.48386e-86	2.9632e-84	1.27983	2.07059	5.07209	5.20487	protein bicaudal D 1	0
GHT09_003974	1.29227	9.0388	237.128	2.34519e-53	4.21457e-52	8.20175	8.29678	9.59866	9.48338	translocon-associated protein subunit alpha	SSR1
GHT09_003975	2.32388	3.76332	159.969	1.34463e-36	1.63189e-35	1.98671	2.26893	4.2611	4.53244	hypothetical protein	0
GHT09_003976	2.21209	5.11805	285.41	8.16968e-64	1.78681e-62	3.61511	3.56512	5.6751	5.8813	protein sprouty 4	0
GHT09_003977	5.42905	-1.18297	8.37956	0.00379665	0.00935578	-2.5025	-2.5025	-0.602418	-0.671073	fibroblast growth factor 1	FGF1
GHT09_003985	3.05184	3.97116	265.951	1.66402e-59	3.39391e-58	2.09436	1.22854	4.60774	4.79967	dual specificity protein phosphatase 4	DUSP4
GHT09_004010	1.08078	4.34026	58.2818	2.32029e-14	1.27106e-13	3.66253	3.6857	4.78473	4.71006	hypothetical protein	0
GHT09_004025	-1.33697	1.97088	23.9026	1.01714e-06	3.54069e-06	2.40431	2.6707	1.07395	1.39388	hypothetical protein	0
GHT09_004029	1.70672	5.32271	196.401	1.61364e-44	2.39012e-43	4.27168	4.1302	5.82742	5.96413	peptidyl-prolyl cis-trans isomerase NIMA-interacting 1	PIN1
GHT09_004030	1.23775	1.78134	16.2695	5.50392e-05	0.000165746	0.859193	1.16357	2.23541	2.14865	noelin-2	OLFM2
GHT09_004031	-3.62228	1.97201	118.565	1.42253e-27	1.31797e-26	2.91561	3.03996	-0.83081	-0.0731063	hypothetical protein	0
GHT09_004032	-2.70307	0.938647	39.3248	3.62406e-10	1.59989e-09	1.9102	1.71014	-0.405289	-0.671073	hypothetical protein	0
GHT09_004033	-3.51682	2.91025	204.229	3.22028e-46	4.96667e-45	3.76383	4.0244	0.698669	0.419699	hypothetical protein	0
GHT09_004042	-3.50572	1.1008	63.1402	1.97374e-15	1.13569e-14	1.87037	2.26893	-1.10229	-0.827436	hypothetical protein	0
GHT09_004044	-1.0524	4.32408	58.1195	2.51953e-14	1.37874e-13	4.68724	4.88167	3.75324	3.73731	sphingosine 1-phosphate receptor 2	S1PR2
GHT09_004049	-3.99454	1.79491	117.251	2.753e-27	2.52448e-26	2.81429	2.84656	-0.83081	-0.671073	hypothetical protein	0
GHT09_004056	1.52521	5.65527	175.958	4.47075e-40	5.96071e-39	4.70433	4.65229	6.22902	6.16815	cAMP-specific 3' 5'-cyclic phosphodiesterase 4A	PDE4A
GHT09_004059	9.7659	2.46916	211.434	9.84785e-48	1.57558e-46	-2.5025	-2.5025	3.01511	3.47809	sphingosine 1-phosphate receptor 5	S1PR5
GHT09_004061	1.32089	4.3	82.8308	9.32814e-20	6.43332e-19	3.44929	3.47428	4.78976	4.75211	cyclin-dependent kinase 4 inhibitor D	CDKN2D
GHT09_004063	2.20567	8.07503	607.82	3.10594e-133	1.73049e-131	6.62252	6.53498	8.76201	8.80362	hypothetical protein	0
GHT09_004073	1.13085	5.12635	86.9365	1.1745e-20	8.43987e-20	4.27168	4.5732	5.44215	5.6488	kinetochore protein Spc24	SPC24
GHT09_004074	1.53059	7.15079	268.467	3.80062e-60	7.80588e-59	6.14976	6.21253	7.66246	7.7542	KN motif and ankyrin repeat domain-containing protein 2	KANK2
GHT09_004075	1.30411	1.04479	10.6873	0.00107959	0.00283683	0.381049	0.14419	1.47521	1.42887	hypothetical protein	0
GHT09_004078	-1.38185	4.03536	84.5535	3.90955e-20	2.74697e-19	4.60469	4.61633	3.29573	3.20286	hypothetical protein	0
GHT09_004079	-1.37418	4.89523	121.695	2.94916e-28	2.7928e-27	5.30297	5.59582	4.14007	4.0498	ras-related protein Rab-3D	RAB3D
GHT09_004084	1.24246	2.48801	26.0545	3.33396e-07	1.20526e-06	1.69906	1.71014	2.81217	2.97327	coiled-coil domain-containing protein 151	ODAD3
GHT09_004087	1.47494	3.37952	60.8079	6.44e-15	3.61748e-14	2.22643	2.59881	3.90025	3.84485	zinc finger protein 653	ZNF653
GHT09_004091	-4.40169	0.836758	65.9182	4.82984e-16	2.85828e-15	1.9102	1.84056	-1.43697	-1.7108	tartrate-resistant acid phosphatase type 5	ACP5
GHT09_004093	1.96727	0.0162563	9.35503	0.00222518	0.00565341	-0.771375	-1.38521	0.516152	0.487649	hypothetical protein	0
GHT09_004097	-1.84176	6.14987	294.094	1.07996e-65	2.43454e-64	6.78932	6.84572	4.94687	5.01069	hypothetical protein	0
GHT09_004098	-1.79421	4.87265	197.982	7.31941e-45	1.09281e-43	5.49854	5.59889	3.58953	3.89576	hypothetical protein	0
GHT09_004099	1.13364	5.30922	92.3136	7.7989e-22	5.86244e-21	4.56157	4.66408	5.74939	5.7352	protein Asterix	WDR83OS
GHT09_004102	1.12873	3.606	42.4943	7.17076e-11	3.30769e-10	2.87593	2.92706	4.01657	4.00992	hypothetical protein	0
GHT09_004113	2.79955	0.419782	22.0421	2.67588e-06	9.01416e-06	-1.04838	-1.38521	1.0063	1.03369	hypothetical protein	0
GHT09_004118	1.34088	8.76002	252.459	1.11491e-56	2.14822e-55	7.98692	7.88295	9.26682	9.28537	calreticulin	CALR
GHT09_004119	1.18027	7.23891	167.521	3.05751e-38	3.90188e-37	6.52648	6.52046	7.60287	7.79207	UV excision repair protein RAD23 A	0
GHT09_004122	3.15073	7.34159	977.972	3.41689e-212	3.99136e-210	4.98638	5.06627	8.25863	8.08037	nuclear factor 1 X-type	NFIX
GHT09_004124	1.27164	8.73264	227.815	2.45206e-51	4.25776e-50	7.91594	7.99864	9.18744	9.26872	nucleus accumbens-associated protein 1	NACC1
GHT09_004125	1.27189	1.91758	18.6699	1.55784e-05	4.92883e-05	0.68646	1.46259	2.26465	2.3808	syntaxin-10	STX10
GHT09_004126	1.54861	7.70538	303.502	2.13526e-67	4.95473e-66	6.80526	6.64021	8.09527	8.42605	immediate early response 2 protein	IER2
GHT09_004127	1.46482	0.398161	8.07233	0.00449684	0.010972	-0.339066	-0.530361	0.698669	0.890429	hypothetical protein	0
GHT09_004131	-5.07088	-1.59363	6.78872	0.00917687	0.0214977	-1.04838	-0.763173	-2.5025	-2.5025	nanos 3	0
GHT09_004138	-1.00536	4.18069	49.7289	1.79308e-12	8.99781e-12	4.46459	4.77698	3.60104	3.65843	hypothetical protein	0
GHT09_004141	1.0414	5.78953	89.0505	4.04272e-21	2.95886e-20	5.19021	5.13143	6.1292	6.26088	hypothetical protein	0
GHT09_004143	1.11171	6.06026	107.829	3.14876e-25	2.6717e-24	5.3759	5.39467	6.40679	6.57093	histone chaperone ASF1B	ASF1B
GHT09_004144	1.81269	6.91318	345.306	9.21034e-77	2.53488e-75	5.6176	5.82842	7.5541	7.51873	hypothetical protein	0
GHT09_004146	-1.49535	5.82315	184.162	7.36151e-42	1.02191e-40	6.49245	6.31892	4.82945	4.99033	hypothetical protein	0
GHT09_004148	2.09455	0.106689	11.2355	0.000803207	0.00214707	-1.04838	-1.04092	0.610295	0.614642	hypothetical protein	0
GHT09_004150	-1.19555	7.24863	174.456	9.48376e-40	1.25387e-38	7.74753	7.72024	6.59125	6.49041	dnaJ subfamily B member 1	0
GHT09_004158	-1.36789	1.48671	18.225	1.96727e-05	6.17199e-05	2.09436	2.03471	0.781941	0.786352	hypothetical protein	0
GHT09_004159	-2.45204	1.56313	52.9371	3.50545e-13	1.82221e-12	2.28819	2.52314	0.307153	0.0216203	hypothetical protein	0
GHT09_004160	-1.06228	3.8098	45.2521	1.75499e-11	8.35591e-11	4.16871	4.38654	3.36488	3.11965	hypothetical protein	0
GHT09_004171	-5.57257	-1.32975	10.1857	0.00141639	0.00367323	-0.771375	-0.329951	-2.5025	-2.5025	hypothetical protein	0
GHT09_004185	-3.87457	-0.974828	11.0711	0.000877613	0.00233443	-0.16343	-0.154015	-1.87352	-2.5025	leucine-rich repeat and death domain-containing protein 1	LRRD1
GHT09_004193	-1.31154	9.72144	248.176	9.44661e-56	1.78669e-54	10.2647	10.2045	8.85268	8.99014	40S ribosomal protein S20	RPS20
GHT09_004195	-3.48852	3.47258	282.622	4.84801e-63	1.04367e-61	4.18504	4.67578	0.698669	1.28352	zinc finger protein PLAG1	PLAG1
GHT09_004196	-1.50663	3.87196	91.0773	1.45464e-21	1.08316e-20	4.49764	4.47622	2.92638	3.05393	coiled-coil-helix-coiled-coil-helix domain-containing protein 7	CHCHD7
GHT09_004197	-4.03921	3.15045	277.762	3.69513e-62	7.80763e-61	3.95685	4.37224	0.190081	0.419699	epidermal retinol dehydrogenase 2	SDR16C5
GHT09_004208	4.10086	-0.334445	16.7515	4.26907e-05	0.000129623	-2.5025	-1.83829	0.781941	-0.174493	PDZ domain-containing protein GIPC2	GIPC2
GHT09_004209	-4.85557	-1.69345	5.70784	0.0168938	0.0380145	-1.04838	-1.04092	-2.5025	-2.5025	hypothetical protein	0
GHT09_004211	-1.44509	0.257074	8.21733	0.00415133	0.0101652	0.591662	1.02414	-0.602418	-0.283546	UPF0583 protein C15orf59-like	INSYN1
GHT09_004216	9.59896	6.43236	1820.41	0	0	-1.39151	-1.38521	7.35349	7.43031	immunoglobulin superfamily containing leucine-rich repeat protein	ISLR
GHT09_004217	-1.6217	5.0855	176.246	3.87035e-40	5.17364e-39	5.76064	5.66493	4.15577	4.05541	hypothetical protein	0
GHT09_004226	-1.22683	2.58532	29.9126	4.54594e-08	1.74888e-07	3.08178	3.1614	1.61802	2.12751	hypothetical protein	0
GHT09_004229	-12.3847	7.03091	2682.49	0	0	8.05846	8.05178	-1.87352	-2.5025	cytochrome P450 1A1	CYP1A1
GHT09_004230	-5.07077	-1.59364	6.78835	0.00917875	0.0214977	-0.771375	-1.04092	-2.5025	-2.5025	hypothetical protein	0
GHT09_004237	-1.50452	4.17141	106.52	6.08242e-25	5.11237e-24	4.82385	4.73846	3.20812	3.35615	hypothetical protein	0
GHT09_004238	-1.5521	6.85992	262.713	6.69885e-59	1.35287e-57	7.43838	7.46196	5.81264	5.97601	cytochrome c oxidase subunit 5A mitochondrial	COX5A
GHT09_004240	-1.80502	5.09722	215.212	1.33011e-48	2.17894e-47	5.75245	5.79127	3.93705	4.00992	secretory carrier-associated membrane protein 5	SCAMP5
GHT09_004241	-1.41641	4.53215	112.709	2.70299e-26	2.39426e-25	5.1821	5.03937	3.49398	3.85775	phosphopantothenoylcysteine decarboxylase	PPCDC
GHT09_004243	-7.78083	0.291522	60.5584	7.30892e-15	4.09327e-14	1.55574	1.16357	-2.5025	-2.5025	hypothetical protein	0
GHT09_004251	1.23084	1.62315	14.5266	0.000138396	0.000401366	0.381049	1.22854	1.82852	2.14865	hypothetical protein	0
GHT09_004254	1.87478	5.36161	234.089	1.06891e-52	1.90927e-51	4.04893	4.17209	5.99603	5.95816	type I inositol 3 4-bisphosphate 4-phosphatase	INPP4A
GHT09_004257	-2.75014	3.16707	171.083	5.13572e-39	6.68684e-38	3.97574	4.13867	1.5244	1.28352	alpha-1 3-mannosyl-glycoprotein 4-beta-N-acetylglucosaminyltransferase A	MGAT4A
GHT09_004259	-1.58366	1.04659	17.4896	2.89477e-05	8.92527e-05	1.69906	1.66392	0.190081	0.273371	testis-specific 10 protein	TSGA10
GHT09_004260	-5.83023	-1.17723	12.5564	0.000395281	0.00109346	-0.00687362	-0.763173	-2.5025	-2.5025	hypothetical protein	0
GHT09_004261	-1.88224	4.82493	211.392	8.97146e-48	1.4376e-46	5.54988	5.4938	3.65726	3.65104	lipoyltransferase 1 mitochondrial	LIPT1
GHT09_004273	-1.10339	5.88618	104.545	1.64436e-24	1.36868e-23	6.34404	6.35936	5.21753	5.28105	serine/threonine-protein kinase 17A	STK17A
GHT09_004279	1.34247	5.49584	133.547	7.65936e-31	7.81871e-30	4.74345	4.55432	5.94951	6.024	coiled-coil domain-containing protein 77	CCDC77
GHT09_004281	1.82592	6.61917	322.534	7.65437e-72	1.90056e-70	5.4214	5.41923	7.28734	7.19778	hypothetical protein	0
GHT09_004282	1.77836	9.24394	437.439	1.247e-96	4.65282e-95	8.00025	8.18152	9.88764	9.8552	serine/threonine-protein kinase WNK1	WNK1
GHT09_004283	1.16164	3.06405	32.8053	1.02574e-08	4.12119e-08	2.37614	2.29949	3.57793	3.38316	hypothetical protein	0
GHT09_004286	2.06969	5.54544	292.491	2.39924e-65	5.36152e-64	3.9851	4.28329	6.24745	6.15645	hypothetical protein	0
GHT09_004289	-1.21383	8.22545	204.659	2.59718e-46	4.02074e-45	8.72372	8.70187	7.48511	7.51364	tetraspanin-3	TSPAN3
GHT09_004292	-4.41221	5.51872	936.077	2.71196e-203	2.85924e-201	6.34222	6.65061	2.07956	2.19003	leucine-rich repeat and immunoglobulin domain-containing nogo receptor-interacting protein 1-like	LINGO1
GHT09_004294	-1.79948	5.59703	245.824	3.0551e-55	5.70479e-54	6.22867	6.29636	4.39938	4.52841	sorting nexin-33	SNX33
GHT09_004295	-1.36887	4.69954	113.005	2.32934e-26	2.06864e-25	5.38299	5.13143	3.79393	3.98663	U3 small nucleolar ribonucleoprotein IMP3	0
GHT09_004301	-1.95189	2.90059	84.1214	4.86222e-20	3.40008e-19	3.74192	3.53974	1.37148	1.97013	hypothetical protein	0
GHT09_004303	3.64385	0.505027	31.63	1.87734e-08	7.42236e-08	-1.84261	-1.38521	0.610295	1.46303	hypothetical protein	0
GHT09_004311	-1.10473	4.08416	56.5548	5.57635e-14	3.00037e-13	4.42389	4.69889	3.66825	3.30056	zinc finger protein 283	ZNF283
GHT09_004312	2.84374	1.58064	52.9896	3.41304e-13	1.77512e-12	-0.00687362	-0.763173	1.86717	2.45056	ly6/PLAUR domain-containing protein 5	0
GHT09_004314	5.33815	5.44755	954.342	3.56688e-207	3.9854e-205	1.27983	0.949025	6.28183	6.41388	intermediate conductance calcium-activated potassium channel protein 4	KCNN4
GHT09_004316	-5.25799	-1.50026	7.89615	0.00495636	0.0119978	-0.539088	-1.04092	-2.5025	-2.5025	hypothetical protein	0
GHT09_004320	-1.31026	6.21885	158.953	2.23726e-36	2.70563e-35	6.80526	6.6843	5.49555	5.38715	immunity-related GTPase family Q protein	IRGQ
GHT09_004323	-1.98998	2.05491	51.6414	6.77517e-13	3.47099e-12	2.72778	2.88737	1.20041	0.674178	zinc finger protein 575	ZNF575
GHT09_004325	-1.38316	4.87973	122.657	1.81878e-28	1.73353e-27	5.46216	5.42617	4.06724	4.07211	pleckstrin domain family B member 3	0
GHT09_004328	-2.61002	1.0518	40.7244	1.77146e-10	7.98321e-10	2.12852	1.66392	-0.405289	-0.401522	ly6/PLAUR domain-containing protein 4	0
GHT09_004331	-1.71829	7.12811	338.673	2.49412e-75	6.69406e-74	7.71978	7.7952	5.94048	6.12879	prenylated Rab acceptor protein 1	RABAC1
GHT09_004333	-1.26478	5.75335	132.158	1.53831e-30	1.56256e-29	6.31466	6.2285	4.8917	5.10835	zinc finger protein 574	ZNF574
GHT09_004336	-1.78019	5.08367	208.527	3.7569e-47	5.94139e-46	5.67653	5.82317	4.07552	3.902	DNA-binding death effector domain-containing protein 2	DEDD2
GHT09_004337	-1.46103	5.28802	154.615	1.9681e-35	2.30816e-34	5.81935	5.91977	4.3319	4.48336	zinc finger protein 526	ZNF526
GHT09_004340	2.31413	5.28394	324.784	2.49802e-72	6.27067e-71	3.79608	3.53974	5.88976	6.04529	platelet-activating factor acetylhydrolase IB subunit gamma	PAFAH1B3
GHT09_004345	-3.9253	6.30964	1040.24	5.26207e-224	7.16443e-222	7.07099	7.41039	3.32379	3.36521	hypothetical protein	0
GHT09_004362	2.10403	6.72563	427.569	1.66582e-94	5.99781e-93	5.26891	5.34059	7.43212	7.37755	acetoacetyl-CoA synthetase	AACS
GHT09_004372	-4.85546	-1.69346	5.70752	0.0168968	0.0380145	-0.771375	-1.38521	-2.5025	-2.5025	hypothetical protein	0
GHT09_004392	1.95132	5.9353	292.983	1.87851e-65	4.2116e-64	4.72681	4.52875	6.65614	6.49557	cyclin-dependent kinase 2-associated protein 1	CDK2AP1
GHT09_004394	1.74419	6.02472	245.897	2.9464e-55	5.50683e-54	4.84455	4.92152	6.57091	6.66839	membrane-associated phosphatidylinositol transfer protein 2	PITPNM2
GHT09_004397	3.79504	6.68814	1054.74	2.12348e-227	2.94978e-225	3.54094	3.98734	7.5067	7.60873	ATP-binding cassette sub-family B member 9	ABCB9
GHT09_004402	-6.13963	1.561	139.594	3.68239e-32	3.90037e-31	2.28819	2.98461	-1.87352	-2.05301	hydroxycarboxylic acid receptor 2	HCAR2
GHT09_004403	2.2004	6.03857	370.234	3.8276e-82	1.13388e-80	4.62876	4.42862	6.71692	6.73193	hypothetical protein	0
GHT09_004409	1.10765	5.43216	91.5879	1.12444e-21	8.41548e-21	4.75989	4.74957	5.74421	5.95366	diablo mitochondrial-like	0
GHT09_004410	5.53504	-1.11374	9.15795	0.00247793	0.00625536	-2.5025	-2.5025	-0.83081	-0.401522	hypothetical protein	0
GHT09_004414	1.20271	3.64785	48.8445	2.81295e-12	1.39555e-11	3.02849	2.73919	4.10007	4.05541	B-cell CLL/lymphoma 7 protein family member A	BCL7A
GHT09_004415	6.38682	-0.511219	18.5071	1.69911e-05	5.3593e-05	-2.5025	-2.5025	-0.83081	0.552542	WD repeat-containing protein 66	WDR66
GHT09_004429	3.49267	1.59446	68.2749	1.46422e-16	8.88253e-16	-1.04838	-0.530361	2.23541	2.34461	hypothetical protein	0
GHT09_004430	7.79013	3.79127	479.364	1.18231e-105	4.94049e-104	-2.5025	-1.38521	4.61343	4.7065	P2X purinoceptor 7	P2RX7
GHT09_004440	1.21151	4.93682	92.6344	6.63415e-22	5.00887e-21	4.06667	4.29092	5.39664	5.37823	hypothetical protein	0
GHT09_004446	1.09535	5.06976	80.3389	3.28323e-19	2.21893e-18	4.48451	4.30605	5.42282	5.54299	hypothetical protein	0
GHT09_004449	1.07312	3.87683	45.0251	1.97044e-11	9.36004e-11	3.16645	3.25792	4.28271	4.26355	DNA oxidative demethylase ALKBH1	ALKBH1
GHT09_004452	1.67538	0.65788	12.3476	0.000442035	0.00121641	-1.04838	0.14419	0.860668	1.28352	hypothetical protein	0
GHT09_004455	1.58019	3.36971	68.1917	1.52723e-16	9.24569e-16	2.34742	2.32942	4.04213	3.74427	sterile alpha motif domain-containing protein 15	SAMD15
GHT09_004462	1.08614	5.29133	84.6996	3.6316e-20	2.55517e-19	4.61074	4.64636	5.70474	5.71408	CLOCK-interacting pacemaker	CIPC
GHT09_004463	1.26538	7.70226	206.902	8.46404e-47	1.33037e-45	6.92553	6.93237	8.14576	8.23788	hypothetical protein	0
GHT09_004467	-1.64163	5.20871	186.93	1.84259e-42	2.577e-41	5.69089	5.97525	4.31102	4.11571	protein angel 1	0
GHT09_004472	3.12279	4.30045	329.562	2.3185e-73	5.95081e-72	1.65285	2.26893	5.00868	5.10565	transforming growth factor beta-3	TGFB3
GHT09_004473	3.68514	2.18289	108.38	2.38627e-25	2.04329e-24	-0.00687362	-1.04092	2.96253	2.88783	hypothetical protein	0
GHT09_004474	-5.42388	-1.4125	9.02973	0.00265784	0.00667113	-0.771375	-0.530361	-2.5025	-2.5025	basic leucine zipper transcriptional factor ATF-like	BATF
GHT09_004475	3.42565	4.79322	471.029	7.34233e-104	2.95982e-102	2.19453	2.23771	5.56479	5.6207	jun dimerization protein 2	JDP2
GHT09_004476	1.24899	4.11728	68.1691	1.54485e-16	9.34411e-16	3.30735	3.34839	4.45118	4.65202	proto-oncogene c-Fos	0
GHT09_004484	-1.13999	1.64762	14.3281	0.000153772	0.000444266	2.02349	2.26893	1.0063	1.12186	placenta growth factor	PGF
GHT09_004486	-2.34113	-0.45293	9.74639	0.00179799	0.00460507	-0.00687362	0.500452	-1.10229	-1.7108	hypothetical protein	0
GHT09_004487	-3.34488	3.5238	274.045	2.35679e-61	4.91411e-60	4.49764	4.46951	1.47521	1.03369	ribosomal protein S6 kinase 1-like	RPS6KL1
GHT09_004498	-1.6989	0.148426	9.98737	0.00157732	0.00406519	1.15278	0.272969	-0.231886	-1.00283	hypothetical protein	0
GHT09_004502	-1.21295	7.52804	188.667	8.65847e-43	1.22092e-41	8.15071	7.87156	6.73532	6.86962	TGF-beta receptor type-2	TGFBR2
GHT09_004503	1.61897	5.00789	161.123	7.54403e-37	9.24852e-36	3.92804	3.97792	5.56479	5.55887	mothers against decapentaplegic 6	0
GHT09_004506	2.25908	7.0628	529.824	1.68663e-116	8.06406e-115	5.62361	5.40173	7.72758	7.81374	mothers against decapentaplegic 3	0
GHT09_004513	7.4259	6.94565	2087.04	0	0	0.77541	0.500452	7.93395	7.88752	5'-nucleotidase	NT5E
GHT09_004516	2.01229	4.69498	207.586	6.01253e-47	9.46491e-46	3.21496	3.43352	5.33937	5.30714	propionyl-CoA carboxylase alpha chain mitochondrial	PCCA
GHT09_004517	1.34897	5.32697	128.434	9.98496e-30	9.90259e-29	4.43075	4.52229	5.80271	5.83477	zinc finger protein ZIC 2	ZIC2
GHT09_004533	1.45042	8.48689	290.289	7.18582e-65	1.59884e-63	7.58708	7.57791	8.99308	9.06955	muscleblind protein 2	MBNL2
GHT09_004535	-7.92616	0.418344	67.1653	2.56815e-16	1.53977e-15	1.60511	1.40754	-2.5025	-2.5025	hypothetical protein	0
GHT09_004536	-7.34103	4.44073	857.94	1.14e-186	1.06051e-184	5.41449	5.62023	-0.602418	-1.7108	protein FAM83B	FAM83B
GHT09_004545	-2.6189	2.35006	96.9294	8.12405e-23	6.34583e-22	3.39417	3.03996	1.31668	0.110509	hypothetical protein	0
GHT09_004561	-2.69426	4.94643	402.714	3.78157e-89	1.25194e-87	5.69944	5.88241	2.98027	3.22294	fructose-bisphosphate aldolase B	ALDOB
GHT09_004564	-2.95716	1.12822	51.8205	6.18534e-13	3.17593e-12	1.82941	2.23771	-1.10229	-0.283546	bile acid-CoA:amino acid N-acyltransferase-like	BAAT
GHT09_004571	-2.48988	8.95703	807.547	6.24023e-176	5.4132e-174	9.7222	9.72866	7.28823	7.18632	UDP-glucose 6-dehydrogenase	UGDH
GHT09_004573	-1.50614	2.69531	46.5532	9.14835e-12	4.42543e-11	2.89591	3.65057	1.94149	1.79347	beta-klotho	KLB
GHT09_004616	-3.40089	0.0304429	26.1744	3.13327e-07	1.1351e-06	0.859193	1.02414	-1.10229	-2.05301	hypothetical protein	0
GHT09_004617	1.24805	6.17305	139.276	4.63321e-32	4.88733e-31	5.52123	5.2729	6.49118	6.78015	WAS protein family 1	0
GHT09_004620	-1.2428	5.7812	128.479	9.7634e-30	9.68754e-29	6.19278	6.38631	4.99566	5.10294	hypothetical protein	0
GHT09_004621	2.79848	4.62972	335.565	1.16989e-74	3.0915e-73	2.56265	2.64713	5.43252	5.31183	cat eye syndrome critical region protein 2	CECR2
GHT09_004634	-5.24388	5.65248	1152.98	2.86386e-249	4.63607e-247	6.58456	6.74245	1.42428	1.56091	hypothetical protein	0
GHT09_004636	1.70942	2.23268	38.6756	5.05235e-10	2.21332e-09	1.3394	0.869781	2.98027	2.54926	hypothetical protein	0
GHT09_004637	-1.90076	0.773362	19.8932	8.21065e-06	2.65413e-05	1.55574	1.40754	-0.405289	-0.0731063	dyslexia-associated protein KIAA0319	KIAA0319
GHT09_004641	-2.63336	0.776457	33.8518	5.99145e-09	2.44401e-08	1.3966	1.84056	-0.83081	-0.530011	hypothetical protein	0
GHT09_004642	14.6969	7.21844	2584.93	0	0	-2.5025	-2.5025	8.18787	8.2023	cytidine monophosphate-N-acetylneuraminic acid hydroxylase	CMAH
GHT09_004645	-6.93246	-0.40782	30.7042	3.02349e-08	1.17772e-07	0.262963	0.869781	-2.5025	-2.5025	voltage-dependent L-type calcium channel subunit beta-2	CACNB2
GHT09_004650	1.63996	1.641	24.2274	8.59387e-07	3.00939e-06	0.591662	0.602018	1.97727	2.23025	hypothetical protein	0
GHT09_004651	-1.06895	3.49987	38.9425	4.40729e-10	1.93527e-09	3.89864	4.05158	2.90797	2.93727	protein tyrosine phosphatase type IVA 1	PTP4A1
GHT09_004658	4.54595	3.63401	331.651	8.20125e-74	2.1316e-72	-0.00687362	0.272969	4.55544	4.3754	rho GTPase-activating protein 20	ARHGAP20
GHT09_004666	1.54942	5.84825	189.944	4.07823e-43	5.80237e-42	4.90986	4.79853	6.44562	6.35484	serine/threonine-protein kinase SIK2	SIK2
GHT09_004672	2.81564	0.422988	22.3412	2.29011e-06	7.7553e-06	-1.04838	-1.38521	1.31668	0.786352	hypothetical protein	0
GHT09_004673	1.1474	4.77717	78.8783	6.8666e-19	4.57602e-18	4.03098	4.10446	5.28332	5.13772	dixin	DIXDC1
GHT09_004680	1.93454	4.24013	156.588	7.32285e-36	8.73263e-35	2.85567	3.0033	4.81963	4.8618	beta beta-carotene 9' 10'-oxygenase	BCO2
GHT09_004682	-10.7322	3.11308	432.896	1.18616e-95	4.36249e-94	4.38202	4.08705	-2.5025	-2.5025	placenta-expressed transcript 1 protein	PLET1
GHT09_004683	-1.45526	1.57746	21.7014	3.199e-06	1.07149e-05	1.69906	2.5488	0.860668	0.786352	hypothetical protein	0
GHT09_004686	-1.26056	6.75077	171.677	7.00446e-39	9.06831e-38	7.01843	7.46533	6.04742	5.95666	short-chain dehydrogenase/reductase 3	DHRS3
GHT09_004691	1.2139	1.16376	10.2949	0.00133501	0.00348039	-0.00687362	0.785929	1.66265	1.46303	cyclin-A2	CCNA2
GHT09_004695	-5.07077	-1.59364	6.78835	0.00917875	0.0214977	-0.771375	-1.04092	-2.5025	-2.5025	hairy/enhancer-of-split related with YRPW motif protein-like	HEYL
GHT09_004707	-6.66268	3.2708	429.779	5.56777e-95	2.02598e-93	4.19313	4.54797	-1.87352	-1.20254	hypothetical protein	0
GHT09_004709	-7.01358	2.40541	257.403	9.46748e-58	1.86617e-56	3.54094	3.52688	-1.87352	-2.05301	zinc finger protein ZFP69	ZFP69
GHT09_004712	1.16983	5.36133	99.4713	2.116e-23	1.69009e-22	4.66994	4.61024	5.78263	5.82495	nuclear transcription factor Y subunit gamma	NFYC
GHT09_004718	1.1403	1.47369	11.4469	0.000716787	0.0019286	0.381049	1.09554	1.61802	1.99369	hypothetical protein	0
GHT09_004719	2.11857	5.59649	308.559	8.03446e-69	1.89645e-67	4.1522	4.15548	6.33967	6.18616	hypothetical protein	0
GHT09_004746	-4.55123	4.30183	593.323	3.97983e-130	2.15887e-128	5.27655	5.38044	0.698669	1.03369	ensconsin	MAP7
GHT09_004748	1.39766	4.50265	101.168	9.00364e-24	7.28763e-23	3.73085	3.47428	4.93328	5.04492	hypothetical protein	0
GHT09_004749	4.69168	1.39703	77.4494	1.41349e-18	9.31406e-18	-1.04838	-2.5025	2.17507	2.12751	hypothetical protein	0
GHT09_004750	4.85869	-1.50434	5.25456	0.0218944	0.0484372	-2.5025	-2.5025	-1.10229	-1.00283	hypothetical protein	0
GHT09_004754	1.36743	6.04469	158.52	2.78029e-36	3.35446e-35	5.17394	5.20187	6.53235	6.56897	chromatin assembly factor 1 subunit B	CHAF1B
GHT09_004756	1.22363	0.53577	6.54639	0.0105132	0.0243897	-0.00687362	-0.329951	0.781941	0.987501	hypothetical protein	0
GHT09_004761	1.34197	5.08199	117.749	2.14334e-27	1.97512e-26	4.13549	4.32845	5.5589	5.57848	hypothetical protein	0
GHT09_004763	-2.75796	0.207288	23.3457	1.35832e-06	4.67846e-06	1.2177	0.869781	-0.83081	-1.4344	protein ripply3	RIPPLY3
GHT09_004766	1.01962	6.58669	107.273	4.16552e-25	3.52134e-24	6.01469	5.94173	6.97204	7.01917	Down syndrome critical region protein 3	VPS26C
GHT09_004767	1.472	7.2709	256.394	1.56614e-57	3.07529e-56	6.36389	6.32821	7.87828	7.75377	dual specificity tyrosine-phosphorylation-regulated kinase 1A	DYRK1A
GHT09_004769	-3.40351	-1.25223	6.88367	0.00870187	0.0204881	-1.04838	-0.154015	-2.5025	-2.05301	ATP-sensitive inward rectifier potassium channel 15	KCNJ15
GHT09_004777	1.38602	4.48733	98.883	2.84589e-23	2.25553e-22	3.54094	3.66238	4.99129	4.96374	hypothetical protein	0
GHT09_004796	3.24275	-0.920409	7.1244	0.00760715	0.0180241	-2.5025	-1.83829	-0.405289	-0.401522	hypothetical protein	0
GHT09_004801	1.34612	4.61371	99.3928	2.20134e-23	1.75689e-22	3.85848	3.65057	5.02587	5.15088	rab GTPase-binding effector protein 2	RABEP2
GHT09_004802	6.00085	-0.805971	13.4068	0.000251022	0.00070841	-2.5025	-2.5025	-0.231886	-0.174493	hypothetical protein	0
GHT09_004810	1.07892	3.63053	39.6137	3.12625e-10	1.3828e-09	3.02849	2.88737	3.94611	4.08313	SAGA-associated factor 29-like	SGF29
GHT09_004812	-5.70695	-1.25151	11.3598	0.000751191	0.00201232	-0.00687362	-1.04092	-2.5025	-2.5025	sulfotransferase 1A1-like	SULT1A1
GHT09_004814	-9.70543	2.08663	225.217	8.97724e-51	1.53803e-49	3.23077	3.22646	-2.5025	-2.5025	sulfotransferase 1A1-like	SULT1A1
GHT09_004816	2.24629	4.9119	270.769	1.2064e-60	2.4902e-59	3.29235	3.41968	5.66964	5.50455	beta-sarcoglycan	SGCB
GHT09_004817	-1.41094	1.0016	13.5973	0.000226801	0.000644032	1.55574	1.61616	0.781941	-0.174493	leucine-rich repeat-containing protein 66	LRRC66
GHT09_004818	1.37976	6.49568	185.586	3.60972e-42	5.03133e-41	5.53721	5.72527	7.10127	6.91967	DCN1 protein 4	DCUN1D4
GHT09_004826	-1.09371	7.44095	151.954	1.2935e-34	1.48482e-33	7.80544	7.97458	6.9973	6.5865	zinc finger Ran-binding domain-containing protein 2	ZRANB2
GHT09_004828	-3.87487	-0.974796	11.0731	0.000876649	0.00233308	-0.771375	0.272969	-1.87352	-2.5025	prostaglandin E2 receptor EP3 subtype	PTGER3
GHT09_004830	-2.77891	4.29874	322.189	9.08735e-72	2.24822e-70	5.09837	5.24569	2.20555	2.58071	hypothetical protein	0
GHT09_004835	3.50775	2.90528	163.905	1.87162e-37	2.32639e-36	0.591662	0.00277842	3.57793	3.70912	protein turtle B	0
GHT09_004843	1.56035	2.25703	33.6531	6.63529e-09	2.69915e-08	1.27983	1.22854	2.87041	2.64164	hypothetical protein	0
GHT09_004863	-7.18409	-0.208571	37.5981	8.77185e-10	3.77202e-09	0.77541	0.869781	-2.5025	-2.5025	ELAV protein 2	ELAVL2
GHT09_004867	-1.36947	2.43137	33.3575	7.72318e-09	3.12684e-08	3.02849	3.0033	2.07956	1.32125	hypothetical protein	0
GHT09_004869	2.17581	-0.598475	5.97877	0.0144833	0.0330002	-1.84261	-1.38521	-0.0771072	-0.174493	hypothetical protein	0
GHT09_004870	1.34019	7.04554	204.001	3.60802e-46	5.56052e-45	6.26752	6.16145	7.49749	7.60587	extracellular serine/threonine protein kinase FAM20C	FAM20C
GHT09_004871	2.40318	2.00543	56.501	5.73083e-14	3.07946e-13	0.134344	0.602018	2.85126	2.43343	hypothetical protein	0
GHT09_004873	2.34233	6.73914	516.111	1.48872e-113	6.92457e-112	5.07228	5.16915	7.41592	7.49777	hypothetical protein	0
GHT09_004874	-2.51092	0.969689	36.1198	1.87106e-09	7.89392e-09	1.65285	1.96015	-0.83081	-0.174493	hypothetical protein	0
GHT09_004875	-1.27685	1.13788	12.5182	0.000403442	0.00111452	1.2177	2.03471	0.781941	0.273371	hypothetical protein	0
GHT09_004878	-2.31128	2.81703	105.578	9.7744e-25	8.17944e-24	3.50237	3.76449	1.25972	1.4964	arf-GAP with dual PH domain-containing protein 1	ADAP1
GHT09_004879	1.19642	2.48027	24.2174	8.63832e-07	3.02444e-06	1.65285	1.79838	2.68813	3.01991	cytochrome c oxidase assembly protein COX19	COX19
GHT09_004883	-1.03975	0.500383	5.31474	0.0211507	0.0469283	0.591662	1.22854	-0.405289	0.273371	hypothetical protein	0
GHT09_004885	5.53504	-1.11374	9.15795	0.00247793	0.00625536	-2.5025	-2.5025	-0.83081	-0.401522	G-protein coupled estrogen receptor 1	GPER1
GHT09_004894	-2.4068	-0.210428	12.8712	0.000334058	0.000931492	0.68646	0.391189	-0.83081	-1.7108	zinc finger and SCAN domain-containing protein 30	ZSCAN30
GHT09_004895	-5.57257	-1.32975	10.1857	0.00141639	0.00367323	-0.771375	-0.329951	-2.5025	-2.5025	hypothetical protein	0
GHT09_004896	2.52607	3.39547	146.758	1.01201e-33	1.12161e-32	1.27983	1.88153	4.17129	3.98074	hypothetical protein	0
GHT09_004899	1.64798	1.83321	27.7032	1.42136e-07	5.28137e-07	0.262963	1.16357	2.42868	2.24995	zinc finger protein 396	ZNF396
GHT09_004900	1.26327	3.03356	37.5177	9.14086e-10	3.92496e-09	2.19453	2.26893	3.41792	3.50293	INO80 complex subunit C	INO80C
GHT09_004911	-1.16405	9.03396	194.646	3.88139e-44	5.68358e-43	9.49816	9.50988	8.41355	8.26536	V-type proton ATPase catalytic subunit A	ATP6V1A
GHT09_004912	-1.0533	8.04041	152.584	5.44984e-35	6.30519e-34	8.50787	8.44638	7.41918	7.43031	N-alpha-acetyltransferase 50	NAA50
GHT09_004921	6.76261	-0.225736	25.071	5.54868e-07	1.96715e-06	-2.5025	-2.5025	0.0626637	0.674178	brother of CDO	BOC
GHT09_004922	-1.47452	4.30618	109.418	1.41494e-25	1.22329e-24	4.85989	4.95069	3.39164	3.48641	protein nepro-like	NEPRO
GHT09_004928	5.02101	-1.41736	6.00407	0.014277	0.0325846	-2.5025	-2.5025	-1.10229	-0.827436	adseverin	SCIN
GHT09_004932	-5.43298	3.28338	387.401	7.57715e-86	2.37106e-84	4.13549	4.5732	-0.602418	-0.671073	paraneoplastic antigen Ma1	PNMA1
GHT09_004935	-1.9194	1.71536	39.0139	4.24901e-10	1.86856e-09	2.77168	2.03471	0.610295	0.674178	hypothetical protein	0
GHT09_004937	-4.55764	3.30603	341.262	6.88085e-76	1.85891e-74	4.26401	4.44921	0.415434	-0.283546	hepatocyte nuclear factor 4-gamma	HNF4G
GHT09_004940	-1.13463	3.50449	43.8555	3.57885e-11	1.67794e-10	3.92804	4.07827	2.75149	2.98507	selenide water dikinase 1	SEPHS1
GHT09_004943	-5.70962	2.02762	183.324	1.11972e-41	1.55019e-40	3.13317	3.14466	-2.5025	-1.20254	proline dehydrogenase 1 mitochondrial-like	PRODH
GHT09_004946	-1.1027	5.77095	101.854	6.37384e-24	5.18764e-23	6.25983	6.21454	5.08034	5.1871	putative palmitoyltransferase ZDHHC8	0
GHT09_004949	-1.56968	4.81798	151.579	9.01939e-35	1.03708e-33	5.45208	5.41923	3.99055	3.77858	armadillo repeat protein deleted in velo-cardio-facial syndrome	ARVCF
GHT09_004954	3.60291	1.07189	48.4935	3.36355e-12	1.65989e-11	-1.39151	-1.04092	2.01218	1.56091	hypothetical protein	0
GHT09_004958	2.72058	3.20168	144.826	2.66697e-33	2.91961e-32	1.01344	1.46259	3.78387	3.96891	UPF0545 protein C22orf39-like	C22ORF39
GHT09_004962	-1.3971	8.3571	271.108	1.01871e-60	2.10914e-59	8.8203	8.97111	7.42647	7.56959	tricarboxylate transport protein mitochondrial	SLC25A1
GHT09_004971	-10.6644	5.27408	1344	1.46601e-289	2.89805e-287	6.34948	6.3245	-1.87352	-2.5025	hypothetical protein	0
GHT09_004972	-1.35504	6.17266	167.309	3.40083e-38	4.32392e-37	6.72657	6.70156	5.31861	5.40043	kelch protein 22-like	KLHL22
GHT09_004983	-2.63345	3.32869	175.402	5.90574e-40	7.86883e-39	4.11859	4.27563	1.94149	1.35802	apoptosis-inducing factor 3	AIFM3
GHT09_004994	7.59179	0.462475	47.9446	4.44851e-12	2.18222e-11	-2.5025	-2.5025	1.07395	1.28352	hypothetical protein	0
GHT09_004996	-1.52869	5.13017	160.634	9.63566e-37	1.17706e-35	5.64146	5.82053	4.1242	4.2828	stromal cell-derived factor 2 protein 1-like	SDF2L1
GHT09_004997	1.93299	0.721644	16.3785	5.19658e-05	0.000156767	-0.339066	-0.530361	1.5244	0.987501	hypothetical protein	0
GHT09_005018	-6.9476	4.22411	752.546	1.08483e-163	8.51259e-162	5.11976	5.47719	-1.43697	-0.827436	kielin/chordin protein-like	KCP
GHT09_005024	-1.75132	2.49309	54.7179	1.41784e-13	7.48378e-13	3.09911	3.2734	1.20041	1.68187	protein FAM71F1	FAM71F1
GHT09_005025	-2.20514	1.76755	50.8966	9.89655e-13	5.02502e-12	2.48565	2.64713	0.610295	0.419699	protein FAM71F2	FAM71F2
GHT09_005041	3.2776	7.61867	1088.22	2.05331e-189	1.97262e-187	4.82905	5.48052	8.47935	8.44567	hypothetical protein	0
GHT09_005043	-1.7756	5.74119	248.249	9.11036e-56	1.72468e-54	6.27707	6.51233	4.54951	4.69577	calcium-activated potassium channel subunit beta-4	KCNMB4
GHT09_005044	1.47573	0.277412	7.44386	0.00636803	0.0152144	-0.539088	-0.530361	1.07395	0.348389	hypothetical protein	0
GHT09_005045	1.12952	0.71964	6.50933	0.0107346	0.0248752	-0.339066	0.391189	0.93532	1.16401	hypothetical protein	0
GHT09_005047	8.04887	3.20249	334.897	1.63118e-74	4.28293e-73	-2.5025	-1.83829	4.16355	3.96891	hypothetical protein	0
GHT09_005054	6.98939	3.03273	287.889	2.37605e-64	5.24696e-63	-2.5025	-1.38521	3.74289	3.96891	hypothetical protein	0
GHT09_005061	-2.60098	1.84663	69.2685	8.85462e-17	5.42761e-16	2.58743	2.84656	0.610295	0.0216203	hypothetical protein	0
GHT09_005062	-2.30825	1.21601	37.8246	7.81105e-10	3.37014e-09	1.98671	2.07059	0.415434	-0.530011	serine/arginine-rich splicing factor 12	SRSF12
GHT09_005063	-1.98097	1.8417	44.4484	2.64439e-11	1.24693e-10	2.48565	2.6939	0.93532	0.552542	hypothetical protein	0
GHT09_005075	1.2802	6.98592	184.111	8.4068e-42	1.16544e-40	6.28467	6.1085	7.61072	7.33726	rho GTPase-activating protein 11A	ARHGAP11A
GHT09_005078	1.72686	2.56664	48.5277	3.30548e-12	1.6328e-11	1.3966	1.46259	3.11484	3.07617	hypothetical protein	0
GHT09_005088	-1.68781	4.17179	131.429	2.21841e-30	2.2357e-29	4.64655	4.99804	3.08235	3.22294	glucose-fructose oxidoreductase domain-containing protein 1	GFOD1
GHT09_005089	-1.25256	5.67497	127.257	1.80315e-29	1.77204e-28	6.25017	6.12779	4.92414	4.95776	NAD-dependent protein deacylase sirtuin-5 mitochondrial	SIRT5
GHT09_005093	1.10083	3.75447	43.9829	3.35354e-11	1.57482e-10	3.04647	3.09326	4.14007	4.16842	hypothetical protein	0
GHT09_005095	-2.93889	0.149615	24.2996	8.27785e-07	2.90318e-06	1.15278	0.869781	-1.43697	-1.20254	androgen-dependent TFPI-regulating protein	ADTRP
GHT09_005099	5.67083	1.79754	114.508	1.09346e-26	9.834e-26	-1.84261	-1.83829	2.4026	2.70009	hypothetical protein	0
GHT09_005100	5.72672	4.06968	507.381	1.11933e-111	5.0245e-110	-0.771375	-0.154015	5.00001	4.88403	leucine-rich repeat transmembrane protein FLRT2	FLRT2
GHT09_005102	2.25953	7.75342	607.661	3.35814e-133	1.86595e-131	6.20084	6.22253	8.41721	8.51727	TNF receptor-associated factor 1	TRAF1
GHT09_005103	-5.57246	-1.32976	10.1852	0.00141679	0.00367323	-0.539088	-0.530361	-2.5025	-2.5025	hypothetical protein	0
GHT09_005104	-7.22971	-0.171764	38.9997	4.28002e-10	1.8818e-09	0.68646	1.02414	-2.5025	-2.5025	complement C5	C5
GHT09_005107	1.00876	7.84142	136.002	2.23371e-31	2.32521e-30	7.12276	7.35963	8.20212	8.30268	gelsolin	GSN
GHT09_005108	-1.80748	8.85806	449.411	3.29677e-99	1.27164e-97	9.46345	9.53538	7.62348	7.75722	erythrocyte band 7 integral membrane protein	STOM
GHT09_005110	1.35194	7.58439	230.888	5.28732e-52	9.30669e-51	6.8533	6.63572	8.0917	8.10661	N-acetyllactosaminide alpha-1 3-galactosyltransferase	GGTA1
GHT09_005112	1.19728	7.39412	177.9	1.69133e-40	2.28163e-39	6.61802	6.71579	7.85443	7.8725	disabled 2-interacting protein	DAB2IP
GHT09_005113	2.48855	0.579285	21.3965	3.74583e-06	1.24714e-05	-0.771375	-1.04092	1.42428	0.939781	hypothetical protein	0
GHT09_005116	4.39955	1.77971	96.3495	1.01995e-22	7.93388e-22	-1.04838	-1.38521	2.66638	2.43343	LIM/homeobox protein Lhx6	LHX6
GHT09_005118	2.45398	6.3267	489.22	7.88211e-107	3.3412e-105	4.31683	4.8562	7.01031	7.10009	prostaglandin G/H synthase 1	PTGS1
GHT09_005140	1.11142	1.35096	10.0485	0.00152582	0.00394087	0.77541	0.602018	1.94149	1.52901	ADP-ribosylation factor protein 14-like	ARL14
GHT09_005143	-8.74733	1.16517	118.834	1.29365e-27	1.19964e-26	1.9102	2.59881	-2.5025	-2.5025	nuclear receptor subfamily 1 group I member 2	NR1I2
GHT09_005151	1.27372	4.17808	72.9903	1.34692e-17	8.53881e-17	3.51534	3.21047	4.5195	4.72069	hypothetical protein	0
GHT09_005159	-1.60661	3.73165	94.7675	2.26365e-22	1.73521e-21	4.31683	4.43552	2.62187	2.91276	basic leucine zipper transcriptional factor ATF 3-like	BATF3
GHT09_005162	1.94599	3.23465	89.3655	3.44896e-21	2.53059e-20	1.94896	1.88153	3.74289	3.87053	vasohibin-2	0
GHT09_005180	-3.16413	3.27268	222.147	4.15951e-50	7.05573e-49	4.19313	4.24455	1.13857	1.16401	meiosis expressed 1 protein-like	MEIG1
GHT09_005202	-3.75692	1.70665	103.553	2.70859e-24	2.2319e-23	2.61179	2.82572	-0.405289	-0.827436	suppressor of tumorigenicity 14 protein	ST14
GHT09_005216	4.37646	1.46984	77.5841	1.32048e-18	8.71514e-18	-1.04838	-1.83829	2.4026	2.06215	hypothetical protein	0
GHT09_005217	4.93879	4.60993	622.767	1.94534e-136	1.14597e-134	0.68646	0.696902	5.49863	5.46296	zinc finger protein SNAI2	SNAI2
GHT09_005218	-6.75691	-0.541921	26.6469	2.45382e-07	8.95898e-07	0.381049	0.500452	-2.5025	-2.5025	hypothetical protein	0
GHT09_005225	-5.70716	-1.25149	11.361	0.000750729	0.0020115	-0.339066	-0.530361	-2.5025	-2.5025	hypothetical protein	0
GHT09_005233	-2.25219	-0.138466	12.3988	0.000430082	0.00118463	0.490195	0.696902	-0.83081	-1.4344	hypothetical protein	0
GHT09_005237	15.2319	7.74681	3076.49	0	0	-2.5025	-2.5025	8.70414	8.75491	hypothetical protein	0
GHT09_005242	2.8239	3.87705	227.049	3.59463e-51	6.19983e-50	1.94896	1.71014	4.69626	4.51219	hypothetical protein	0
GHT09_005244	-9.09324	1.49274	150.462	1.57935e-34	1.80489e-33	2.40431	2.82572	-2.5025	-2.5025	UPF0553 protein C9orf64	C9ORF64
GHT09_005246	5.6525	0.973626	63.0017	2.11732e-15	1.21423e-14	-2.5025	-1.83829	1.70594	1.73875	hypothetical protein	0
GHT09_005249	1.32406	2.01351	21.4692	3.60667e-06	1.20236e-05	1.27983	1.09554	2.70956	2.21028	GPI inositol-deacylase	PGAP1
GHT09_005251	2.09445	0.1067	11.2344	0.00080368	0.00214806	-1.39151	-0.763173	0.610295	0.614642	inhibin beta A chain	INHBA
GHT09_005252	1.84224	2.95269	68.6059	1.23835e-16	7.5301e-16	1.55574	1.88153	3.74289	3.30056	tigger transposable element-derived protein 4	TIGD4
GHT09_005253	-6.04891	-1.03918	14.9993	0.000107716	0.000315283	0.262963	-0.763173	-2.5025	-2.5025	transmembrane protein 154	TMEM154
GHT09_005259	-6.55713	-0.689592	22.6663	1.93372e-06	6.5842e-06	0.381049	0.14419	-2.5025	-2.5025	hypothetical protein	0
GHT09_005260	-5.07088	-1.59363	6.78872	0.00917687	0.0214977	-1.04838	-0.763173	-2.5025	-2.5025	potassium voltage-gated channel subfamily KQT member 5	KCNQ5
GHT09_005263	-3.43719	5.31611	645.568	7.05164e-141	4.39317e-139	6.13513	6.3356	3.08235	2.6115	tubulin polyglutamylase TTLL7	TTLL7
GHT09_005268	-2.96522	-0.591745	12.0866	0.000508374	0.00139022	-0.16343	0.500452	-2.5025	-1.4344	hypothetical protein	0
GHT09_005277	-1.05239	6.3357	107.929	2.99373e-25	2.54436e-24	6.83012	6.72848	5.78768	5.67636	trafficking protein particle complex subunit 11	TRAPPC11
GHT09_005280	1.45639	5.0343	134.457	4.85182e-31	5.00674e-30	4.03999	4.1638	5.59389	5.51069	G patch domain-containing protein 2	GPATCH2
GHT09_005282	-8.66638	1.08988	112.218	3.45937e-26	3.05504e-25	2.22643	2.2058	-2.5025	-2.5025	kynurenine/alpha-aminoadipate aminotransferase mitochondrial	AADAT
GHT09_005283	-2.67544	2.09931	85.6366	2.26321e-20	1.60668e-19	3.02849	2.9465	0.781941	0.194237	microfibrillar-associated protein 3-like	MFAP3L
GHT09_005288	-1.18134	5.37128	105.406	1.06565e-24	8.90596e-24	5.82717	5.90494	4.79478	4.59539	F-box only protein 8	FBXO8
GHT09_005292	-4.36509	2.46911	198.511	5.61856e-45	8.41924e-44	3.39417	3.65057	-0.602418	-0.401522	protein Hook 1	0
GHT09_005298	-5.81317	1.76016	154.418	2.17232e-35	2.54187e-34	3.04647	2.6707	-1.43697	-2.05301	carbonic anhydrase 2	CA2
GHT09_005303	2.5919	4.24484	247.871	1.1e-55	2.07666e-54	2.40431	2.38747	4.99129	4.91213	zinc finger protein 462-like	ZNF462
GHT09_005305	1.15639	9.23639	192.338	1.23134e-43	1.779e-42	8.63996	8.43953	9.71116	9.68746	UV excision repair protein RAD23 B	0
GHT09_005309	-3.54997	3.92829	369.594	5.26038e-82	1.55162e-80	4.82385	4.96982	1.61802	1.28352	hypothetical protein	0
GHT09_005318	1.71977	5.2978	197.208	1.21519e-44	1.80254e-43	4.03098	4.2985	6.03686	5.72292	hypothetical protein	0
GHT09_005319	-2.2053	1.4356	40.9755	1.5581e-10	7.0464e-10	2.09436	2.35874	0.516152	-0.0731063	allograft inflammatory factor 1-like	AIF1L
GHT09_005322	-5.39545	1.36926	113.74	1.60884e-26	1.43935e-25	2.51177	2.41564	-1.43697	-2.05301	inactive phospholipid phosphatase 7	PLPP7
GHT09_005338	-10.4634	7.40169	3002.04	0	0	8.36022	8.47803	-2.5025	-0.827436	stimulated by retinoic acid 6 protein	STRA6
GHT09_005343	-3.25452	-1.33055	5.89528	0.0151858	0.0345168	-0.339066	-1.04092	-2.5025	-2.05301	hypothetical protein	0
GHT09_005347	1.06138	4.70037	66.1753	4.24009e-16	2.51797e-15	3.9085	4.18032	5.14861	5.06452	nuclear factor 1 B-type	NFIB
GHT09_005348	1.09561	6.75649	129.088	7.19038e-30	7.15523e-29	5.93729	6.24233	7.21333	7.17026	nuclear factor 1 B-type	NFIB
GHT09_005349	-3.70965	4.98985	639.622	4.77318e-140	2.9469e-138	6.08598	5.78857	2.349	2.23025	leucine rich adaptor protein 1-like	LURAP1L
GHT09_005360	-1.22726	2.99221	37.9591	7.29128e-10	3.15383e-09	3.26189	3.75349	2.4026	2.26939	uncharacterized protein	0
GHT09_005383	-5.42367	-1.41252	9.02879	0.00265921	0.00667203	-0.339066	-1.04092	-2.5025	-2.5025	hypothetical protein	0
GHT09_005384	-5.25348	4.05082	584.196	3.6075e-128	1.92141e-126	4.98172	5.22991	0.307153	-0.0731063	transmembrane protein 171	TMEM171
GHT09_005394	2.65003	4.2217	252.811	9.35703e-57	1.8063e-55	2.09436	2.52314	4.99129	4.88088	cAMP-specific 3' 5'-cyclic phosphodiesterase 4D	PDE4D
GHT09_005396	1.51275	4.07142	93.8887	3.52517e-22	2.68271e-21	3.13317	3.03996	4.49503	4.65202	hypothetical protein	0
GHT09_005397	1.35726	5.97914	153.584	3.30078e-35	3.8361e-34	5.28035	4.96029	6.48187	6.48314	elongation of very long chain fatty acids protein 7	ELOVL7
GHT09_005402	11.0568	3.69047	471.072	7.18696e-104	2.90288e-102	-2.5025	-2.5025	4.51342	4.6069	aldehyde dehydrogenase family 1 member A3	ALDH1A3
GHT09_005405	-5.12709	3.20145	354.61	9.0221e-79	2.53742e-77	4.16871	4.38654	-0.602418	-0.401522	CUB and sushi domain-containing protein 2	CSMD2
GHT09_005409	2.13561	-0.0797424	9.71362	0.00183034	0.00468441	-0.771375	-1.83829	0.610295	0.273371	gap junction beta-4 protein	GJB4
GHT09_005414	2.27651	0.439144	16.7864	4.19384e-05	0.000127376	-1.39151	-0.530361	0.307153	1.32125	disks large-associated protein 3	DLGAP3
GHT09_005415	1.6589	-0.0149028	6.91051	0.00857224	0.0201967	-0.771375	-1.04092	0.415434	0.419699	hypothetical protein	0
GHT09_005427	-9.9217	2.30007	259.645	3.0941e-58	6.17588e-57	3.50237	3.37733	-2.5025	-2.5025	UPF0500 protein C1orf216-like	C1ORF216
GHT09_005428	1.12573	4.88718	79.2239	5.76646e-19	3.85913e-18	4.13549	4.25239	5.45172	5.17941	hypothetical protein	0
GHT09_005440	1.25785	8.33752	219.427	1.61881e-49	2.71682e-48	7.67929	7.45519	8.82809	8.82943	hypothetical protein	0
GHT09_005441	1.00212	8.09682	138.186	7.4642e-32	7.80155e-31	7.41694	7.59109	8.53291	8.48335	thyroid hormone receptor-associated protein 3	THRAP3
GHT09_005449	6.34962	-0.553232	17.8404	2.4075e-05	7.48236e-05	-2.5025	-2.5025	0.0626637	0.110509	glutamate receptor ionotropic kainate 3	GRIK3
GHT09_005457	1.61971	5.99575	213.618	2.94941e-48	4.79722e-47	4.93903	4.96029	6.47563	6.64254	borealin	CDCA8
GHT09_005470	1.81505	2.55385	52.2603	4.94556e-13	2.55403e-12	1.3966	1.29071	2.90797	3.22294	rhomboid-related protein 2	RHBDL2
GHT09_005474	2.20355	1.85263	44.5806	2.47195e-11	1.16669e-10	-0.16343	0.785929	2.4026	2.46749	hypothetical protein	0
GHT09_005481	7.12754	2.32505	182.393	1.78396e-41	2.44837e-40	-1.84261	-2.5025	3.32379	2.99678	transforming growth factor beta receptor type 3	TGFBR3
GHT09_005484	-6.23883	-0.913099	17.5041	2.87286e-05	8.86301e-05	0.381049	-0.530361	-2.5025	-2.5025	uncharacterized protein	0
GHT09_005485	-5.2581	-1.50025	7.89657	0.00495521	0.0119978	-0.771375	-0.763173	-2.5025	-2.5025	hypothetical protein	0
GHT09_005494	-6.44125	4.03757	655.082	7.14697e-143	4.52106e-141	4.98172	5.24961	-0.231886	-1.4344	hypothetical protein	0
GHT09_005495	-6.2942	2.22189	218.838	2.17289e-49	3.64375e-48	3.32219	3.36294	-1.43697	-2.05301	hypothetical protein	0
GHT09_005499	1.26106	4.02765	66.0821	4.44502e-16	2.6351e-15	3.1828	3.2734	4.34565	4.57601	ectoderm-neural cortex protein 1	ENC1
GHT09_005503	3.03845	1.20783	44.2146	2.97959e-11	1.40177e-10	-0.771375	-0.763173	1.70594	1.97013	beta-1 3-galactosyl-O-glycosyl-glycoprotein beta-1 6-N-acetylglucosaminyltransferase 4	GCNT4
GHT09_005505	1.08927	8.37222	166.471	5.17408e-38	6.53402e-37	7.58477	7.85043	8.79871	8.82553	3-hydroxy-3-methylglutaryl-Coenzyme A reductase	HMGCR
GHT09_005508	-3.32791	-0.743855	11.9871	0.00053624	0.00146234	0.262963	-0.154015	-2.5025	-1.7108	hypothetical protein	0
GHT09_005514	1.18524	4.56486	76.7733	1.98923e-18	1.30161e-17	3.69709	3.94929	5.16421	4.84894	centrosomal protein of 135 kDa	CEP135
GHT09_005524	1.69029	6.04344	233.787	1.24326e-52	2.21684e-51	4.93421	4.9555	6.6589	6.60192	NHL repeat-containing protein 2	NHLRC2
GHT09_005525	5.29848	-1.25785	7.5444	0.00602232	0.0144237	-2.5025	-2.5025	-1.10229	-0.530011	hypothetical protein	0
GHT09_005526	1.97838	5.62122	276.499	6.93205e-62	1.4617e-60	4.25631	4.32845	6.37026	6.15384	caspase-7	CASP7
GHT09_005527	1.56697	5.75327	189.38	5.40861e-43	7.6581e-42	4.68724	4.80387	6.3903	6.22649	transcription factor 7 2	TCF7L2
GHT09_005529	1.43021	6.06171	173.255	1.73088e-39	2.27818e-38	5.09837	5.21796	6.59845	6.57288	palmitoyltransferase ZDHHC6	ZDHHC6
GHT09_005532	3.22649	5.76613	619.663	8.99757e-136	5.25514e-134	3.2772	3.46082	6.61699	6.53925	glycerol-3-phosphate acyltransferase 1 mitochondrial	GPAM
GHT09_005533	-1.37168	4.01191	82.0761	1.41505e-19	9.68763e-19	4.37492	4.76608	3.45645	3.01991	uncharacterized protein	0
GHT09_005537	2.42774	5.97009	427.253	1.94891e-94	7.00482e-93	4.24077	4.30605	6.70497	6.67842	actin filament-associated protein 1 2-like	AFAP1L2
GHT09_005543	1.17475	5.56813	105.153	4.31344e-24	3.53871e-23	4.43075	5.16915	6.04952	5.98485	D-aspartate oxidase	DDO
GHT09_005545	2.35762	3.93014	180.578	4.42706e-41	6.02754e-40	2.05936	2.47039	4.68007	4.52033	wiskott-Aldrich syndrome protein family member 1	WASF1
GHT09_005550	1.58322	6.63272	249.939	3.92003e-56	7.47605e-55	5.72758	5.50367	7.1194	7.27312	protein-methionine sulfoxide oxidase MICAL1	MICAL1
GHT09_005559	-1.65451	4.21776	129.418	6.09021e-30	6.08105e-29	4.82905	4.9067	3.26711	3.20286	protein Shroom1	SHROOM1
GHT09_005560	-1.69255	1.46124	26.6358	2.47419e-07	9.02696e-07	2.09436	2.17317	-0.405289	0.987501	ankyrin repeat domain-containing protein SOWAHA	SOWAHA
GHT09_005565	1.51643	4.26444	104.235	1.92206e-24	1.59402e-23	3.32219	3.24228	4.91495	4.6594	hypothetical protein	0
GHT09_005568	1.45513	1.55151	18.6216	1.59775e-05	5.04968e-05	0.591662	0.696902	1.97727	2.01688	hypothetical protein	0
GHT09_005572	-6.24094	4.83282	962.627	6.19916e-209	7.08047e-207	5.91054	5.86973	-0.602418	0.194237	PDZ and LIM domain protein 4	PDLIM4
GHT09_005580	-3.11526	0.923066	47.4585	5.69883e-12	2.78031e-11	1.82941	1.88153	-0.602418	-1.00283	interferon-induced protein 44	IFI44
GHT09_005583	4.86402	-1.50366	5.27007	0.0217001	0.0480539	-2.5025	-2.5025	-0.83081	-1.20254	growth/differentiation factor 2	GDF2
GHT09_005592	2.2892	6.72067	493.509	7.63022e-108	3.26812e-106	4.89008	5.36608	7.40118	7.45915	ras association domain-containing protein 4	RASSF4
GHT09_005593	1.07638	2.36421	18.5669	1.64424e-05	5.19261e-05	1.65285	1.75494	2.90797	2.59619	protein DEPP	DEPP1
GHT09_005602	5.42905	-1.18297	8.37956	0.00379665	0.00935578	-2.5025	-2.5025	-0.602418	-0.671073	transcription factor 7	TCF7
GHT09_005614	4.53241	2.53109	164.172	1.63693e-37	2.03838e-36	-0.771375	-0.763173	3.20812	3.39205	NEDD4-binding protein 3	N4BP3
GHT09_005615	1.07025	5.7354	92.6362	6.62819e-22	5.00621e-21	5.14919	5.02115	6.07244	6.224	protein RMD5 B	0
GHT09_005634	-1.24041	4.64843	91.8142	1.00318e-21	7.51341e-21	5.16573	5.1774	3.96405	3.92056	DDB1- and CUL4-associated factor 10	DCAF10
GHT09_005644	-8.86445	4.2769	827.492	3.49501e-180	3.11056e-178	5.20229	5.51999	-1.87352	-2.05301	estrogen-related receptor gamma	ESRRG
GHT09_005648	1.29926	1.34232	13.2091	0.000278939	0.000782894	0.591662	0.500452	1.47521	1.92183	fibroblast growth factor 5	FGF5
GHT09_005651	-1.14707	1.78656	15.806	7.03009e-05	0.000209679	1.87037	2.62317	1.25972	1.16401	hypothetical protein	0
GHT09_005653	-3.9275	1.13183	73.4587	1.06284e-17	6.7608e-17	1.87037	2.38747	-1.43697	-1.00283	hypothetical protein	0
GHT09_005657	-9.67305	6.35108	2001.23	0	0	7.38284	7.38834	-0.83081	-2.05301	dipeptidyl peptidase 4	DPP4
GHT09_005660	-1.50299	6.98968	255.132	2.93918e-57	5.74396e-56	7.5243	7.60645	5.98728	6.13278	melanoma-associated antigen D4	MAGED4
GHT09_005671	4.09775	9.53983	1846.5	0	0	6.28656	6.42667	10.3643	10.5365	heparan-sulfate 6-O-sulfotransferase 1	HS6ST1
GHT09_005674	-1.78158	5.07758	208.544	3.72548e-47	5.89625e-46	5.60855	5.87228	4.03366	3.92669	hypothetical protein	0
GHT09_005678	-1.33802	3.03693	45.8648	1.28403e-11	6.16784e-11	3.76383	3.43352	2.47946	2.14865	hypothetical protein	0
GHT09_005682	1.941	2.73925	65.1082	7.28032e-16	4.27279e-15	1.2177	1.61616	3.16223	3.40967	rho GTPase-activating protein 22	ARHGAP22
GHT09_005690	-7.08848	-0.285063	34.8184	3.64774e-09	1.50924e-08	0.77541	0.696902	-2.5025	-2.5025	hypothetical protein	0
GHT09_005700	-7.10234	3.40926	476.921	3.96487e-105	1.63354e-103	4.5553	4.48289	-1.43697	-1.7108	hypothetical protein	0
GHT09_005707	-1.41795	8.70582	282.471	3.53503e-63	7.6261e-62	9.20658	9.294	7.83384	7.83346	semaphorin-5A	SEMA5A
GHT09_005708	-1.71357	5.57005	222.71	3.55549e-50	6.03612e-49	6.05966	6.35392	4.62475	4.40205	hypothetical protein	0
GHT09_005711	-2.27834	3.64835	167.084	4.14976e-38	5.25986e-37	4.32422	4.5732	1.78881	2.46749	A disintegrin and metalloproteinase with thrombospondin motifs 12	ADAMTS12
GHT09_005712	-1.59682	0.849036	15.3088	9.14395e-05	0.000269985	1.3966	1.56676	0.516152	-0.401522	hypothetical protein	0
GHT09_005714	-5.28454	5.7251	1188.57	1.39807e-243	2.1291e-241	6.53128	6.92013	1.0063	1.82007	alpha-methylacyl-CoA racemase	AMACR
GHT09_005717	-1.47402	5.72772	174.923	7.50945e-40	9.96043e-39	6.16836	6.43357	4.94687	4.73823	cell cycle checkpoint protein RAD1	RAD1
GHT09_005718	-1.38449	6.49058	191.32	2.22658e-43	3.18333e-42	7.18395	6.87391	5.67782	5.63576	hypothetical protein	0
GHT09_005720	-9.71403	2.09471	226.453	6.52421e-51	1.11963e-49	2.89591	3.51391	-2.5025	-2.5025	alanine--glyoxylate aminotransferase 2 mitochondrial	AGXT2
GHT09_005731	-1.13253	0.769515	7.63561	0.00572525	0.0137587	1.45162	1.02414	0.0626637	0.348389	hypothetical protein	0
GHT09_005762	5.65247	-1.04508	10.0506	0.00152413	0.003937	-2.5025	-2.5025	-0.231886	-0.671073	hypothetical protein	0
GHT09_005765	1.44714	5.50575	153.694	3.12277e-35	3.63128e-34	4.61074	4.56064	6.06207	5.99365	serine/threonine-protein kinase VRK1	VRK1
GHT09_005779	2.35008	3.67741	154.801	1.79285e-35	2.10865e-34	1.74383	2.26893	4.2611	4.38879	hypothetical protein	0
GHT09_005781	1.17196	6.44803	134.368	5.07314e-31	5.22277e-30	5.73592	5.73368	6.9973	6.81032	endoribonuclease Dicer	DICER1
GHT09_005784	-4.85546	-1.69346	5.70752	0.0168968	0.0380145	-0.771375	-1.38521	-2.5025	-2.5025	hypothetical protein	0
GHT09_005786	1.53077	2.36061	34.7911	3.69905e-09	1.52985e-08	1.15278	1.56676	2.85126	2.83664	hypothetical protein	0
GHT09_005787	1.5051	2.01344	26.8536	2.20497e-07	8.0693e-07	0.859193	1.22854	2.50419	2.46749	hypothetical protein	0
GHT09_005798	8.99624	1.72409	126.248	2.99405e-29	2.92838e-28	-2.5025	-2.5025	2.70956	2.3808	hypothetical protein	0
GHT09_005799	10.5827	3.23096	353.563	1.51845e-78	4.26472e-77	-2.5025	-2.5025	4.19428	4.00413	hypothetical protein	0
GHT09_005803	-1.50233	3.99931	96.9273	7.62296e-23	5.96348e-22	4.39611	4.79853	3.16223	3.09808	monocarboxylate transporter 5	SLC16A4
GHT09_005804	-1.04383	5.527	86.4564	1.49639e-20	1.06932e-19	6.00783	5.94173	4.98252	4.89346	ragulator complex protein LAMTOR5	LAMTOR5
GHT09_005811	-4.58762	-0.496602	21.7002	3.19755e-06	1.07118e-05	0.381049	0.500452	-2.5025	-2.05301	leukocyte surface antigen CD53	CD53
GHT09_005816	-4.15467	3.22253	296.747	3.58983e-66	8.13707e-65	4.18504	4.32102	0.860668	-0.283546	DENN domain-containing protein 2D	DENND2D
GHT09_005817	-5.07077	-1.59364	6.78835	0.00917875	0.0214977	-0.771375	-1.04092	-2.5025	-2.5025	hypothetical protein	0
GHT09_005824	1.0694	4.01664	48.3387	3.63939e-12	1.79344e-11	3.24642	3.46082	4.51342	4.32521	rotatin	RTTN
GHT09_005825	-1.45373	5.2573	151.832	7.94612e-35	9.14694e-34	5.9469	5.71963	4.31801	4.44968	protein arginine N-methyltransferase 6	PRMT6
GHT09_005827	-3.40889	3.15834	228.847	1.46466e-51	2.56054e-50	3.9085	4.32845	0.93532	0.786352	hypothetical protein	0
GHT09_005828	2.03371	9.33738	561.96	2.12637e-123	1.0929e-121	7.86429	8.0976	10.0741	9.96143	hypothetical protein	0
GHT09_005830	-6.62712	-0.638657	23.9879	9.73112e-07	3.39203e-06	-0.00687362	0.602018	-2.5025	-2.5025	hypothetical protein	0
GHT09_005831	1.93257	8.82283	503.483	7.70304e-111	3.42785e-109	7.51464	7.58568	9.42415	9.53736	integrin beta-5	ITGB5
GHT09_005835	1.74199	3.27578	76.271	2.56418e-18	1.67249e-17	2.02349	2.2058	3.81386	3.82529	hypothetical protein	0
GHT09_005848	9.15995	1.88622	140.727	2.0857e-32	2.22869e-31	-2.5025	-2.5025	2.68813	2.70009	leucine-rich repeat-containing protein 61	LRRC61
GHT09_005849	-1.32622	8.01786	237.897	1.59709e-53	2.8777e-52	8.50625	8.57178	7.17051	7.25435	retinoic acid receptor responder protein 2	RARRES2
GHT09_005850	-1.1354	7.22668	157.313	5.09165e-36	6.09664e-35	7.72188	7.66483	6.50503	6.60861	replication initiator 1	REPIN1
GHT09_005859	-5.70716	-1.25149	11.361	0.000750729	0.0020115	-0.339066	-0.530361	-2.5025	-2.5025	storkhead-box protein 2	STOX2
GHT09_005865	-2.06381	3.12205	105.848	8.53385e-25	7.14653e-24	3.85848	3.92009	1.61802	2.03969	hypothetical protein	0
GHT09_005866	-1.93957	3.60847	124.373	7.67973e-29	7.39174e-28	4.45788	4.21279	2.26465	2.54926	hypothetical protein	0
GHT09_005867	-2.16049	2.17626	64.3619	1.06264e-15	6.19593e-15	2.81429	3.1106	1.0063	0.839329	hypothetical protein	0
GHT09_005868	-1.33315	6.13191	160.081	1.27109e-36	1.54538e-35	6.5861	6.74384	5.34281	5.33277	galectin-9	LGALS9
GHT09_005877	-3.70567	2.22422	143.095	6.64775e-33	7.18565e-32	2.93505	3.48761	0.190081	-0.530011	hypothetical protein	0
GHT09_005878	-5.1257	0.643143	64.7119	8.89906e-16	5.205e-15	1.50462	1.88153	-1.43697	-2.5025	hypothetical protein	0
GHT09_005879	-1.00407	7.323	126.378	2.80491e-29	2.74601e-28	7.68648	7.80389	6.67805	6.802	RING finger protein 44	RNF44
GHT09_005885	-1.75558	7.78367	393.433	3.79154e-87	1.21607e-85	8.3834	8.45064	6.71824	6.61051	neurocalcin-delta	NCALD
GHT09_005887	-3.35091	5.8204	721.077	1.79167e-157	1.29245e-155	6.68269	6.76726	3.36488	3.4184	5'-AMP-activated protein kinase subunit beta-2	PRKAB2
GHT09_005888	-7.13733	-0.246286	36.2094	1.78705e-09	7.54877e-09	0.490195	1.02414	-2.5025	-2.5025	dimethylaniline monooxygenase N-oxide-forming 5	FMO5
GHT09_005889	-4.86897	-0.285809	28.0117	1.21201e-07	4.51979e-07	0.68646	0.696902	-2.5025	-2.05301	myomegalin-like	PDE4DIP
GHT09_005899	-2.13057	6.35596	405.753	8.36862e-90	2.80213e-88	6.98151	7.17418	5.07209	4.84894	hypothetical protein	0
GHT09_005903	1.96106	7.30703	437.796	3.16045e-96	1.16863e-94	5.81411	6.17594	8.03236	7.89536	fibrillin-1	FBN1
GHT09_005917	1.01899	6.79077	113.299	2.00906e-26	1.78806e-25	6.20685	6.16145	7.18779	7.2148	polypeptide N-acetylgalactosaminyltransferase 10	GALNT10
GHT09_005925	1.61182	-0.0468307	6.39659	0.0114377	0.026421	-1.84261	-0.329951	0.415434	0.348389	hypothetical protein	0
GHT09_005927	2.83186	6.60808	675.005	1.27271e-147	8.35965e-146	4.56781	4.5732	7.44416	7.34358	hypothetical protein	0
GHT09_005929	1.04771	7.51413	139.895	7.34993e-32	7.68603e-31	6.97801	6.79836	7.70508	8.13204	hypothetical protein	0
GHT09_005930	1.027	6.84256	116.601	3.81756e-27	3.4805e-26	6.1663	6.29257	7.17341	7.33091	ranBP-type and C3HC4-type zinc finger-containing protein 1	RBCK1
GHT09_005934	-2.10328	7.37795	516.981	9.68083e-114	4.51311e-112	8.18815	7.98107	5.97185	6.00238	hypothetical protein	0
GHT09_005946	-1.41912	1.57311	20.7357	5.28745e-06	1.73733e-05	2.12852	2.2058	0.307153	1.12186	hypothetical protein	0
GHT09_005949	-2.42502	-0.641716	8.53927	0.00347754	0.0086159	0.134344	0.00277842	-2.5025	-1.20254	signal-regulatory protein beta-2	SIRPB2
GHT09_005952	-7.84062	0.343553	63.2142	1.90111e-15	1.09482e-14	1.65285	1.16357	-2.5025	-2.5025	UDP-glucuronosyltransferase 2B31-like	0
GHT09_005954	-6.48408	-0.742316	21.3606	3.81673e-06	1.2693e-05	0.134344	0.272969	-2.5025	-2.5025	hypothetical protein	0
GHT09_005957	1.30894	1.7864	18.0544	2.15152e-05	6.72644e-05	1.08479	0.869781	2.50419	1.94618	hypothetical protein	0
GHT09_005963	2.31465	-0.506318	7.18825	0.00734118	0.0174261	-1.39151	-1.83829	-0.0771072	0.0216203	hypothetical protein	0
GHT09_005965	3.20883	-0.298616	13.4706	0.000242639	0.000687109	-1.84261	-1.83829	0.190081	0.348389	hypothetical protein	0
GHT09_005966	2.52606	1.77073	51.511	7.23983e-13	3.70442e-12	-0.16343	0.272969	2.32143	2.45056	hypothetical protein	0
GHT09_005968	4.17408	-0.261344	18.1118	2.08771e-05	6.53291e-05	-2.5025	-1.83829	0.190081	0.487649	hypothetical protein	0
GHT09_005970	1.73189	6.48182	281.228	6.5669e-63	1.40781e-61	5.44192	5.2613	7.0518	7.1109	hypothetical protein	0
GHT09_005971	1.2289	3.35636	43.2671	4.83271e-11	2.25245e-10	2.77168	2.35874	3.80393	3.77178	hypothetical protein	0
GHT09_005973	4.80156	1.50526	84.7008	3.62938e-20	2.55451e-19	-1.39151	-1.83829	2.04626	2.39856	hypothetical protein	0
GHT09_005974	2.92823	0.95471	34.6477	3.98162e-09	1.64275e-08	-1.04838	-0.763173	1.07395	1.87185	hypothetical protein	0
GHT09_005976	3.33097	4.52271	400.961	9.02974e-89	2.97981e-87	2.19453	1.84056	5.18348	5.40703	hypothetical protein	0
GHT09_005977	2.83704	4.01615	247.848	1.11277e-55	2.09884e-54	2.02349	1.88153	4.57892	4.8618	histone H3	0
GHT09_005978	2.95448	0.972258	35.574	2.47549e-09	1.0359e-08	-1.04838	-0.763173	1.25972	1.82007	hypothetical protein	0
GHT09_005979	4.84809	-1.5057	5.22377	0.0222853	0.0492226	-2.5025	-2.5025	-1.87352	-0.671073	hypothetical protein	0
GHT09_005982	2.67621	5.13213	385.889	1.60531e-85	4.99298e-84	3.23077	3.19429	5.73901	5.97453	histone H1.4	H1-4
GHT09_005983	3.53668	4.17825	358.786	1.13183e-79	3.22737e-78	1.01344	1.88153	4.92872	5.002	hypothetical protein	0
GHT09_005984	3.02118	5.57912	534.39	1.76299e-117	8.5283e-116	3.35141	3.37733	6.32586	6.40072	hypothetical protein	0
GHT09_005985	3.16092	-0.337017	12.771	0.000352446	0.000981434	-1.84261	-1.83829	0.307153	0.194237	histone H1t	H1-6
GHT09_005986	4.03508	0.346191	30.9029	2.72945e-08	1.06804e-07	-1.39151	-2.5025	1.0063	1.03369	hypothetical protein	0
GHT09_005987	3.20551	4.76273	427.58	1.65646e-94	5.97461e-93	2.25764	2.49701	5.55595	5.53699	hereditary hemochromatosis protein	HFE
GHT09_005988	2.57702	7.64707	741.065	1.08719e-131	6.00845e-130	6.00553	5.64424	8.18501	8.60019	hypothetical protein	0
GHT09_005990	2.87025	-0.549739	9.21514	0.00240172	0.00607492	-1.39151	-2.5025	0.415434	-0.401522	hypothetical protein	0
GHT09_005991	2.17125	-0.599143	5.95084	0.0147145	0.0335085	-1.84261	-1.38521	-0.231886	-0.0731063	hypothetical protein	0
GHT09_005992	6.40418	-0.508562	18.6854	1.54519e-05	4.88956e-05	-2.5025	-2.5025	-0.0771072	0.273371	hypothetical protein	0
GHT09_005993	7.79966	0.651198	55.6546	8.80891e-14	4.69299e-13	-2.5025	-2.5025	1.07395	1.59211	hypothetical protein	0
GHT09_005994	5.97319	-0.809991	13.1957	0.000282158	0.000791388	-2.5025	-2.5025	-1.87352	0.348389	hypothetical protein	0
GHT09_005995	2.47064	-0.80447	5.75951	0.016404	0.0371135	-1.39151	-2.5025	-0.231886	-0.401522	hypothetical protein	0
GHT09_006001	-5.57246	-1.32976	10.1852	0.00141679	0.00367323	-0.539088	-0.530361	-2.5025	-2.5025	hypothetical protein	0
GHT09_006005	1.95264	0.961994	19.7083	9.04416e-06	2.90984e-05	-0.539088	0.00277842	1.37148	1.56091	hypothetical protein	0
GHT09_006007	-3.06959	1.2319	58.5206	2.05546e-14	1.12719e-13	1.94896	2.35874	-0.231886	-0.827436	hypothetical protein	0
GHT09_006017	1.50615	1.85362	24.0854	9.25089e-07	3.23286e-06	0.77541	1.02414	2.50419	2.16949	protein FAM69A	DIPK1A
GHT09_006034	-1.49418	6.87476	245.061	4.47224e-55	8.28332e-54	7.47286	7.42432	6.00472	5.91253	aspartyl/asparaginyl beta-hydroxylase	ASPH
GHT09_006044	-1.91431	5.34491	256.962	1.1798e-57	2.31888e-56	6.19883	5.86208	4.14794	4.1264	transforming growth factor-beta receptor-associated protein 1	TGFBRAP1
GHT09_006046	-2.115	6.0481	364.242	7.51954e-81	2.18045e-79	6.83272	6.71438	4.70162	4.63713	28S ribosomal protein S9 mitochondrial	MRPS9
GHT09_006047	-6.69325	-0.589513	25.3098	4.90264e-07	1.74595e-06	0.490195	0.272969	-2.5025	-2.5025	hypothetical protein	0
GHT09_006050	-4.69216	0.743749	65.0332	7.642e-16	4.47612e-15	1.94896	1.61616	-1.10229	-2.5025	hypothetical protein	0
GHT09_006058	1.55698	1.52697	20.5579	5.80161e-06	1.9002e-05	0.134344	0.869781	1.82852	2.10605	hypothetical protein	0
GHT09_006063	3.40317	1.8118	76.8115	1.95125e-18	1.27798e-17	-0.771375	-0.329951	2.42868	2.58071	hypothetical protein	0
GHT09_006075	4.0274	-0.377934	15.7003	7.43358e-05	0.000221392	-2.5025	-1.83829	0.307153	0.194237	cytohesin-interacting protein	CYTIP
GHT09_006078	-5.2582	-1.50024	7.89698	0.00495407	0.0119978	-1.04838	-0.530361	-2.5025	-2.5025	hypothetical protein	0
GHT09_006082	1.35367	7.02392	206.752	9.12085e-47	1.43032e-45	6.25017	6.11496	7.53172	7.53989	transcriptional repressor CTCF	CTCF
GHT09_006089	5.52523	-1.11509	9.10856	0.00254571	0.00641703	-2.5025	-2.5025	-1.43697	-0.174493	puratrophin-1	PLEKHG4
GHT09_006090	3.3075	-0.223583	14.9762	0.000109045	0.000318852	-2.5025	-1.38521	0.190081	0.487649	hypothetical protein	0
GHT09_006091	4.23398	0.510029	36.6848	1.40061e-09	5.94819e-09	-1.84261	-1.83829	1.25972	1.16401	hypothetical protein	0
GHT09_006095	-1.21069	5.2807	107.89	3.05372e-25	2.5932e-24	5.78762	5.78588	4.62475	4.54446	engulfment and cell motility protein 3	ELMO3
GHT09_006099	-1.25644	0.978785	10.805	0.00101312	0.00267412	1.60511	1.40754	-0.0771072	0.614642	F-box/LRR-repeat protein 8	FBXL8
GHT09_006104	-5.25831	-1.50022	7.8974	0.00495292	0.0119978	-1.39151	-0.329951	-2.5025	-2.5025	carboxylesterase 3	CES3
GHT09_006110	-5.83074	-1.17717	12.5596	0.000394623	0.00109301	-1.04838	0.14419	-2.5025	-2.5025	hypothetical protein	0
GHT09_006115	5.02821	0.437995	39.094	4.07848e-10	1.79587e-09	-1.84261	-2.5025	0.781941	1.35802	GTP-binding protein RAD	RRAD
GHT09_006116	-4.72532	5.27711	927.983	2.90045e-199	2.98152e-197	6.06849	6.47097	1.42428	1.76637	cadherin-16	CDH16
GHT09_006118	-6.69334	-0.589503	25.3109	4.89983e-07	1.74555e-06	0.381049	0.391189	-2.5025	-2.5025	carbonic anhydrase 7	CA7
GHT09_006123	-1.10085	3.37486	38.4929	5.54746e-10	2.42402e-09	3.9183	3.80765	2.83185	2.74243	chemokine factor	CKLF
GHT09_006124	-1.11291	5.34793	93.5505	4.18056e-22	3.17621e-21	5.722	5.91484	4.71757	4.71006	thymidine kinase 2 mitochondrial	TK2
GHT09_006130	-4.11546	4.85177	686.297	4.88736e-150	3.32712e-148	5.86313	5.81526	1.74797	1.82007	zinc finger protein 385B	ZNF385B
GHT09_006135	-1.22166	8.30786	208.58	3.65743e-47	5.793e-46	8.80123	8.79295	7.66177	7.48899	BCL2/adenovirus E1B 19 kDa protein-interacting protein 3	BNIP3
GHT09_006150	-10.0284	2.40601	278.004	3.2743e-62	6.93269e-61	3.67414	3.4057	-2.5025	-2.5025	cysteine/serine-rich nuclear protein 3	CSRNP3
GHT09_006152	-1.72777	6.11498	258.574	5.2787e-58	1.04855e-56	6.75419	6.75767	5.08445	4.9874	tetratricopeptide repeat protein 21B	TTC21B
GHT09_006153	-5.17688	0.683639	67.3024	2.39589e-16	1.43899e-15	1.55574	1.92138	-1.87352	-2.05301	hypothetical protein	0
GHT09_006161	-6.44472	5.19164	1129.2	3.75923e-241	5.60043e-239	6.3621	6.10418	0.610295	-0.530011	glycine N-acyltransferase protein Keg1	KEG1
GHT09_006174	1.7318	3.79146	101.141	9.12819e-24	7.37972e-23	2.81429	2.44328	4.38613	4.31121	high mobility group protein B3	HMGB3
GHT09_006177	1.10283	5.49013	92.2501	8.05246e-22	6.05082e-21	4.77615	4.8562	5.81264	6.00238	hypothetical protein	0
GHT09_006182	-1.24858	5.28603	114.626	1.03037e-26	9.27067e-26	5.79562	5.81261	4.59051	4.53646	transcription factor II-I repeat domain-containing protein 1	GTF2IRD1
GHT09_006186	-3.64819	0.20691	33.7523	6.30547e-09	2.56854e-08	1.15278	1.16357	-2.5025	-1.20254	hypothetical protein	0
GHT09_006188	-1.41561	5.57563	156.859	6.39184e-36	7.63567e-35	6.13092	6.15102	4.70162	4.75556	hypothetical protein	0
GHT09_006189	-1.25949	4.68507	95.8569	1.30728e-22	1.01191e-21	5.26123	5.16501	3.96405	3.96295	hypothetical protein	0
GHT09_006194	3.11145	3.17545	169.686	1.03386e-38	1.33261e-37	0.68646	1.09554	3.79393	3.98074	hypothetical protein	0
GHT09_006196	-3.80902	4.66136	581.23	1.56074e-127	8.22748e-126	5.79029	5.45699	1.90481	1.87185	claudin-3	CLDN3
GHT09_006203	-5.4157	0.15205	45.5386	1.51637e-11	7.24835e-11	1.01344	1.3503	-2.5025	-2.05301	hypothetical protein	0
GHT09_006204	-8.92167	3.48427	527.265	5.97972e-116	2.83919e-114	4.56781	4.63442	-1.87352	-2.5025	carbohydrate-responsive element-binding protein	MLXIPL
GHT09_006222	1.2184	7.62656	190.447	3.17125e-43	4.52133e-42	6.92553	6.84572	8.07271	8.13271	ATP-dependent 6-phosphofructokinase platelet type	PFKP
GHT09_006228	1.19942	7.44396	179.858	6.34501e-41	8.61605e-40	6.66097	6.76999	8.0104	7.81539	ras GTPase-activating protein 1	RASA1
GHT09_006233	3.47177	0.347575	26.776	2.29534e-07	8.39081e-07	-1.84261	-1.38521	1.07395	0.939781	synaptotagmin protein 3	SYTL3
GHT09_006234	-1.22996	7.16494	181.133	3.35307e-41	4.57438e-40	7.69861	7.62391	6.38365	6.47793	ezrin	EZR
GHT09_006235	-2.37684	6.85819	567.622	1.29582e-124	6.7105e-123	7.65605	7.588	5.24347	5.25691	non-syndromic hearing impairment protein 5	GSDME
GHT09_006241	-6.20609	7.91771	2672.13	0	0	8.85005	8.97111	2.83185	2.67116	protein KIBRA	WWC1
GHT09_006247	-1.02903	6.31079	102.558	4.47129e-24	3.66674e-23	6.76916	6.72567	5.7801	5.6654	hypothetical protein	0
GHT09_006251	2.01942	-0.150795	8.31466	0.00393468	0.00966811	-1.39151	-1.04092	0.0626637	0.487649	hypothetical protein	0
GHT09_006254	1.76648	-0.115766	6.96042	0.00833641	0.0196749	-0.771375	-1.38521	0.0626637	0.487649	hypothetical protein	0
GHT09_006258	1.48034	5.71317	168.977	1.47499e-38	1.89527e-37	4.68724	4.85105	6.3431	6.14992	hypothetical protein	0
GHT09_006260	1.37198	4.26312	87.197	1.02982e-20	7.41056e-20	3.5282	3.22646	4.6582	4.81297	RNA polymerase II elongation factor ELL2	ELL2
GHT09_006284	4.86936	-1.50298	5.28567	0.0215066	0.0476459	-2.5025	-2.5025	-0.602418	-1.4344	hypothetical protein	0
GHT09_006291	-3.24904	-1.32985	5.87483	0.0153631	0.0348659	-0.539088	-0.763173	-1.87352	-2.5025	putative G-protein coupled receptor 75	0
GHT09_006295	-6.40683	-0.797053	20.0635	7.5113e-06	2.43496e-05	0.262963	0.00277842	-2.5025	-2.5025	hypothetical protein	0
GHT09_006296	1.25736	3.63543	52.6074	4.14517e-13	2.15149e-12	2.68249	2.98461	4.16355	4.00413	zinc finger protein 703	ZNF703
GHT09_006307	1.22984	3.64742	50.8657	1.00535e-12	5.10218e-12	2.79314	2.9465	4.10816	4.061	phospholipid phosphatase 5	PLPP5
GHT09_006310	10.5354	5.59385	1292.09	1.24846e-278	2.33338e-276	-1.84261	-2.5025	6.5621	6.51096	fibroblast growth factor receptor 1	FGFR1
GHT09_006311	1.38535	3.83846	70.3432	5.13975e-17	3.17894e-16	3.13317	2.73919	4.33879	4.29708	hypothetical protein	0
GHT09_006317	1.17592	4.2913	66.5448	3.51633e-16	2.09421e-15	3.56609	3.55248	4.86808	4.58767	hypothetical protein	0
GHT09_006319	-2.21974	4.93799	292.169	2.81749e-65	6.28251e-64	5.73314	5.67371	3.58953	3.42708	L-2-hydroxyglutarate dehydrogenase mitochondrial	L2HGDH
GHT09_006320	1.2166	2.1035	19.5979	9.5819e-06	3.07803e-05	1.45162	1.22854	2.42868	2.56507	hypothetical protein	0
GHT09_006333	-4.14102	2.83424	233.921	1.43528e-52	2.55479e-51	3.51534	4.1638	-0.0771072	0.0216203	hypothetical protein	0
GHT09_006337	-4.18135	-0.136734	28.2183	1.08935e-07	4.07718e-07	0.859193	0.785929	-1.87352	-2.05301	V-set and transmembrane domain-containing protein 5	VSTM5
GHT09_006344	-9.57919	1.96299	206.741	9.17085e-47	1.43707e-45	3.1828	3.02175	-2.5025	-2.5025	brain-enriched guanylate kinase-associated protein	BEGAIN
GHT09_006346	1.60794	4.49482	129.48	5.90564e-30	5.90535e-29	3.56609	3.30387	4.8917	5.14826	hypothetical protein	0
GHT09_006347	1.62799	5.78211	204.689	2.99746e-46	4.62996e-45	4.84968	4.59184	6.17613	6.49247	hypothetical protein	0
GHT09_006348	3.2866	1.95349	81.4499	1.87338e-19	1.27786e-18	-1.04838	0.14419	2.55242	2.72846	solute carrier family 25 member 47	SLC25A47
GHT09_006349	3.17274	4.50229	373.369	8.06159e-83	2.42662e-81	2.34742	1.92138	5.27615	5.27385	mitochondrial basic amino acids transporter	SLC25A29
GHT09_006352	1.1986	4.28461	68.808	1.11788e-16	6.82785e-16	3.51534	3.55248	4.69626	4.74171	hypothetical protein	0
GHT09_006353	1.1585	3.73943	47.8725	4.64465e-12	2.27464e-11	2.68249	3.28871	4.2611	4.06656	hypothetical protein	0
GHT09_006355	2.84894	3.34085	167.773	2.86693e-38	3.6655e-37	1.69906	0.696902	4.01657	4.07211	echinoderm microtubule-associated protein 1	0
GHT09_006363	1.4416	-0.0115565	5.48135	0.0192252	0.0429014	-0.339066	-1.38521	0.781941	0.0216203	hypothetical protein	0
GHT09_006364	4.67063	2.47881	162.464	3.85144e-37	4.75281e-36	-0.539088	-1.38521	3.19298	3.31932	hypothetical protein	0
GHT09_006365	4.8362	3.90953	411.749	4.26759e-91	1.45986e-89	-0.539088	0.602018	4.68549	4.80301	hypothetical protein	0
GHT09_006370	-2.64749	2.02697	80.4436	3.11417e-19	2.10884e-18	2.91561	2.90735	0.610295	0.273371	aspartate beta-hydroxylase domain-containing protein 2	ASPHD2
GHT09_006371	1.05954	4.83507	69.4338	8.14393e-17	4.99645e-16	4.00363	4.35051	5.2398	5.23977	Krueppel factor 7-like	KLF7
GHT09_006376	5.99622	-0.806642	13.3728	0.000255618	0.000720785	-2.5025	-2.5025	-0.405289	-0.0731063	disintegrin and metalloproteinase domain-containing protein 23	ADAM23
GHT09_006377	-1.76312	5.0939	205.413	1.78183e-46	2.7689e-45	5.68516	5.82579	4.14794	3.87688	DBF4-type zinc finger-containing protein 2	ZDBF2
GHT09_006379	-1.26209	9.19666	228.67	1.59994e-51	2.79229e-50	9.72551	9.66664	8.40125	8.46661	elongation factor 1-beta	EEF1B2
GHT09_006382	2.85309	6.81226	727.014	9.652e-159	7.06176e-157	4.78688	4.72726	7.62207	7.58421	neuropilin-2	NRP2
GHT09_006383	1.93107	2.77954	66.1593	4.27448e-16	2.53619e-15	1.50462	1.46259	3.43087	3.28154	partitioning defective 3 B-like	0
GHT09_006385	1.82933	0.864499	16.5914	4.64469e-05	0.000140716	-0.16343	-0.329951	1.42428	1.32125	hypothetical protein	0
GHT09_006386	1.5881	6.3045	227.253	3.24699e-51	5.61436e-50	5.32524	5.24569	6.87225	6.86802	protein furry-like	FRYL
GHT09_006388	-5.57246	-1.32976	10.1852	0.00141679	0.00367323	-0.539088	-0.530361	-2.5025	-2.5025	sodium/bile acid cotransporter 4	SLC10A4
GHT09_006393	-1.11932	1.32353	11.1741	0.000830207	0.00221694	1.45162	2.1056	0.307153	1.03369	hypothetical protein	0
GHT09_006398	-3.41097	0.0291344	26.3438	2.8703e-07	1.04296e-06	0.77541	1.09554	-1.87352	-1.4344	hypothetical protein	0
GHT09_006399	-3.0164	-0.247331	17.3084	3.18422e-05	9.77519e-05	0.68646	0.500452	-1.10229	-2.05301	hypothetical protein	0
GHT09_006402	3.83197	5.17571	629.694	6.38524e-138	3.83843e-136	2.05936	2.38747	6.00905	6.02257	ankyrin repeat domain-containing protein 1	ANKRD1
GHT09_006412	1.1201	5.57435	97.0162	7.28928e-23	5.70679e-22	5.00489	4.76608	6.03262	5.98191	NUAK family SNF1 kinase 1-like	NUAK1
GHT09_006422	-1.28608	3.92783	69.6087	7.45397e-17	4.57724e-16	4.41007	4.53519	3.35132	3.07617	transcription termination factor 2 mitochondrial	MTERF2
GHT09_006431	-5.06099	2.91645	294.75	7.78987e-66	1.76185e-64	4.08418	3.91022	-0.83081	-0.530011	hypothetical protein	0
GHT09_006439	-8.35387	0.801407	90.2714	2.18401e-21	1.61398e-20	1.69906	2.1056	-2.5025	-2.5025	hibernation-associated plasma protein HP-25-like	0
GHT09_006442	2.22541	3.74556	148.081	5.21244e-34	5.83674e-33	1.98671	2.38747	4.35247	4.41083	glycosyltransferase protein LARGE1-like	LARGE1
GHT09_006443	-4.85534	-1.69347	5.70721	0.0168999	0.0380145	-0.539088	-1.83829	-2.5025	-2.5025	aldo-keto reductase family 1 member C3	AKR1C3
GHT09_006444	-3.75236	4.42909	514.261	3.71931e-113	1.71832e-111	5.44192	5.36608	1.5244	1.84619	hypothetical protein	0
GHT09_006447	3.48851	4.10725	339.173	1.9447e-75	5.23997e-74	1.74383	1.16357	4.87283	4.90903	hypothetical protein	0
GHT09_006450	6.64299	3.21002	318.58	5.47549e-71	1.34172e-69	-2.5025	-1.04092	4.1162	4.00992	delta and Notch epidermal growth factor-related receptor-like	DNER
GHT09_006451	5.65247	-1.04508	10.0506	0.00152413	0.003937	-2.5025	-2.5025	-0.231886	-0.671073	hypothetical protein	0
GHT09_006465	-5.94411	-1.10652	13.7718	0.00020668	0.000589584	-0.539088	0.00277842	-2.5025	-2.5025	G-protein coupled receptor 55	GPR55
GHT09_006469	2.53416	1.60842	46.467	9.4459e-12	4.56293e-11	-0.00687362	-0.154015	2.20555	2.24995	hypothetical protein	0
GHT09_006470	1.80207	0.934499	17.0449	3.65779e-05	0.000111806	-0.539088	0.14419	1.66265	1.24477	hypothetical protein	0
GHT09_006487	-2.33923	-0.692559	7.64759	0.00568911	0.0136798	-1.04838	0.602018	-2.5025	-1.20254	acetylcholine receptor subunit delta	CHRND
GHT09_006493	-10.0353	2.4126	279.212	1.79396e-62	3.81802e-61	3.39417	3.69722	-2.5025	-2.5025	ephexin-1	NGEF
GHT09_006494	-5.33425	0.818515	75.7703	3.3027e-18	2.14535e-17	1.98671	1.79838	-2.5025	-1.7108	phosphatidylinositol 3 4 5-trisphosphate 5-phosphatase 1	INPP5D
GHT09_006508	-1.81801	5.91155	268.605	4.43309e-60	9.0958e-59	6.39931	6.73409	4.84889	4.68857	hypothetical protein	0
GHT09_006509	-1.53259	1.38304	20.9224	4.79654e-06	1.58235e-05	1.74383	2.23771	0.93532	0.273371	hypothetical protein	0
GHT09_006510	-1.13448	2.39579	22.8781	1.73204e-06	5.91611e-06	2.79314	3.0033	2.07956	1.56091	hypothetical protein	0
GHT09_006511	-1.49664	4.33241	113.734	1.61368e-26	1.44304e-25	4.87506	4.99804	3.46907	3.44428	hypothetical protein	0
GHT09_006520	-1.70343	-0.329517	6.43013	0.0112237	0.0259501	0.134344	0.391189	-1.43697	-0.827436	ras protein family member 10A-like	RASL10A
GHT09_006530	3.03384	0.0127352	16.9514	3.84243e-05	0.000117136	-1.04838	-2.5025	0.307153	0.786352	hypothetical protein	0
GHT09_006534	2.37312	0.660083	21.2638	4.01422e-06	1.33304e-05	-1.84261	-0.154015	1.37148	1.12186	hypothetical protein	0
GHT09_006536	3.1089	4.97082	448.187	6.04878e-99	2.32009e-97	2.72778	2.62317	5.80768	5.69983	putative tumor suppressor protein MN1	0
GHT09_006541	3.649	0.842346	41.1258	1.44288e-10	6.53971e-10	-1.04838	-1.83829	1.5244	1.52901	hypothetical protein	0
GHT09_006542	-1.09212	6.91455	135.848	2.41277e-31	2.51034e-30	7.34429	7.39367	6.22531	6.32613	protein-tyrosine sulfotransferase 2	TPST2
GHT09_006543	-1.58217	4.67327	146.182	1.35065e-33	1.4913e-32	5.31785	5.27674	3.73246	3.72328	H/ACA ribonucleoprotein complex non-core subunit NAF1	0
GHT09_006552	-1.0193	5.44221	80.8669	2.51467e-19	1.71019e-18	5.90315	5.86208	4.89638	4.84247	peripheral plasma membrane protein CASK	CASK
GHT09_006556	-1.33128	6.14334	159.998	1.32558e-36	1.60972e-35	6.57685	6.77136	5.44535	5.25934	glucocorticoid-induced transcript 1 protein	GLCCI1
GHT09_006560	-1.20854	2.33041	24.8617	6.18448e-07	2.18841e-06	2.61179	3.07571	1.78881	1.62266	hypothetical protein	0
GHT09_006570	2.3416	1.15737	30.1812	3.95825e-08	1.52937e-07	-0.539088	-0.154015	1.74797	1.73875	sodium/calcium exchanger 1-like	SLC8A1
GHT09_006576	1.26779	1.07808	10.4373	0.00123591	0.00323066	0.381049	0.272969	1.70594	1.28352	MORN repeat-containing protein 2	MORN2
GHT09_006580	6.27917	-0.601403	16.8741	4.00204e-05	0.000121767	-2.5025	-2.5025	-0.231886	0.194237	myosin light chain 4	MYL4
GHT09_006582	1.44062	4.04155	84.6141	3.79173e-20	2.6651e-19	2.89591	3.30387	4.57892	4.4999	hypothetical protein	0
GHT09_006586	1.68919	5.06536	177.217	2.38073e-40	3.19905e-39	4.06667	3.8392	5.66964	5.60549	vesicle-fusing ATPase	NSF
GHT09_006587	1.57234	5.17584	161.995	4.87245e-37	5.99837e-36	4.21715	4.09578	5.68595	5.75257	ADP-ribosylation factor 2	ARF2
GHT09_006601	-1.51626	6.26143	212.502	5.15149e-48	8.31315e-47	6.76238	6.92748	5.30811	5.35795	hypothetical protein	0
GHT09_006602	-5.07099	-1.59362	6.78909	0.00917498	0.0214977	-1.39151	-0.530361	-2.5025	-2.5025	phosphatidylcholine transfer protein	PCTP
GHT09_006614	1.9373	5.94595	290.099	9.39639e-65	2.08168e-63	4.44438	4.8355	6.62124	6.54624	leucine zipper putative tumor suppressor 2	LZTS2
GHT09_006615	1.9352	3.18827	86.1047	1.78696e-20	1.27298e-19	1.78726	1.96015	3.60104	3.8832	hypothetical protein	0
GHT09_006618	1.48802	5.92006	179.566	7.34693e-41	9.96343e-40	4.9629	4.984	6.46307	6.45052	sideroflexin-3	SFXN3
GHT09_006619	1.53425	3.92004	88.3742	5.68636e-21	4.13533e-20	2.77168	3.05795	4.48264	4.39322	kazal-type serine protease inhibitor domain-containing protein 1	KAZALD1
GHT09_006625	1.32735	4.29737	83.4465	6.83607e-20	4.74166e-19	3.54094	3.36294	4.81963	4.72421	F-box/WD repeat-containing protein 4	FBXW4
GHT09_006630	1.69331	3.8077	98.2598	3.89548e-23	3.07555e-22	2.77168	2.59881	4.43197	4.28758	UPF0668 protein C10orf76-like	ARMH3
GHT09_006637	1.42402	2.50128	33.4867	7.22737e-09	2.93245e-08	1.3394	1.79838	2.83185	3.05393	phospholipase ABHD3	ABHD3
GHT09_006714	1.37025	8.29752	257.754	7.94442e-58	1.56746e-56	7.54421	7.35145	8.8198	8.82122	heterogeneous nuclear ribonucleoprotein M	HNRNPM
GHT09_006715	1.23849	7.98181	205.626	1.60161e-46	2.49261e-45	7.18902	7.26698	8.40413	8.52411	ras-related protein Rab-11B	RAB11B
GHT09_006716	12.4606	5.04053	1021.43	2.52781e-220	3.31015e-218	-2.5025	-2.5025	5.82251	6.07872	angiopoietin-related protein 4	ANGPTL4
GHT09_006722	-5.42388	-1.4125	9.02973	0.00265784	0.00667113	-0.771375	-0.530361	-2.5025	-2.5025	hypothetical protein	0
GHT09_006723	-8.58103	1.01066	105.515	1.0089e-24	8.43512e-24	2.25764	1.99791	-2.5025	-2.5025	hypothetical protein	0
GHT09_006728	-1.99521	3.71961	138.398	6.71047e-32	7.02805e-31	4.54901	4.37224	2.23541	2.67116	volume-regulated anion channel subunit LRRC8E	LRRC8E
GHT09_006729	-4.0084	0.512255	47.2495	6.58171e-12	3.1989e-11	0.859193	1.96015	-0.83081	-2.5025	hypothetical protein	0
GHT09_006741	-2.4614	4.8381	334.087	2.44044e-74	6.38335e-73	5.60855	5.68821	3.36488	3.07617	hypothetical protein	0
GHT09_006743	-1.33101	6.47314	176.934	2.74311e-40	3.67637e-39	7.02411	6.98619	5.56185	5.77313	hypothetical protein	0
GHT09_006745	-1.28155	2.37549	28.5829	9.02494e-08	3.39761e-07	2.77168	3.07571	1.74797	1.65257	peroxisomal membrane protein 11C	PEX11G
GHT09_006748	-1.10377	6.19517	113.413	1.89683e-26	1.69111e-25	6.56909	6.74106	5.66691	5.45024	insulin receptor	INSR
GHT09_006754	1.31334	4.96	108.461	2.2904e-25	1.96283e-24	4.08418	4.18032	5.44854	5.4288	peripheral myelin protein 22	PMP22
GHT09_006757	-2.70475	-1.10736	5.99853	0.014322	0.0326762	-1.04838	0.00277842	-1.87352	-2.05301	heparan sulfate glucosamine 3-O-sulfotransferase 3B1	HS3ST3B1
GHT09_006760	-11.483	3.87932	680.041	1.16934e-147	7.7053e-146	4.78152	5.16915	-2.5025	-2.5025	hypothetical protein	0
GHT09_006763	-1.00299	3.74803	39.1415	3.98059e-10	1.75465e-09	4.13549	4.26018	3.26711	3.16186	DNA-directed primase/polymerase protein	PRIMPOL
GHT09_006776	3.83414	7.75512	1413.68	3.28914e-304	7.43093e-302	4.82905	4.80387	8.61185	8.67245	hypothetical protein	0
GHT09_006777	-2.60667	-0.287458	13.5525	0.000232282	0.000658777	0.262963	0.696902	-1.43697	-1.4344	hypothetical protein	0
GHT09_006778	1.79456	1.11403	19.3793	1.0743e-05	3.44028e-05	0.134344	-0.154015	1.42428	1.73875	hypothetical protein	0
GHT09_006784	2.2939	4.90202	279.023	1.97074e-62	4.18992e-61	3.29235	3.31886	5.54705	5.60931	ephrin-B2	EFNB2
GHT09_006794	1.0446	5.14661	75.0752	5.43889e-18	3.50637e-17	4.78688	4.17209	5.66142	5.44598	axin interactor dorsalization-associated protein	AIDA
GHT09_006808	1.36285	4.47534	95.3293	1.70548e-22	1.31175e-21	3.66253	3.55248	5.03862	4.88718	mitogen-activated protein kinase-binding protein 1	MAPKBP1
GHT09_006809	-2.94857	6.4963	729.617	2.68324e-159	1.99872e-157	7.2697	7.41737	4.54356	4.2828	MAX protein	MLX
GHT09_006812	-6.69343	-0.589492	25.3121	4.89702e-07	1.74555e-06	0.262963	0.500452	-2.5025	-2.5025	hypothetical protein	0
GHT09_006816	3.29013	1.23873	49.8085	1.72187e-12	8.65098e-12	-1.04838	-0.763173	2.04626	1.82007	hypothetical protein	0
GHT09_006818	1.19958	4.9655	91.9781	9.23624e-22	6.93022e-21	4.27168	4.1638	5.27974	5.51883	protein Mis18-beta	OIP5
GHT09_006821	-1.04381	7.95527	148.577	4.06378e-34	4.56044e-33	8.37986	8.39909	7.32166	7.3697	synaptogyrin-2	SYNGR2
GHT09_006822	1.21768	6.47099	145.59	1.81805e-33	1.99986e-32	5.66202	5.78588	6.93954	6.94104	hypothetical protein	0
GHT09_006823	1.99885	5.33713	259.441	3.42491e-58	6.82955e-57	4.11859	3.8392	5.86132	6.06905	hypothetical protein	0
GHT09_006824	1.77985	7.62279	388.36	4.70659e-86	1.48182e-84	6.46764	6.46424	8.18022	8.30327	hypothetical protein	0
GHT09_006828	1.42038	7.44185	248.187	1.34796e-55	2.53687e-54	6.71958	6.3702	7.9087	8.03532	hypothetical protein	0
GHT09_006829	1.06002	4.33785	56.1555	6.82998e-14	3.6548e-13	3.70843	3.66238	4.73335	4.73823	SEC14 protein 1	SEC14L1
GHT09_006830	-6.87657	-0.451131	29.3462	6.10226e-08	2.32413e-07	-0.16343	1.02414	-2.5025	-2.5025	hypothetical protein	0
GHT09_006832	-5.42388	-1.4125	9.02973	0.00265784	0.00667113	-0.771375	-0.530361	-2.5025	-2.5025	hypothetical protein	0
GHT09_006835	-8.83807	1.25058	126.623	2.48003e-29	2.43142e-28	2.1619	2.57402	-2.5025	-2.5025	phospholipid-metabolizing enzyme A-C1	PLAAT1
GHT09_006836	-1.43323	1.31886	17.6887	2.60724e-05	8.0848e-05	1.55574	2.2058	0.93532	0.273371	protein MB21D2	MB21D2
GHT09_006839	-5.07066	-1.59365	6.78799	0.00918064	0.0214977	-0.539088	-1.38521	-2.5025	-2.5025	hypothetical protein	0
GHT09_006842	-2.96539	-0.286734	16.3143	5.37537e-05	0.000161946	0.591662	0.500452	-1.43697	-1.7108	hypothetical protein	0
GHT09_006845	6.6877	3.6242	413.492	3.33784e-91	1.14371e-89	-2.5025	-0.763173	4.60202	4.38879	hypothetical protein	0
GHT09_006846	-1.30555	6.30272	162.187	4.86672e-37	5.9949e-36	6.65951	6.98031	5.42929	5.6074	serine/threonine-protein kinase D2	PRKD2
GHT09_006847	-1.17254	7.80113	183.029	1.29792e-41	1.79208e-40	8.34396	8.20744	7.05075	7.15597	striatin-4	STRN4
GHT09_006853	-1.11874	2.01879	17.5647	2.78275e-05	8.60958e-05	2.51177	2.52314	1.42428	1.46303	hypothetical protein	0
GHT09_006864	1.75195	2.46635	46.7487	8.18216e-12	3.96551e-11	1.08479	1.51561	3.09869	2.91276	hypothetical protein	0
GHT09_006865	1.926	0.469619	13.4265	0.000248412	0.000701813	-1.04838	-0.329951	1.13857	0.839329	hypothetical protein	0
GHT09_006872	-1.72063	7.34551	355.789	5.02011e-79	1.4177e-77	7.95038	7.99747	6.20659	6.2992	EH domain-containing protein 2	EHD2
GHT09_006886	4.0839	-0.337106	16.5629	4.71496e-05	0.000142782	-1.84261	-2.5025	0.415434	0.194237	hypothetical protein	0
GHT09_006887	-3.24904	-1.32985	5.87483	0.0153631	0.0348659	-0.539088	-0.763173	-1.87352	-2.5025	hypothetical protein	0
GHT09_006888	-3.25473	-1.33052	5.89613	0.0151784	0.0345039	-0.771375	-0.530361	-2.5025	-2.05301	hypothetical protein	0
GHT09_006890	-1.38867	2.95841	46.8988	7.57978e-12	3.68051e-11	3.56609	3.52688	2.32143	2.08427	cAMP-dependent protein kinase type II-beta regulatory subunit	PRKAR2B
GHT09_006892	-1.86593	6.52383	337.032	5.64117e-75	1.50424e-73	7.20512	7.18035	5.30811	5.35112	hypothetical protein	0
GHT09_006895	-8.05782	0.535036	73.6341	9.726e-18	6.20021e-17	1.9102	1.29071	-2.5025	-2.5025	myocardial zonula adherens protein	MYZAP
GHT09_006905	1.32343	5.6724	135.859	2.95761e-31	3.06943e-30	4.58636	5.06627	6.2854	6.04247	CCR4-NOT transcription complex subunit 6	CNOT6
GHT09_006920	3.12617	6.05688	646.682	5.3192e-141	3.32393e-139	3.46274	3.99669	6.85553	6.872	A disintegrin and metalloproteinase with thrombospondin motifs 2	ADAMTS2
GHT09_006924	-1.805	0.203636	11.7367	0.000613385	0.00166345	0.77541	0.949025	-0.83081	-0.530011	zinc finger protein 2	ZNF2
GHT09_006925	-5.22947	-0.00123466	38.5456	5.39987e-10	2.36254e-09	0.591662	1.3503	-2.5025	-2.05301	homeobox protein prophet of Pit-1	PROP1
GHT09_006931	-1.10093	2.01168	16.9339	3.8779e-05	0.000118165	2.68249	2.29949	1.5244	1.39388	hypothetical protein	0
GHT09_006941	2.37103	5.10616	317.463	9.54831e-71	2.32587e-69	3.59081	3.28871	5.80271	5.80011	liprin-beta-2	PPFIBP2
GHT09_006946	-5.57215	-1.32979	10.1836	0.00141799	0.00367484	-0.00687362	-1.38521	-2.5025	-2.5025	hypothetical protein	0
GHT09_006947	2.03678	-0.379665	6.73422	0.00946139	0.0221142	-1.84261	-1.04092	-0.602418	0.419699	hypothetical protein	0
GHT09_006959	-2.07039	5.24416	285.915	6.35229e-64	1.39081e-62	5.97768	5.97051	4.04213	3.80546	caspase-13-like	0
GHT09_006960	-3.13137	3.01155	187.382	1.46997e-42	2.06147e-41	3.94731	3.96844	1.07395	0.839329	caspase-1	CASP1
GHT09_006964	5.15238	0.531526	42.9501	5.68153e-11	2.63612e-10	-1.84261	-2.5025	1.31668	1.20495	hypothetical protein	0
GHT09_006966	-7.84095	0.343605	63.2239	1.89175e-15	1.09034e-14	1.3966	1.46259	-2.5025	-2.5025	transcription factor SOX-2	SOX2
GHT09_006968	1.2169	7.77973	193.896	5.64829e-44	8.23568e-43	6.9328	7.14187	8.26226	8.25168	reticulocalbin-1	RCN1
GHT09_006983	1.86415	3.99472	128.483	1.70045e-29	1.6727e-28	2.22643	3.12773	4.7695	4.40205	hypothetical protein	0
GHT09_006985	-4.27564	-0.0682058	30.7951	2.88525e-08	1.12622e-07	1.27983	0.391189	-2.5025	-1.7108	hypothetical protein	0
GHT09_006987	9.13596	6.92343	2212.39	0	0	-0.339066	-1.38521	7.81605	7.96294	von Willebrand factor A domain-containing protein 1	VWA1
GHT09_006988	4.35188	3.7943	351.875	3.51358e-78	9.828e-77	0.262963	0.602018	4.61343	4.61831	hypothetical protein	0
GHT09_006989	1.60768	3.70087	84.4565	4.10556e-20	2.87977e-19	2.68249	2.59881	4.05892	4.34824	ankyrin repeat domain-containing protein 65	ANKRD65
GHT09_006992	2.0563	8.10817	538.323	2.52148e-118	1.22551e-116	6.75008	6.71862	8.73516	8.84003	matrix-remodeling-associated protein 8	MXRA8
GHT09_006993	-1.11409	7.77955	165.316	9.22825e-38	1.15685e-36	8.302	8.16968	7.06225	7.18056	hypothetical protein	0
GHT09_007005	-2.11245	2.82159	91.4719	1.19216e-21	8.90607e-21	3.46274	3.73125	1.20041	1.76637	hypothetical protein	0
GHT09_007006	-2.1254	1.0016	28.2877	1.05103e-07	3.93806e-07	1.82941	1.71014	-0.231886	-0.0731063	hypothetical protein	0
GHT09_007010	2.9273	3.18066	157.3	6.16431e-36	7.36814e-35	1.15278	0.949025	3.48158	4.1423	hypothetical protein	0
GHT09_007018	1.54655	3.82865	85.0272	3.07816e-20	2.17695e-19	2.89591	2.73919	4.36603	4.32521	sterile alpha motif domain-containing protein 11	SAMD11
GHT09_007022	5.17171	-1.3347	6.78713	0.00918507	0.0214977	-2.5025	-2.5025	-0.83081	-0.827436	hypothetical protein	0
GHT09_007023	1.04502	5.63419	86.2193	1.68663e-20	1.20275e-19	5.03223	4.97456	6.17228	5.91716	membrane cofactor protein	CD46
GHT09_007026	1.49899	6.52585	218.733	2.28968e-49	3.83647e-48	5.56866	5.58345	7.06433	7.0789	plexin-A2	PLXNA2
GHT09_007034	-1.54734	5.56901	184.885	5.12695e-42	7.14126e-41	6.21879	6.12139	4.63038	4.62963	digestive organ expansion factor-like	UTP25
GHT09_007042	-1.35743	6.73415	197.201	1.08149e-44	1.60653e-43	7.27065	7.27181	5.94048	5.89387	phospholipase A-2-activating protein	PLAA
GHT09_007056	-4.45183	-0.589645	19.1856	1.18999e-05	3.8007e-05	0.859193	-0.530361	-1.87352	-2.5025	hypothetical protein	0
GHT09_007070	-2.75851	8.0438	910.609	7.04894e-198	7.17422e-196	8.84556	8.86304	6.14108	6.05932	coiled-coil domain-containing protein 80	CCDC80
GHT09_007073	-5.07077	-1.59364	6.78835	0.00917875	0.0214977	-0.771375	-1.04092	-2.5025	-2.5025	OX-2 membrane glycoprotein	CD200
GHT09_007076	-3.79564	1.9379	122.299	2.35454e-28	2.23383e-27	2.63574	3.22646	-1.43697	-0.0731063	TPA-induced transmembrane protein	C3ORF52
GHT09_007078	-1.00794	4.79243	65.0247	7.59474e-16	4.45098e-15	5.33258	5.13143	4.179	4.27802	mycophenolic acid acyl-glucuronide esterase mitochondrial	ABHD10
GHT09_007085	1.71028	6.20267	251.562	1.74447e-56	3.34869e-55	5.19425	4.97929	6.90745	6.68296	SHC SH2 domain-binding protein 1	SHCBP1
GHT09_007086	7.25628	2.43806	198.373	7.40169e-45	1.10429e-43	-2.5025	-1.83829	3.60104	2.94937	CMP-N-acetylneuraminate-poly-alpha-2 8-sialyltransferase	ST8SIA4
GHT09_007088	1.17931	5.87166	114.948	8.76558e-27	7.90055e-26	5.16573	5.13143	6.33967	6.3098	phosphorylase b kinase regulatory subunit beta	PHKB
GHT09_007105	-6.51548	3.12311	389.578	2.57096e-86	8.14428e-85	4.11006	4.35051	-1.87352	-1.20254	transmembrane protein 252	TMEM252
GHT09_007106	2.00542	4.50265	189.256	5.75539e-43	8.1379e-42	3.11624	3.1614	5.1048	5.14036	BTB/POZ domain-containing protein KCTD1	KCTD1
GHT09_007108	1.15742	6.17302	120.575	5.17915e-28	4.86424e-27	5.46885	5.46712	6.68212	6.56406	protein SSXT	SS18
GHT09_007110	1.01797	5.49491	79.2363	5.73043e-19	3.83627e-18	4.84968	4.91166	5.90609	5.88445	zinc finger protein 521	ZNF521
GHT09_007111	-9.00415	1.40798	141.787	1.225e-32	1.31789e-31	2.48565	2.59881	-2.5025	-2.5025	hypothetical protein	0
GHT09_007114	3.64198	-0.649754	10.7838	0.00102477	0.00270312	-2.5025	-1.83829	-0.405289	0.110509	protein FAM212B	INKA2
GHT09_007130	-1.61259	4.94143	166.555	4.95974e-38	6.27491e-37	5.60855	5.52969	3.97293	3.96295	hypothetical protein	0
GHT09_007131	-3.83697	3.58167	335.259	1.36259e-74	3.58687e-73	4.52996	4.6404	0.698669	0.987501	hypothetical protein	0
GHT09_007132	-2.17246	7.26294	534.658	1.54447e-117	7.48884e-116	8.04342	7.92949	5.76227	5.86702	E3 ubiquitin-protein ligase DTX1	DTX1
GHT09_007133	4.62822	6.36262	1180.73	5.84671e-252	9.53989e-250	2.28819	2.98461	7.18779	7.34243	hypothetical protein	0
GHT09_007134	3.63101	4.31271	397.574	4.09181e-87	1.3083e-85	0.77541	2.07059	5.1758	5.06174	hypothetical protein	0
GHT09_007136	1.02599	5.17031	73.278	1.16453e-17	7.39854e-17	4.72123	4.35051	5.55595	5.58043	RBPJ-interacting and tubulin-associated protein 1	RITA1
GHT09_007137	4.52086	1.24706	67.476	2.19431e-16	1.31947e-15	-1.39151	-1.83829	1.94149	2.01688	hypothetical protein	0
GHT09_007141	-11.5018	3.8986	687.301	1.06109e-144	6.81715e-143	4.72123	5.24569	-2.5025	-2.5025	serine dehydratase-like	SDSL
GHT09_007144	1.00438	5.49831	77.2922	1.53038e-18	1.00714e-17	4.78152	4.99804	5.90609	5.88287	hypothetical protein	0
GHT09_007145	1.73135	3.36729	79.6332	4.68942e-19	3.14756e-18	1.98671	2.41564	3.90025	3.92056	hypothetical protein	0
GHT09_007158	-9.32071	1.71126	174.529	1.01915e-39	1.34657e-38	2.51177	3.12773	-2.5025	-2.5025	hypothetical protein	0
GHT09_007161	1.16947	6.02359	117.235	2.77556e-27	2.54177e-26	5.2917	5.32582	6.50503	6.44626	nuclear distribution protein nudE 1	NDEL1
GHT09_007164	-8.63315	1.05876	109.564	1.31512e-25	1.1389e-24	2.02349	2.32942	-2.5025	-2.5025	hypothetical protein	0
GHT09_007171	6.34521	-0.553898	17.7975	2.46227e-05	7.64911e-05	-2.5025	-2.5025	-0.0771072	0.194237	extracellular sulfatase Sulf-1	SULF1
GHT09_007173	-1.42704	2.52837	38.4535	5.66063e-10	2.47032e-09	3.1499	3.1106	1.47521	1.92183	alpha- and gamma-adaptin-binding protein p34	AAGAB
GHT09_007175	5.32859	3.56989	357.275	2.39794e-79	6.79989e-78	-0.16343	-1.04092	4.34565	4.4624	hypothetical protein	0
GHT09_007183	-4.5621	6.91354	1521.73	0	0	7.84707	7.90796	3.35132	3.32862	embigin	EMB
GHT09_007193	-8.29047	0.744012	86.5247	1.44571e-20	1.03382e-19	1.94896	1.75494	-2.5025	-2.5025	transcription factor AP-2 gamma	TFAP2C
GHT09_007197	-1.16418	5.86297	115.398	6.99144e-27	6.31256e-26	6.41324	6.28113	5.12089	5.24469	hypothetical protein	0
GHT09_007200	-6.54179	1.15025	107.671	3.40964e-25	2.8871e-24	2.22643	2.29949	-1.87352	-2.5025	phosphoenolpyruvate carboxykinase cytosolic GTP	PCK1
GHT09_007227	1.99985	0.220109	11.6341	0.000648173	0.00175247	-1.04838	-0.763173	0.781941	0.674178	protein kinase C gamma type	PRKCG
GHT09_007231	-3.77471	-1.03992	10.0137	0.00155495	0.00401308	-0.16343	-0.329951	-2.5025	-2.05301	hypothetical protein	0
GHT09_007238	-1.18077	1.95713	18.6348	1.58676e-05	5.0165e-05	2.34742	2.59881	1.57197	1.16401	transmembrane channel protein 4-like	TMC4
GHT09_007244	-4.85557	-1.69345	5.70784	0.0168938	0.0380145	-1.04838	-1.04092	-2.5025	-2.5025	hypothetical protein	0
GHT09_007246	-9.09316	1.49272	150.456	1.58361e-34	1.80874e-33	2.45904	2.7831	-2.5025	-2.5025	hypothetical protein	0
GHT09_007247	-7.27377	-0.135881	40.4039	2.08691e-10	9.3495e-10	0.77541	1.02414	-2.5025	-2.5025	hypothetical protein	0
GHT09_007252	-6.65661	5.69356	1379.72	4.50066e-297	9.44174e-295	6.72098	6.74106	-0.231886	0.552542	hypothetical protein	0
GHT09_007259	-6.8209	1.40729	131.705	1.93126e-30	1.95302e-29	2.45904	2.59881	-2.5025	-2.05301	hypothetical protein	0
GHT09_007263	7.33682	3.35668	360.91	3.93749e-80	1.13218e-78	-1.84261	-1.83829	4.23178	4.19914	hypothetical protein	0
GHT09_007266	-2.25401	0.507672	21.73	3.14824e-06	1.05552e-05	0.859193	1.61616	-0.405289	-0.827436	hypothetical protein	0
GHT09_007268	1.28832	1.03106	10.3531	0.00129359	0.00337626	-0.00687362	0.500452	1.57197	1.32125	hypothetical protein	0
GHT09_007275	1.50971	3.09936	53.6532	2.43571e-13	1.27257e-12	2.31811	1.88153	3.54255	3.62864	isochorismatase domain-containing protein 2	ISOC2
GHT09_007277	-3.28518	4.79886	509.443	4.03431e-112	1.82289e-110	5.60249	5.83365	2.32143	2.58071	N-acetyltransferase 14	NAT14
GHT09_007278	2.27677	5.25808	313.395	1.63057e-69	3.90254e-68	3.30735	3.97792	5.95625	5.92943	hypothetical protein	0
GHT09_007279	3.67572	4.06854	351.813	3.6232e-78	1.01208e-76	1.2177	1.3503	4.94236	4.79967	serine/threonine-protein kinase SBK2	SBK2
GHT09_007280	4.93618	2.28352	148.167	4.99148e-34	5.59236e-33	-1.04838	-1.38521	2.88931	3.19272	hypothetical protein	0
GHT09_007296	-2.96032	-0.591042	12.045	0.000519849	0.00142009	-0.771375	0.785929	-1.87352	-1.7108	hypothetical protein	0
GHT09_007305	-2.24905	0.796922	26.6844	2.40662e-07	8.79289e-07	1.65285	1.51561	0.190081	-1.00283	inositol polyphosphate 1-phosphatase	INPP1
GHT09_007307	-1.61308	7.1289	300.97	3.51574e-67	8.13966e-66	7.70145	7.76336	6.05581	6.17975	ras-related protein Rap-2b	RAP2B
GHT09_007319	3.04437	-1.04499	5.74869	0.0165053	0.0373222	-2.5025	-1.83829	-0.405289	-0.671073	hypothetical protein	0
GHT09_007320	5.75289	-0.980749	10.9059	0.000959422	0.00254119	-2.5025	-2.5025	-0.0771072	-0.671073	hypothetical protein	0
GHT09_007330	-1.11826	7.08569	147.962	5.53169e-34	6.19085e-33	7.55995	7.53521	6.43279	6.42908	eukaryotic translation initiation factor 2A	EIF2A
GHT09_007331	-1.0067	6.36662	100.068	1.56658e-23	1.25663e-22	6.73907	6.85089	5.72066	5.85259	hypothetical protein	0
GHT09_007339	-3.76954	0.577018	46.7327	8.2495e-12	3.99721e-11	1.3394	1.75494	-1.43697	-1.4344	hypothetical protein	0
GHT09_007352	-1.95992	-0.0373126	10.8082	0.00101135	0.00267012	0.859193	0.391189	-0.83081	-1.00283	transmembrane protein 40	TMEM40
GHT09_007353	1.0328	4.58514	59.9627	9.88794e-15	5.5121e-14	3.80667	4.08705	4.94687	5.0049	hypothetical protein	0
GHT09_007373	-1.00999	2.82346	23.4461	1.28928e-06	4.45185e-06	3.1499	3.4057	2.42868	2.19003	hypothetical protein	0
GHT09_007374	1.22872	5.51862	113.84	1.53022e-26	1.3708e-25	4.57402	4.92152	6.01766	5.94764	hypothetical protein	0
GHT09_007376	1.59974	5.00938	157.981	3.64274e-36	4.37448e-35	4.0128	3.92009	5.40323	5.68181	hypothetical protein	0
GHT09_007380	12.5375	5.10572	1054.86	6.04259e-216	7.39462e-214	-2.5025	-2.5025	6.24011	5.82495	hepatocyte growth factor	HGF
GHT09_007381	-13.6334	6.09044	1847.78	0	0	7.20111	7.06056	-2.5025	-2.5025	platelet glycoprotein 4	CD36
GHT09_007386	1.31626	6.46616	168.442	1.92768e-38	2.47386e-37	5.7192	5.57723	6.97977	6.94784	hypothetical protein	0
GHT09_007387	3.03674	7.06534	860.123	3.9088e-187	3.68628e-185	4.74895	4.94587	7.95709	7.80128	vascular endothelial growth factor receptor 2	KDR
GHT09_007391	8.25357	1.03889	75.8885	3.11113e-18	2.02346e-17	-2.5025	-2.5025	2.01218	1.65257	E3 ubiquitin-protein ligase LNX	LNX1
GHT09_007396	1.44117	2.29979	30.1234	4.07808e-08	1.5736e-07	1.27983	1.46259	2.52851	2.91276	hypothetical protein	0
GHT09_007398	1.88887	2.8361	66.1052	4.39334e-16	2.60596e-15	1.3394	1.75494	3.09869	3.59052	homeodomain-only protein	HOPX
GHT09_007404	2.66298	-0.261197	11.096	0.00086588	0.00230621	-1.04838	-2.5025	-0.0771072	0.487649	muscle-related coiled-coil protein	CAVIN4
GHT09_007405	2.39735	1.64847	44.3194	2.83901e-11	1.33716e-10	-0.339066	0.391189	2.62187	1.92183	hypothetical protein	0
GHT09_007408	1.34864	4.17161	80.6123	2.85983e-19	1.94044e-18	3.36581	3.25792	4.71757	4.5838	shugoshin 1-like	SGO1
GHT09_007409	2.96131	4.73459	380.179	2.7366e-84	8.37229e-83	2.51177	2.62317	5.51698	5.47347	hypothetical protein	0
GHT09_007410	2.81934	4.67005	345.281	9.32343e-77	2.56257e-75	2.81429	2.41564	5.54108	5.29296	hypothetical protein	0
GHT09_007418	-1.90008	8.27599	481.015	5.21943e-106	2.1989e-104	8.8707	9.00598	7.0328	7.049	G-protein coupled receptor 126	ADGRG6
GHT09_007432	1.54087	3.64439	76.0335	2.8912e-18	1.8828e-17	2.40431	2.84656	4.27554	4.0498	alpha-tubulin N-acetyltransferase 1	ATAT1
GHT09_007435	2.46655	4.64541	281.011	7.31787e-63	1.56391e-61	2.93505	2.86711	5.27256	5.40043	nurim	NRM
GHT09_007439	-1.11433	6.9961	143.97	4.09797e-33	4.46004e-32	7.32139	7.5818	6.31716	6.36955	hypothetical protein	0
GHT09_007441	-7.13975	1.71053	164.009	1.77621e-37	2.20914e-36	2.63574	3.02175	-2.5025	-2.05301	hypothetical protein	0
GHT09_007450	-7.03793	-0.324895	33.434	7.42553e-09	3.0087e-08	1.01344	0.272969	-2.5025	-2.5025	hypothetical protein	0
GHT09_007455	-3.87338	-0.366605	20.949	4.73063e-06	1.56211e-05	0.591662	0.500452	-1.87352	-2.05301	hypothetical protein	0
GHT09_007458	1.19792	3.88308	55.4161	9.94354e-14	5.28241e-13	3.06423	3.19429	4.30399	4.32056	hypothetical protein	0
GHT09_007464	1.6082	8.8531	357.803	1.84526e-79	5.23988e-78	7.73926	7.91969	9.48444	9.39422	hypothetical protein	0
GHT09_007470	1.3082	7.50015	198.069	2.14682e-34	2.44118e-33	6.38525	6.95174	8.14281	7.85251	hydroxymethylglutaryl-CoA synthase cytoplasmic	HMGCS1
GHT09_007477	-2.41536	-0.410316	10.6967	0.00107414	0.0028236	0.68646	-0.154015	-1.43697	-1.4344	hypothetical protein	0
GHT09_007478	-3.8295	2.25209	151.394	9.89425e-35	1.13704e-33	3.2772	3.2734	-0.0771072	-0.401522	RNA-binding protein Nova-1	NOVA1
GHT09_007480	-4.21858	0.959401	69.0027	1.01296e-16	6.19252e-16	1.98671	1.99791	-1.10229	-1.7108	hypothetical protein	0
GHT09_007481	-4.19476	2.21064	162.192	4.41357e-37	5.43996e-36	3.06423	3.43352	-0.405289	-0.671073	hypothetical protein	0
GHT09_007486	1.84567	2.86867	65.0973	7.32061e-16	4.29399e-15	1.27983	1.92138	3.43087	3.4184	amyloid beta A4 precursor protein-binding family B member 1	APBB1
GHT09_007488	-1.32277	0.61345	9.14682	0.00249305	0.00629045	1.2177	1.09554	0.190081	-0.174493	hypothetical protein	0
GHT09_007502	2.76647	3.05734	135.65	2.6652e-31	2.77016e-30	1.08479	1.09554	4.00795	3.51111	interferon-induced very large GTPase 1-like	GVIN1
GHT09_007506	1.28266	1.0914	10.7591	0.00103856	0.00273706	-0.00687362	0.602018	1.61802	1.39388	hypothetical protein	0
GHT09_007507	-1.07102	6.05409	102.498	4.60863e-24	3.77636e-23	6.37283	6.62972	5.52001	5.36248	F-box only protein 30	FBXO30
GHT09_007511	-1.29941	5.33428	124.994	5.62034e-29	5.44527e-28	5.79827	5.93201	4.74895	4.40645	protein yippee 5-like	YPEL5
GHT09_007512	-1.3316	1.73962	20.4027	6.29156e-06	2.05347e-05	2.28819	2.32942	1.0063	1.07845	protein LBH	LBH
GHT09_007518	-5.90182	3.33666	420.766	4.86763e-93	1.72244e-91	4.24077	4.60414	-1.10229	-0.827436	hypothetical protein	0
GHT09_007519	-6.44898	1.85564	172.958	2.00836e-39	2.64171e-38	2.72778	3.19429	-1.87352	-2.05301	hypothetical protein	0
GHT09_007520	-1.02999	6.25438	101.267	8.56517e-24	6.94092e-23	6.73353	6.65061	5.55002	5.76117	presenilin-1	PSEN1
GHT09_007523	-1.2058	5.65358	117.773	2.11756e-27	1.95358e-26	6.14976	6.15937	4.91955	4.98152	DDB1- and CUL4-associated factor 4	DCAF4
GHT09_007531	-4.52467	1.66692	121.663	2.99722e-28	2.83701e-27	2.83513	2.62317	-1.10229	-1.20254	serine palmitoyltransferase small subunit B	SPTSSB
GHT09_007545	-1.33966	5.57283	141.183	1.65859e-32	1.7797e-31	6.02833	6.19841	4.77967	4.78286	oxidative stress-induced growth inhibitor 1	OSGIN1
GHT09_007552	2.26812	5.33427	319.539	3.39776e-71	8.34583e-70	3.82762	3.69722	5.99603	6.03823	hypothetical protein	0
GHT09_007555	2.86518	7.96641	937.863	1.13213e-203	1.21226e-201	5.86313	5.95139	8.7078	8.82779	coactosin protein-like	COTL1
GHT09_007558	1.14885	0.397694	5.25332	0.02191	0.0484664	-0.339066	-0.154015	0.415434	0.939781	cysteine-rich secretory protein LCCL domain-containing 2	CRISPLD2
GHT09_007562	3.92142	4.19652	405.433	9.80767e-90	3.27863e-88	0.938376	1.40754	4.99566	5.02505	hypothetical protein	0
GHT09_007564	3.99294	4.12188	395.497	1.3605e-87	4.41872e-86	1.08479	1.02414	4.84889	5.0078	hypothetical protein	0
GHT09_007566	-5.07066	-1.59365	6.78799	0.00918064	0.0214977	-0.539088	-1.38521	-2.5025	-2.5025	hypothetical protein	0
GHT09_007569	-4.38815	-0.63942	18.0415	2.16615e-05	6.76637e-05	-0.00687362	0.500452	-2.5025	-2.05301	hypothetical protein	0
GHT09_007571	1.05103	7.56258	141.93	1.14036e-32	1.22747e-31	7.01043	6.86117	8.00446	7.97149	hypothetical protein	0
GHT09_007572	1.98353	4.68166	201.72	1.12865e-45	1.71754e-44	3.35141	3.31886	5.16809	5.40922	DNA replication complex GINS protein PSF2	GINS2
GHT09_007577	-2.70444	-1.10739	5.99706	0.0143339	0.0326926	-0.339066	-0.530361	-1.87352	-2.05301	hypothetical protein	0
GHT09_007580	3.13593	2.97357	150.481	1.56419e-34	1.78855e-33	0.490195	0.869781	3.51847	3.81871	methenyltetrahydrofolate synthase domain-containing protein	MTHFSD
GHT09_007586	-9.48517	4.91381	1141.18	8.95659e-247	1.40564e-244	5.98002	5.99405	-2.5025	-1.7108	hypothetical protein	0
GHT09_007595	2.23829	8.7182	654.539	3.05349e-143	1.93755e-141	7.13961	7.25436	9.43806	9.43216	enhancer of filamentation 1	NEDD9
GHT09_007607	-6.40711	-0.797021	20.0663	7.50049e-06	2.43183e-05	-0.16343	0.391189	-2.5025	-2.5025	olfactory receptor 5B3-like	OR5B3
GHT09_007624	3.87635	4.50932	473.92	1.75329e-104	7.16617e-103	1.65285	1.40754	5.36997	5.30007	EGF-containing fibulin extracellular matrix protein 1-like	EFEMP1
GHT09_007627	-1.26588	5.73517	131.632	2.00352e-30	2.02509e-29	6.26368	6.2443	4.97811	5.0049	bile acid receptor	NR1H4
GHT09_007643	3.90805	-0.463216	14.0067	0.000182411	0.00052333	-2.5025	-1.83829	0.0626637	0.194237	hypothetical protein	0
GHT09_007646	1.63561	7.4238	322.344	8.41298e-72	2.08388e-70	6.39931	6.35392	7.95261	8.06447	calcium-regulated heat stable protein 1	CARHSP1
GHT09_007647	2.97684	1.14447	41.2988	1.32077e-10	5.99815e-10	-0.771375	-0.763173	1.97727	1.65257	hypothetical protein	0
GHT09_007649	1.00317	7.84891	134.616	4.47928e-31	4.62994e-30	7.22598	7.28809	8.29895	8.22051	UPF0472 protein C16orf72-like	C16ORF72
GHT09_007658	-1.7026	8.33283	394.163	2.63784e-87	8.4869e-86	9.01695	8.88462	7.13235	7.35499	myc proto-oncogene protein	MYC
GHT09_007659	-1.39547	1.40587	17.8822	2.35522e-05	7.32762e-05	1.9102	2.07059	0.93532	0.487649	hypothetical protein	0
GHT09_007660	-1.18733	3.27608	42.1857	8.39498e-11	3.86026e-10	3.9183	3.66238	2.57595	2.67116	hypothetical protein	0
GHT09_007661	-2.68967	6.23143	470.457	2.49029e-41	3.40411e-40	6.66969	7.35236	4.52555	4.22923	electrogenic sodium bicarbonate cotransporter 1	SLC4A4
GHT09_007662	-6.01414	7.08436	2115.36	0	0	8.16158	8.00561	1.82852	2.30749	vitamin D-binding protein	GC
GHT09_007665	-1.04674	9.30061	159.238	1.94017e-36	2.34773e-35	9.64481	9.8163	8.6154	8.75318	sodium/potassium-transporting ATPase subunit beta-1	ATP1B1
GHT09_007667	-1.12023	5.08397	87.8398	7.79781e-21	5.63498e-20	5.77149	5.31837	4.40596	4.48336	thiamine transporter 1	SLC19A2
GHT09_007668	-1.29156	4.68779	100.446	1.2952e-23	1.04178e-22	5.19425	5.25741	4.05055	3.85131	hypothetical protein	0
GHT09_007672	-1.71062	1.18196	22.2263	2.43129e-06	8.21713e-06	1.98671	1.71014	0.307153	0.273371	histidine protein methyltransferase 1-like	METTL18
GHT09_007673	-1.49735	5.21858	158.555	2.73224e-36	3.29842e-35	5.92519	5.68821	4.28984	4.34824	uncharacterized protein	0
GHT09_007683	7.22475	2.43363	195.643	2.35807e-44	3.47773e-43	-1.84261	-2.5025	3.04912	3.39205	hypothetical protein	0
GHT09_007684	1.5263	1.26848	16.6051	4.61133e-05	0.000139788	0.490195	0.14419	1.70594	1.73875	dimethylaniline monooxygenase N-oxide-forming 2	FMO2
GHT09_007687	-1.53113	6.23736	214.387	2.0086e-48	3.27477e-47	6.74871	6.90032	5.41958	5.18454	vesicle-associated membrane protein 4	VAMP4
GHT09_007688	-1.92039	5.05753	237.142	2.32814e-53	4.18761e-52	5.81673	5.69972	3.84323	3.85775	methyltransferase protein 13	EEF1AKNMT
GHT09_007689	-4.96062	1.32927	104.562	1.63037e-24	1.35759e-23	2.02349	2.71672	-1.87352	-1.4344	hypothetical protein	0
GHT09_007697	-1.11846	7.82811	167.473	3.13215e-38	3.99218e-37	8.3353	8.23685	7.17726	7.16184	peroxiredoxin-6	PRDX6
GHT09_007702	-7.47603	0.0314391	47.4851	5.6219e-12	2.74408e-11	1.01344	1.16357	-2.5025	-2.5025	antithrombin-III	SERPINC1
GHT09_007706	-1.28203	5.88569	139.431	3.99493e-32	4.22706e-31	6.3239	6.48766	5.10884	5.14826	exostosin-1-like	EXT1
GHT09_007707	-1.3802	5.78412	156.691	6.95413e-36	8.29773e-35	6.27707	6.39341	5.00868	4.91829	exostosin-1	EXT1
GHT09_007709	-3.77461	-1.03993	10.0131	0.00155548	0.00401395	-0.00687362	-0.530361	-2.5025	-2.05301	collectin-10	COLEC10
GHT09_007710	-2.20946	5.32826	328.463	4.00568e-73	1.02557e-71	6.01012	6.15729	3.87202	3.902	hypothetical protein	0
GHT09_007715	1.92387	3.74302	117.178	2.85626e-27	2.61335e-26	2.45904	2.41564	4.17129	4.44968	scm with four MBT domains protein 2	SFMBT2
GHT09_007726	1.47253	7.92718	283.849	2.84748e-63	6.16874e-62	7.07647	6.92993	8.62318	8.31705	structural maintenance of chromosomes protein 4	SMC4
GHT09_007730	-3.8788	-0.367241	21.0155	4.56928e-06	1.51004e-05	0.262963	0.785929	-2.5025	-1.7108	hypothetical protein	0
GHT09_007732	-8.56861	3.97162	694.161	1.01696e-151	7.08734e-150	5.08972	5.05736	-2.5025	-1.7108	UDP-GlcNAc:betaGal beta-1 3-N-acetylglucosaminyltransferase 8	B3GNT8
GHT09_007733	-1.98295	6.786	404.939	1.25339e-89	4.17641e-88	7.5106	7.44412	5.43252	5.55492	2-oxoisovalerate dehydrogenase subunit alpha mitochondrial	BCKDHA
GHT09_007734	-1.86656	6.3485	320.625	1.97957e-71	4.87986e-70	7.06107	6.97795	5.04285	5.25203	exosome complex component RRP46	EXOSC5
GHT09_007747	1.07791	2.79627	24.0642	9.35333e-07	3.26754e-06	2.25764	1.99791	3.41792	2.96137	hypothetical protein	0
GHT09_007754	4.23567	2.91098	198.252	6.39503e-45	9.57577e-44	-0.539088	0.00277842	3.63504	3.74427	hypothetical protein	0
GHT09_007755	7.61044	0.483482	48.6459	3.11234e-12	1.53925e-11	-2.5025	-2.5025	0.93532	1.39388	hypothetical protein	0
GHT09_007756	2.16301	0.509863	16.4924	4.89357e-05	0.000148017	-0.339066	-1.38521	0.781941	1.20495	hypothetical protein	0
GHT09_007764	1.00216	5.3084	72.9796	1.3542e-17	8.57967e-17	4.69296	4.71598	5.7927	5.61502	cyclin-Y protein 1	CCNYL1
GHT09_007765	-2.13839	-0.798742	5.88255	0.0152959	0.0347365	-0.00687362	-0.329951	-1.43697	-1.7108	hypothetical protein	0
GHT09_007780	-1.17698	4.66052	83.5455	6.50269e-20	4.51651e-19	5.18616	5.1399	3.94611	4.03285	hypothetical protein	0
GHT09_007783	-1.908	3.88161	139.935	3.10344e-32	3.29734e-31	4.52355	4.67578	2.70956	2.72846	leucine-rich repeat-containing protein 75B	LRRC75B
GHT09_007784	-3.02678	-0.24863	17.4349	2.97933e-05	9.16672e-05	0.381049	0.785929	-1.87352	-1.4344	hypothetical protein	0
GHT09_007785	-5.60593	9.0452	2794.32	0	0	9.97624	10.0668	4.45753	4.40205	gamma-glutamyltranspeptidase 1	GGT1
GHT09_007786	-5.37465	4.5172	755.067	9.8348e-165	7.8067e-163	5.49854	5.62928	0.860668	-0.0731063	gamma-glutamyltransferase 5	GGT5
GHT09_007790	12.4278	5.00675	1005.49	4.93666e-218	6.3039e-216	-2.5025	-2.5025	5.87798	5.97453	glutathione S-transferase theta-1-like	GSTT1
GHT09_007798	1.07511	6.5745	118.323	1.60635e-27	1.48694e-26	5.83753	6.01492	7.03598	6.9688	hypothetical protein	0
GHT09_007799	3.02527	0.343145	22.7102	1.89012e-06	6.44429e-06	-1.04838	-1.83829	0.415434	1.24477	receptor-interacting serine/threonine-protein kinase 4	RIPK4
GHT09_007803	3.29519	8.34287	1231.07	9.16552e-266	1.58348e-263	5.79029	6.00568	9.1352	9.24867	serine protease HTRA1	HTRA1
GHT09_007817	1.23566	5.73326	121.546	3.17905e-28	3.00635e-27	5.05461	4.87662	6.1292	6.26209	hypothetical protein	0
GHT09_007821	9.82165	5.7441	1361.75	2.71064e-293	5.46353e-291	-1.39151	-2.5025	6.65062	6.72315	carbohydrate sulfotransferase 15	CHST15
GHT09_007824	1.84374	4.47845	162.541	3.70636e-37	4.57927e-36	3.29235	3.19429	5.10076	5.0421	tyrosine-protein kinase Tec	TEC
GHT09_007826	-4.84245	2.58882	233.001	1.84011e-52	3.26128e-51	3.84827	3.46082	-0.405289	-1.00283	magnesium transporter NIPA3	NIPAL1
GHT09_007828	6.48239	-0.461311	19.8095	8.57811e-06	2.76639e-05	-2.5025	-2.5025	0.516152	-0.0731063	hypothetical protein	0
GHT09_007829	8.42535	1.20599	86.0616	1.82627e-20	1.30053e-19	-2.5025	-2.5025	1.94149	2.01688	stromal cell-derived factor 1	SDF1
GHT09_007831	7.88567	3.0442	300.92	3.60498e-67	8.3275e-66	-1.84261	-2.5025	4.05892	3.7512	glutamyl aminopeptidase	ENPEP
GHT09_007834	1.90684	0.596331	14.5276	0.000138325	0.000401274	-0.339066	-0.763173	0.860668	1.24477	hypothetical protein	0
GHT09_007835	-1.37836	4.65872	112.436	3.10038e-26	2.74036e-25	5.04122	5.38757	3.90954	3.8121	hypothetical protein	0
GHT09_007845	-1.11953	6.08183	112.593	2.8652e-26	2.53685e-25	6.65365	6.43873	5.54407	5.32814	cTAGE family member 5	MIA2
GHT09_007853	-1.75467	8.3792	416.311	2.24544e-89	7.46989e-88	8.85993	9.14552	7.42242	7.07822	formin-binding protein 1-like	FNBP1L
GHT09_007855	-1.14132	7.47644	166.284	6.5827e-38	8.27729e-37	8.09348	7.77632	6.86511	6.74327	deoxynucleotidyltransferase terminal-interacting protein 2	DNTTIP2
GHT09_007871	1.28849	5.355	119.011	1.13649e-27	1.05629e-26	4.47126	4.62238	5.74161	5.90789	small nuclear ribonucleoprotein G	SNRPG
GHT09_007883	-3.48818	2.88847	199	6.68227e-45	9.9986e-44	3.47607	4.18851	0.860668	0.273371	prostatic acid phosphatase	PAP
GHT09_007885	1.68244	5.38828	195.187	2.96076e-44	4.34787e-43	4.1769	4.39364	5.98947	5.93856	hypothetical protein	0
GHT09_007891	-4.82768	1.20558	93.8884	3.5258e-22	2.68271e-21	2.31811	2.23771	-2.5025	-1.20254	hypothetical protein	0
GHT09_007902	-3.84266	0.641501	50.005	1.55798e-12	7.84485e-12	1.9102	1.29071	-1.10229	-1.7108	actin alpha skeletal muscle	ACTA1
GHT09_007903	-1.05689	6.40939	111.341	5.37773e-26	4.71877e-25	6.81447	6.89533	5.75456	5.84127	hypothetical protein	0
GHT09_007907	2.02359	-0.150137	8.3528	0.00385295	0.00948429	-1.39151	-1.04092	0.190081	0.419699	piggyBac transposable element-derived protein 5	PGBD5
GHT09_007909	-13.6458	6.10301	1857.17	0	0	6.96978	7.30136	-2.5025	-2.5025	angiotensinogen	AGT
GHT09_007936	-3.478	5.27759	650.611	2.11649e-142	1.33475e-140	6.17041	6.24233	2.73068	2.78356	mitogen-activated protein kinase kinase kinase MLK4	MAP3K21
GHT09_007937	-3.93047	4.27418	503.105	9.28704e-111	4.12381e-109	5.20629	5.32582	1.20041	1.56091	potassium channel subfamily K member 1	KCNK1
GHT09_007942	-1.42593	4.52332	112.827	4.58088e-26	4.03161e-25	4.73792	5.3982	3.77373	3.62109	hypothetical protein	0
GHT09_007943	9.98384	2.65814	241.388	2.79589e-54	5.10486e-53	-2.5025	-2.5025	3.63504	3.38316	hypothetical protein	0
GHT09_007944	7.81543	3.81223	486.703	3.12149e-107	1.32867e-105	-1.84261	-1.83829	4.72285	4.6594	hypothetical protein	0
GHT09_007950	1.52577	1.788	23.6061	1.18647e-06	4.10856e-06	0.68646	0.949025	2.29332	2.23025	hypothetical protein	0
GHT09_007951	2.24542	2.92068	91.9056	9.58021e-22	7.18306e-21	1.27983	1.46259	3.61246	3.48641	hypothetical protein	0
GHT09_007953	1.78702	6.78829	325.687	1.59394e-72	4.02083e-71	5.5964	5.64424	7.34067	7.46232	phosphatidylinositol 5-phosphate 4-kinase type-2 alpha	PIP4K2A
GHT09_007959	1.24103	9.65244	222.052	4.36246e-50	7.37565e-49	8.95106	8.84859	10.1189	10.1635	calmodulin	0
GHT09_007960	-8.62861	5.75755	1553.74	0	0	6.75692	6.8496	-0.83081	-1.4344	epithelial cell adhesion molecule	EPCAM
GHT09_007972	-7.13707	-0.246317	36.2051	1.79107e-09	7.56424e-09	0.77541	0.785929	-2.5025	-2.5025	hypothetical protein	0
GHT09_007973	-6.0492	-1.03915	15.0015	0.000107592	0.000315097	-0.16343	-0.154015	-2.5025	-2.5025	hypothetical protein	0
GHT09_007975	2.01659	1.70108	35.2933	2.85875e-09	1.19094e-08	0.381049	0.391189	2.29332	2.23025	hypothetical protein	0
GHT09_007976	2.79561	2.72182	110.562	7.95771e-26	6.94703e-25	0.938376	0.500452	3.36488	3.43571	hypothetical protein	0
GHT09_007981	1.67097	5.8081	215.795	9.93866e-49	1.63725e-47	4.77075	4.66994	6.33967	6.428	hypothetical protein	0
GHT09_007982	-4.75047	6.54076	1411.57	9.09768e-304	2.03304e-301	7.39429	7.63219	2.92638	2.70009	hepatocyte nuclear factor 4-alpha	HNF4A
GHT09_007988	1.67969	2.86384	55.431	9.86885e-14	5.24544e-13	1.82941	1.66392	3.08235	3.58277	junctophilin-2	JPH2
GHT09_007999	2.61901	-0.297866	10.4973	0.00119644	0.00313266	-1.84261	-1.38521	0.190081	0.273371	hypothetical protein	0
GHT09_008000	1.75409	5.6081	223.339	2.29321e-50	3.90929e-49	4.44438	4.46951	6.32586	6.0801	transcription factor 4	E2F4
GHT09_008001	-2.87208	-0.638959	10.9471	0.000938283	0.00248809	0.381049	-0.154015	-1.10229	-2.5025	coiled-coil domain-containing protein 68	CCDC68
GHT09_008002	1.03218	1.78221	11.6881	0.000629606	0.00170541	1.08479	1.22854	2.14393	2.12751	ras-related protein Rab-27B	RAB27B
GHT09_008004	-3.50312	0.367222	36.5342	1.513e-09	6.41623e-09	1.3394	1.29071	-1.10229	-1.7108	alkaline ceramidase 2	ACER2
GHT09_008005	-2.30108	10.4773	718.141	7.59939e-157	5.42486e-155	11.2235	11.2013	8.92716	8.89639	40S ribosomal protein S6	RPS6
GHT09_008006	-1.74007	6.46494	290.617	7.54087e-65	1.67603e-63	7.08628	7.1217	5.54705	5.18965	DENN domain-containing protein 4C	DENND4C
GHT09_008007	-2.36078	7.31196	599.889	1.77208e-87	5.72832e-86	8.33347	7.74543	5.66964	5.74911	perilipin-2	PLIN2
GHT09_008008	-1.20423	5.07816	100.428	1.30698e-23	1.05044e-22	5.58721	5.58035	4.52555	4.2587	hypothetical protein	0
GHT09_008009	-1.49491	6.54615	225.15	9.28424e-51	1.5893e-49	7.11852	7.12916	5.54108	5.70875	ras-related GTP-binding protein A	RALA
GHT09_008021	1.13856	4.05949	55.6836	8.68035e-14	4.62929e-13	3.55357	3.1106	4.42551	4.51626	U11/U12 small nuclear ribonucleoprotein 25 kDa protein	SNRNP25
GHT09_008035	4.04215	3.8243	335.154	1.4356e-74	3.77422e-73	0.262963	1.09554	4.75926	4.52438	hypothetical protein	0
GHT09_008037	2.57949	2.78958	103.26	3.13965e-24	2.58295e-23	1.15278	0.785929	3.58953	3.33785	hypothetical protein	0
GHT09_008039	3.04511	3.07256	154.885	1.71957e-35	2.02362e-34	1.15278	0.500452	3.75324	3.81871	hypothetical protein	0
GHT09_008041	3.03561	5.2346	479.767	9.68516e-106	4.05534e-104	3.16645	2.82572	6.08684	5.94764	aryl hydrocarbon receptor nuclear translocator protein 2-like	ARNTL2
GHT09_008042	1.4536	6.3117	193.438	7.10151e-44	1.03326e-42	5.38653	5.40173	6.86391	6.82517	mediator of RNA polymerase II transcription subunit 21	MED21
GHT09_008043	1.67722	6.23665	245.534	3.53174e-55	6.55908e-54	5.24574	5.04839	6.9293	6.7152	FGFR1 oncogene partner 2	FGFR1OP2
GHT09_008044	1.24116	6.90862	170.376	7.31742e-39	9.46156e-38	6.21283	6.08238	7.45213	7.32454	protein asunder-like	INTS13
GHT09_008049	-3.32056	5.12951	582.304	9.182e-128	4.86528e-126	5.99631	6.09768	2.68813	2.81034	tetraspanin-33	TSPAN33
GHT09_008052	5.88303	2.48722	188.854	7.03626e-43	9.94216e-42	-1.39151	-1.83829	3.48158	3.15142	lymphoid enhancer-binding factor 1	LEF1
GHT09_008054	1.08419	4.44353	61.5901	4.33123e-15	2.45103e-14	3.66253	3.88021	4.84406	4.85539	hypothetical protein	0
GHT09_008059	-5.85003	1.29067	113.045	2.28271e-26	2.0281e-25	2.43194	2.35874	-1.87352	-2.05301	GTPase IMAP family member GIMD1	GIMD1
GHT09_008061	-9.4695	1.85616	191.904	1.52991e-43	2.20107e-42	3.1828	2.7831	-2.5025	-2.5025	zinc finger protein with KRAB and SCAN domains 4-like	ZKSCAN4
GHT09_008064	-8.08351	0.557432	74.9658	4.96021e-18	3.2048e-17	1.3966	1.88153	-2.5025	-2.5025	hypothetical protein	0
GHT09_008065	-8.89553	1.3049	131.736	1.90154e-30	1.92486e-29	2.31811	2.5488	-2.5025	-2.5025	hypothetical protein	0
GHT09_008066	-6.91515	5.01091	1086.44	3.85602e-231	5.4673e-229	6.10756	6.02867	0.307153	-1.4344	piggyBac transposable element-derived protein 1	PGBD1
GHT09_008068	-3.83275	2.26026	152.019	7.23197e-35	8.32952e-34	3.24642	3.31886	0.190081	-0.671073	zinc finger protein with KRAB and SCAN domains 3	ZKSCAN3
GHT09_008069	-6.14685	-0.97479	16.2415	5.59096e-05	0.000168121	0.490195	-1.04092	-2.5025	-2.5025	hypothetical protein	0
GHT09_008071	2.53363	1.32264	37.9597	7.2889e-10	3.15346e-09	-0.339066	-0.329951	1.57197	2.14865	SCAN domain-containing protein 3	ZBED9
GHT09_008076	1.99091	7.21466	440.633	2.55915e-97	9.65387e-96	5.95644	5.8179	7.85863	7.89418	serine protease 23	PRSS23
GHT09_008082	1.44886	2.35024	31.432	2.07874e-08	8.19811e-08	1.27983	1.56676	3.04912	2.6115	hypothetical protein	0
GHT09_008084	-4.81344	3.84701	486.071	4.26766e-107	1.81279e-105	4.84455	4.95069	0.307153	0.273371	cytochrome b561	CYB561
GHT09_008085	1.22983	1.33635	11.9423	0.000549293	0.00149634	0.490195	0.696902	1.86717	1.62266	angiotensin-converting enzyme	ACE
GHT09_008091	3.74672	3.36509	235.278	7.30396e-53	1.30576e-51	0.859193	0.14419	3.85289	4.33446	hypothetical protein	0
GHT09_008092	3.53049	5.30483	599.51	4.41552e-129	2.3702e-127	2.81429	2.41564	5.87086	6.32381	glutathione-specific gamma-glutamylcyclotransferase 1	CHAC1
GHT09_008095	-2.37175	2.72525	104.412	1.79936e-24	1.49346e-23	3.24642	3.81824	1.13857	1.35802	kunitz-type protease inhibitor 1	SPINT1
GHT09_008096	-5.07099	-1.59362	6.78909	0.00917498	0.0214977	-1.39151	-0.530361	-2.5025	-2.5025	hypothetical protein	0
GHT09_008100	-3.66001	-0.102419	25.3488	4.80478e-07	1.71455e-06	0.591662	1.02414	-1.87352	-1.7108	GTP cyclohydrolase 1 feedback regulatory protein	GCHFR
GHT09_008101	1.22861	4.78591	89.9326	2.5909e-21	1.91124e-20	4.00363	4.03352	5.26534	5.21493	DNA repair protein RAD51 1	0
GHT09_008112	1.29309	4.00814	68.3541	1.40668e-16	8.54105e-16	2.99183	3.36294	4.5195	4.41955	hypothetical protein	0
GHT09_008121	-2.31335	1.56111	48.287	3.73649e-12	1.83997e-11	2.45904	2.29949	0.190081	0.273371	hypothetical protein	0
GHT09_008136	2.03453	3.94046	144.138	3.76614e-33	4.10107e-32	2.53743	2.57402	4.76439	4.35735	hypothetical protein	0
GHT09_008140	1.07668	5.54979	89.41	3.37239e-21	2.47618e-20	4.74895	5.03029	6.01981	5.92024	proline and serine-rich protein 1	PROSER1
GHT09_008143	1.48776	6.30733	201.75	1.11219e-45	1.69374e-44	5.34353	5.38401	6.79918	6.89251	hypothetical protein	0
GHT09_008144	1.37432	5.09311	123.472	1.20775e-28	1.1565e-27	4.32422	4.11309	5.59677	5.58237	hypothetical protein	0
GHT09_008146	-1.87053	0.674679	18.0637	2.14111e-05	6.69594e-05	1.3966	1.3503	-0.83081	0.0216203	mitogen-activated protein kinase kinase kinase 9-like	MAP3K9
GHT09_008147	-1.99654	4.36375	193.867	5.73146e-44	8.35104e-43	4.95816	5.22196	3.04912	3.17222	mitogen-activated protein kinase kinase kinase 9	MAP3K9
GHT09_008148	-3.22228	-0.408111	16.1423	5.88615e-05	0.000176533	0.490195	0.391189	-1.10229	-2.5025	hypothetical protein	0
GHT09_008152	-3.50893	-0.209495	21.7773	3.0716e-06	1.03083e-05	0.68646	0.696902	-1.43697	-2.05301	angiogenin	ANG
GHT09_008153	-1.63766	4.08083	118.8	1.26367e-27	1.17238e-26	4.72123	4.73846	2.99779	3.19272	ribonuclease 4	RNASE4
GHT09_008160	2.25143	-0.550974	6.60607	0.0101667	0.0236417	-1.84261	-1.38521	0.0626637	-0.174493	zinc transporter ZIP2	SLC39A2
GHT09_008161	-6.32551	-0.853894	18.7793	1.471e-05	4.66198e-05	-0.00687362	0.14419	-2.5025	-2.5025	protein NDRG2	NDRG2
GHT09_008175	-10.7444	3.12528	436.217	2.28607e-96	8.49896e-95	4.19313	4.31356	-2.5025	-2.5025	sal protein 2	SALL2
GHT09_008187	3.67535	4.88185	532.157	5.31888e-117	2.55492e-115	2.31811	1.79838	5.73379	5.67818	serine palmitoyltransferase 3	SPTLC3
GHT09_008188	-2.666	2.94512	143.105	6.32462e-33	6.84718e-32	3.77466	3.88021	1.20041	1.28352	cAMP-specific 3' 5'-cyclic phosphodiesterase 4B	PDE4B
GHT09_008194	-7.54947	0.0933409	50.5143	1.20221e-12	6.09074e-12	1.2177	1.09554	-2.5025	-2.5025	pancreatic lipase-related protein 2	PNLIPRP2
GHT09_008197	4.49339	3.42683	290.056	8.07262e-65	1.79228e-63	-0.16343	0.14419	4.27554	4.21426	heat shock 70 kDa protein 12A	HSPA12A
GHT09_008198	6.41291	-0.507231	18.7745	1.47467e-05	4.67219e-05	-2.5025	-2.5025	0.190081	0.110509	hypothetical protein	0
GHT09_008199	2.32349	-0.504976	7.25068	0.00709027	0.0168675	-1.84261	-1.38521	0.190081	-0.174493	hypothetical protein	0
GHT09_008208	-3.85045	5.42457	765.129	3.81553e-134	2.15504e-132	6.0238	6.66389	2.70956	2.45056	homeobox protein EMX2	EMX2
GHT09_008211	-1.46464	3.72279	79.1448	6.00151e-19	4.01514e-18	4.24856	4.40071	3.03221	2.75627	proline-rich nuclear receptor coactivator 1	PNRC1
GHT09_008212	-2.38363	5.2604	366.847	2.05987e-81	6.01545e-80	6.12881	5.97051	3.48158	3.82529	hypothetical protein	0
GHT09_008220	1.1953	1.42422	12.0431	0.000520387	0.00142118	0.68646	0.696902	1.31668	2.08427	adenylate kinase 4 mitochondrial	AK4
GHT09_008221	-3.54639	3.71143	328.253	5.81909e-73	1.48063e-71	4.74345	4.63442	0.610295	1.56091	putative tyrosine-protein phosphatase auxilin	DNAJC6
GHT09_008226	1.27276	3.27201	43.9151	3.47156e-11	1.62912e-10	2.45904	2.47039	3.73246	3.69482	plasminogen receptor (KT)	PLGRKT
GHT09_008228	-1.81364	2.60934	62.1027	3.33973e-15	1.90251e-14	3.42199	3.21047	1.57197	1.56091	arylamine N-acetyltransferase 2-like	NAT2
GHT09_008231	-1.75694	1.30421	25.4723	4.50702e-07	1.61307e-06	1.82941	2.13978	0.190081	0.487649	hypothetical protein	0
GHT09_008232	-1.99751	5.26581	270.905	1.12727e-60	2.3292e-59	6.00553	5.95619	3.99055	3.99832	SH2 domain-containing protein 4A	SH2D4A
GHT09_008238	-1.00921	5.12753	72.4777	1.74555e-17	1.09947e-16	5.59334	5.53932	4.74895	4.38434	rab proteins geranylgeranyltransferase component A 1	CHM
GHT09_008243	-1.15852	7.50912	172.059	3.15053e-39	4.13086e-38	7.86365	8.09107	6.85312	6.79699	hypothetical protein	0
GHT09_008252	-5.69565	5.12092	1016.98	2.28116e-216	2.8252e-214	6.20884	6.10418	1.25972	-0.0731063	voltage-dependent calcium channel gamma subunit-like	TMEM37
GHT09_008253	1.53288	2.39373	35.603	2.43891e-09	1.02142e-08	1.01344	1.71014	2.79223	2.93727	cilia- and flagella-associated protein 221	CFAP221
GHT09_008257	-2.01289	3.62518	133.628	7.35395e-31	7.51441e-30	4.19313	4.53519	2.29332	2.46749	hypothetical protein	0
GHT09_008263	5.02624	-1.41668	6.02146	0.014137	0.0322997	-2.5025	-2.5025	-0.83081	-1.00283	hypothetical protein	0
GHT09_008264	10.9441	3.5772	440.218	3.14409e-97	1.18171e-95	-2.5025	-2.5025	4.53758	4.3754	zinc finger protein GLI2	GLI2
GHT09_008265	-1.16576	7.11818	161.324	8.73899e-37	1.06943e-35	7.40392	7.76336	6.51572	6.34686	hypothetical protein	0
GHT09_008267	-1.07639	3.61599	41.8354	1.004e-10	4.59206e-10	3.96633	4.21279	3.16223	2.92507	hypothetical protein	0
GHT09_008270	-1.01108	5.07127	71.5969	2.77315e-17	1.73556e-16	5.68516	5.31464	4.60774	4.4152	hypothetical protein	0
GHT09_008276	3.16102	-0.337028	12.7719	0.00035226	0.000981051	-1.39151	-2.5025	0.307153	0.194237	hypothetical protein	0
GHT09_008277	1.81639	0.960223	17.5156	2.85547e-05	8.82259e-05	-0.539088	0.14419	1.13857	1.65257	hypothetical protein	0
GHT09_008279	-4.8783	4.20921	600.23	1.31578e-131	7.2523e-130	5.17802	5.3221	0.781941	0.348389	hypothetical protein	0
GHT09_008282	1.79902	1.586	27.283	1.76601e-07	6.51253e-07	0.591662	0.272969	2.32143	1.92183	hypothetical protein	0
GHT09_008283	1.50516	-0.114373	5.34705	0.0207622	0.046136	-0.539088	-1.38521	0.190081	0.348389	hypothetical protein	0
GHT09_008285	-1.11932	0.915909	8.24073	0.00409816	0.010041	0.938376	1.75494	0.698669	0.110509	hypothetical protein	0
GHT09_008287	5.16101	4.54686	622.27	2.48587e-136	1.4602e-134	0.134344	0.696902	5.45806	5.38715	DNA-binding protein SATB1	SATB1
GHT09_008294	2.6416	2.80645	107.791	3.20847e-25	2.72012e-24	0.859193	1.02414	3.50627	3.45281	nuclear factor of activated T-cells cytoplasmic 1	NFATC1
GHT09_008313	-1.87201	4.21167	160.454	1.05456e-36	1.28669e-35	4.81338	5.01195	3.26711	2.88783	FAS-associated death domain protein	FADD
GHT09_008316	1.3127	5.50363	128.396	1.01755e-29	1.00818e-28	4.74345	4.61633	5.92224	6.0467	platelet receptor Gi24	VSIR
GHT09_008317	4.48137	4.08275	430.253	4.40084e-95	1.6042e-93	0.381049	0.785929	4.90569	4.93055	cadherin-23	CDH23
GHT09_008318	1.31798	10.4067	250.934	2.38694e-56	4.57344e-55	9.55128	9.64932	10.8784	10.9581	hypothetical protein	0
GHT09_008319	2.9842	3.18765	162.116	4.88952e-37	6.01578e-36	0.591662	1.3503	3.67915	4.05541	carbohydrate sulfotransferase 3	CHST3
GHT09_008321	4.81303	1.87196	109.397	1.46883e-25	1.26721e-24	-0.771375	-2.5025	2.66638	2.62665	hypothetical protein	0
GHT09_008326	1.41067	6.8609	214.393	2.00221e-48	3.26953e-47	5.86819	6.08238	7.47889	7.29403	heterogeneous nuclear ribonucleoprotein H3	HNRNPH3
GHT09_008330	-6.94417	1.52747	143.66	4.78621e-33	5.19808e-32	2.61179	2.6939	-1.87352	-2.5025	dnaJ subfamily C member 12	0
GHT09_008339	-1.06001	5.27278	83.4509	6.82074e-20	4.73262e-19	5.6966	5.76139	4.65268	4.69217	hypothetical protein	0
GHT09_008340	-8.56354	0.994336	104.174	1.98187e-24	1.64163e-23	2.12852	2.1056	-2.5025	-2.5025	hypothetical protein	0
GHT09_008352	1.97863	3.87729	132.872	1.07487e-30	1.09451e-29	2.43194	2.62317	4.40596	4.53646	transmembrane protein 143	TMEM143
GHT09_008353	4.54328	0.771777	47.4431	5.74375e-12	2.80023e-11	-1.84261	-1.83829	1.61802	1.39388	synaptogyrin-4	SYNGR4
GHT09_008355	5.2536	0.616564	46.489	9.34039e-12	4.51302e-11	-2.5025	-1.83829	1.47521	1.24477	hypothetical protein	0
GHT09_008361	2.26674	0.0161781	11.5852	0.000665418	0.00179579	-1.04838	-1.38521	0.610295	0.487649	hypothetical protein	0
GHT09_008363	6.02419	-0.802613	13.5782	0.00022924	0.000650779	-2.5025	-2.5025	0.415434	-0.827436	hypothetical protein	0
GHT09_008365	2.76854	5.11938	403.684	2.33641e-89	7.75998e-88	3.21496	3.02175	5.83475	5.89544	D site-binding protein	DBP
GHT09_008366	3.32973	7.21298	1028.47	6.5832e-223	8.90421e-221	4.75989	4.7103	8.04347	8.07002	carbonic anhydrase-related protein 11	CAR11
GHT09_008369	-4.85568	-1.69344	5.70815	0.0168908	0.0380145	-1.39151	-0.763173	-2.5025	-2.5025	hypothetical protein	0
GHT09_008370	-1.78504	1.92615	39.3013	3.66805e-10	1.61862e-09	2.65931	2.59881	0.860668	0.987501	ras-interacting protein 1	RASIP1
GHT09_008371	-2.30434	1.06731	33.8721	5.92923e-09	2.42055e-08	1.78726	1.96015	0.0626637	-0.401522	retinitis pigmentosa 1 1 protein-like	RP1L1
GHT09_008377	-6.14724	-0.974748	16.246	5.57262e-05	0.000167619	-0.00687362	-0.154015	-2.5025	-2.5025	hypothetical protein	0
GHT09_008382	10.7484	3.39742	392.32	6.58689e-87	2.09628e-85	-2.5025	-2.5025	4.16355	4.33446	hypothetical protein	0
GHT09_008387	-3.12422	3.88786	306.7	2.02733e-68	4.7634e-67	4.81862	4.81449	1.66265	1.82007	trans-1 2-dihydrobenzene-1 2-diol dehydrogenase	DHDH
GHT09_008388	-1.21471	5.78345	122.992	1.53726e-28	1.46997e-27	6.21681	6.35209	5.04285	5.10294	apoptosis regulator BAX	BAX
GHT09_008389	-1.65838	11.4693	387.48	7.28785e-86	2.28401e-84	12.0166	12.1271	10.3902	10.4386	ferritin light chain	FTL
GHT09_008394	-4.6179	1.02537	78.9077	6.76531e-19	4.50999e-18	1.78726	2.32942	-1.43697	-1.7108	neurotrophin-4	NTF4
GHT09_008397	-1.11948	2.25584	20.5027	5.97147e-06	1.95334e-05	2.53743	2.9465	1.74797	1.62266	protein lin-7 B	0
GHT09_008400	-1.93603	-0.69203	5.57607	0.0182122	0.0407781	-0.00687362	-0.154015	-1.43697	-1.4344	hypothetical protein	0
GHT09_008407	-1.91011	0.458541	15.9086	6.65919e-05	0.000198992	1.15278	1.16357	-0.83081	-0.283546	hypothetical protein	0
GHT09_008408	-6.60805	1.20777	112.974	2.36499e-26	2.09939e-25	2.09436	2.52314	-2.5025	-2.05301	leukocyte antigen CD37	CD37
GHT09_008414	1.65061	-0.0162019	6.83628	0.00893571	0.0210049	-1.04838	-0.763173	0.190081	0.552542	hypothetical protein	0
GHT09_008418	-1.59276	5.94273	212.572	4.97364e-48	8.03245e-47	6.52808	6.57612	4.93782	4.9874	aldehyde dehydrogenase family 16 member A1	ALDH16A1
GHT09_008420	-1.21667	10.6331	215.348	1.24273e-48	2.04068e-47	11.171	11.0625	9.80808	9.98797	60S ribosomal protein L13a	RPL13A
GHT09_008421	-1.124	9.21303	182.712	1.52101e-41	2.09588e-40	9.66605	9.67504	8.45299	8.63315	40S ribosomal protein S11	RPS11
GHT09_008422	-1.09823	5.63547	98.0068	4.42517e-23	3.48438e-22	6.07726	6.12566	4.95587	5.05055	IgG receptor FcRn large subunit p51	FCGRT
GHT09_008423	-2.44145	3.91798	215.916	9.35521e-49	1.54237e-47	4.59861	4.88167	2.29332	2.3808	hypothetical protein	0
GHT09_008425	-3.11198	1.98006	98.143	4.13167e-23	3.25702e-22	2.79314	3.05795	0.190081	-0.0731063	transmembrane gamma-carboxyglutamic acid protein 2	PRRG2
GHT09_008427	-1.49445	6.93091	248.716	7.21789e-56	1.36767e-54	7.3978	7.60492	5.98947	6.03397	ras-related protein R-Ras	RRAS
GHT09_008439	-1.11716	6.08858	110.41	1.95773e-24	1.62295e-23	6.82623	6.22652	5.26895	5.58237	hypothetical protein	0
GHT09_008443	-11.1417	6.61273	2269.68	0	0	7.53946	7.74057	-1.43697	-2.5025	myosin-14	MYH14
GHT09_008451	-1.14301	3.80018	51.8132	6.20829e-13	3.18692e-12	4.33157	4.26792	3.30983	3.05393	receptor-interacting serine/threonine-protein kinase 2	RIPK2
GHT09_008455	-3.00994	4.69577	432.132	1.73278e-95	6.35011e-94	5.43511	5.73088	2.59909	2.62665	hypothetical protein	0
GHT09_008457	3.8731	2.86702	176.865	2.83955e-40	3.80067e-39	-0.16343	0.14419	3.45645	3.75809	hypothetical protein	0
GHT09_008460	5.17171	-1.3347	6.78713	0.00918507	0.0214977	-2.5025	-2.5025	-0.83081	-0.827436	ephrin type-A receptor 6-like	EPHA6
GHT09_008463	-1.00271	3.25946	30.1608	4.00015e-08	1.54498e-07	3.82762	3.59005	2.73068	2.72846	hypothetical protein	0
GHT09_008473	-1.00728	6.40829	101.319	8.34517e-24	6.76531e-23	6.82232	6.85218	5.82742	5.8364	ankyrin repeat domain-containing protein 10	ANKRD10
GHT09_008487	5.73084	2.71475	215.782	1.30363e-48	2.13727e-47	-0.771375	-2.5025	3.74289	3.35615	nexilin	NEXN
GHT09_008488	-1.05307	5.8389	94.4299	2.6836e-22	2.05177e-21	6.30348	6.27153	5.26895	5.20991	hypothetical protein	0
GHT09_008489	-1.22067	5.49913	115.958	5.2744e-27	4.78537e-26	6.01012	6.00104	4.89638	4.69217	hypothetical protein	0
GHT09_008491	4.46066	2.46042	155.096	1.54643e-35	1.82404e-34	-1.04838	-0.530361	3.25259	3.23287	hypothetical protein	0
GHT09_008492	1.39059	4.15667	84.5156	3.98502e-20	2.79713e-19	3.38006	3.14466	4.73335	4.56032	carbohydrate sulfotransferase 11	CHST11
GHT09_008498	1.35505	4.44119	92.937	5.69558e-22	4.31132e-21	3.65082	3.50082	4.85852	4.97266	hypothetical protein	0
GHT09_008499	1.66973	1.60454	24.3987	7.86288e-07	2.76425e-06	0.262963	0.785929	2.17507	2.03969	hypothetical protein	0
GHT09_008500	1.0813	10.2839	170.804	5.90685e-39	7.6666e-38	9.65693	9.62954	10.7585	10.6897	endoplasmin	HSP90B1
GHT09_008502	1.0731	5.90599	96.8427	7.95509e-23	6.21858e-22	5.28793	5.22594	6.3431	6.31214	G/T mismatch-specific thymine DNA glycosylase	TDG
GHT09_008506	-1.37074	6.92408	210.699	1.26877e-47	2.02521e-46	7.44263	7.48458	6.1011	6.0897	thioredoxin reductase 1 cytoplasmic	TXNRD1
GHT09_008512	-2.18233	1.25885	35.4847	2.61577e-09	1.0926e-08	1.87037	2.2058	0.781941	-0.827436	40S ribosomal protein S12	RPS12
GHT09_008518	-5.70726	-1.25148	11.3615	0.000750499	0.0020115	-0.539088	-0.329951	-2.5025	-2.5025	hypothetical protein	0
GHT09_008521	1.10962	1.8306	13.7699	0.000206888	0.000589726	0.938376	1.3503	2.4026	2.03969	phospholipid-transporting ATPase IA	ATP8A1
GHT09_008525	1.1108	6.2581	114.443	1.21298e-26	1.08993e-25	5.75245	5.3982	6.80292	6.58457	translation factor GUF1 mitochondrial	GUF1
GHT09_008529	1.6056	2.61072	44.0552	3.23203e-11	1.5181e-10	1.55574	1.56676	3.03221	3.17222	hypothetical protein	0
GHT09_008540	1.01882	6.87892	115.807	5.69203e-27	5.15517e-26	6.33675	6.2065	7.30768	7.27372	phosphoglucomutase-2	PGM2
GHT09_008543	-4.22545	0.341994	43.8915	3.51368e-11	1.64776e-10	1.60511	1.02414	-1.87352	-1.7108	uncharacterized protein	0
GHT09_008544	-1.1249	4.0957	58.9899	1.61985e-14	8.93545e-14	4.38908	4.76059	3.58953	3.37421	tyrosine-protein kinase FRK	FRK
GHT09_008549	1.10494	4.27954	58.9495	1.65343e-14	9.1158e-14	3.47607	3.70866	4.77967	4.61071	putative E3 ubiquitin-protein ligase HERC6	0
GHT09_008551	-1.73921	0.056529	9.58593	0.00196205	0.00501465	0.68646	0.696902	-1.10229	-0.530011	E3 ISG15--protein ligase HERC5	HERC5
GHT09_008552	2.08767	7.82423	533.451	2.80459e-117	1.35351e-115	6.45254	6.39518	8.56816	8.4502	sodium-coupled neutral amino acid transporter 1	SLC38A1
GHT09_008553	1.12198	9.9622	183.2	1.1917e-41	1.64651e-40	9.35759	9.22652	10.4371	10.3934	sodium-coupled neutral amino acid transporter 2	SLC38A2
GHT09_008566	-1.00045	3.31107	30.9501	2.66395e-08	1.0438e-07	3.50237	3.98734	2.68813	2.84961	hypothetical protein	0
GHT09_008570	-4.33727	0.780967	62.533	2.6852e-15	1.53432e-14	1.45162	2.1056	-1.43697	-1.7108	rho guanine nucleotide exchange factor 4	ARHGEF4
GHT09_008572	-1.48998	7.89021	292.797	2.06028e-65	4.61408e-64	8.41359	8.49999	6.99512	6.94331	pleckstrin domain-containing family B member 2	0
GHT09_008575	-1.60917	4.92027	165.186	9.8497e-38	1.2325e-36	5.63554	5.45699	3.78387	4.07211	glutaredoxin 2	GLRX2
GHT09_008578	-6.93246	-0.40782	30.7042	3.02349e-08	1.17772e-07	0.262963	0.869781	-2.5025	-2.5025	F-box/LRR-repeat protein 21	FBXL21
GHT09_008582	2.54879	4.77181	311.485	1.87203e-69	4.47005e-68	2.87593	3.03996	5.45172	5.51069	C-X-C motif chemokine 14	CXCL14
GHT09_008585	-1.02038	4.0051	46.7771	8.06454e-12	3.90943e-11	4.28689	4.61633	3.33762	3.5354	pituitary homeobox 1	PITX1
GHT09_008597	-1.07104	5.84206	97.4876	8.11085e-23	6.33793e-22	5.99399	6.54776	5.22871	5.22988	protein FAM193B	FAM193B
GHT09_008599	3.96423	3.37825	251.567	1.74e-56	3.34324e-55	0.77541	-0.154015	4.15577	4.17873	docking protein 3	DOK3
GHT09_008605	-4.94462	7.10908	1756.58	0	0	8.03106	8.13409	3.53056	2.81034	hypothetical protein	0
GHT09_008606	-3.93615	4.41645	539.222	1.61635e-118	7.87455e-117	5.39005	5.41923	1.57197	1.52901	regulator of G-protein signaling 14	RGS14
GHT09_008608	1.57181	3.16398	59.8602	1.04156e-14	5.79522e-14	2.09436	2.17317	3.60104	3.72328	max dimerization protein 3	MXD3
[truncated: 2,842 more rows]
